# Supplementary material
Source: publisher figshare collection journal article supplement (https://acs.figshare.com/ndownloader/files/9561727)
Supplement: Supplementary file 1 [file 9561727]

data_exp_1410
_audit_creation_date              2016-03-23
_audit_creation_method
;
Olex2 1.2
(compiled 2016.02.19 svn.r3266 for OlexSys, GUI svn.r5155)
;
_shelxl_version_number            2014-1
_publ_contact_author_address      ?
_publ_contact_author_email        ?
_publ_contact_author_name         ''
_publ_contact_author_phone        ?
_publ_section_references
;
Dolomanov, O.V., Bourhis, L.J., Gildea, R.J, Howard, J.A.K. & Puschmann, H.
 (2009), J. Appl. Cryst. 42, 339-341.

Sheldrick, G.M. (2015). Acta Cryst. A71, 3-8.

Sheldrick, G.M. (2015). Acta Cryst. C71, 3-8.
;
_chemical_name_common             ?
_chemical_name_systematic
;
 ?
;
_chemical_formula_moiety          '0.67(C14 H16 Br N O2)'
_chemical_formula_sum             'C9.33 H9.33 Br0.67 N0.67 O1.33'
_chemical_formula_weight          205.45
_chemical_melting_point           ?
loop_
  _atom_type_symbol
  _atom_type_description
  _atom_type_scat_dispersion_real
  _atom_type_scat_dispersion_imag
  _atom_type_scat_source
 'C' 'C' 0.0033 0.0016 'International Tables Vol C Tables 4.2.6.8 and 6.1.1.4'
 'H' 'H' 0.0000 0.0000 'International Tables Vol C Tables 4.2.6.8 and 6.1.1.4'
 'Br' 'Br' -0.2901 2.4595
 'International Tables Vol C Tables 4.2.6.8 and 6.1.1.4'
 'N' 'N' 0.0061 0.0033 'International Tables Vol C Tables 4.2.6.8 and 6.1.1.4'
 'O' 'O' 0.0106 0.0060 'International Tables Vol C Tables 4.2.6.8 and 6.1.1.4'

_shelx_space_group_comment
;
The symmetry employed for this shelxl refinement is uniquely defined
by the following loop, which should always be used as a source of
symmetry information in preference to the above space-group names.
They are only intended as comments.
;
_space_group_crystal_system       'monoclinic'
_space_group_IT_number            14
_space_group_name_H-M_alt         'P 1 21/c 1'
_space_group_name_Hall            '-P 2ybc'
loop_
  _space_group_symop_operation_xyz
 'x, y, z'
 '-x, y+1/2, -z+1/2'
 '-x, -y, -z'
 'x, -y-1/2, z-1/2'

_cell_length_a                    9.2162(18)
_cell_length_b                    11.9031(18)
_cell_length_c                    12.665(2)
_cell_angle_alpha                 90
_cell_angle_beta                  95.002(15)
_cell_angle_gamma                 90
_cell_volume                      1384.1(4)
_cell_formula_units_Z             6
_cell_measurement_reflns_used     1272
_cell_measurement_temperature     293
_cell_measurement_theta_max       26.1930
_cell_measurement_theta_min       3.6390
_shelx_estimated_absorpt_T_max    ?
_shelx_estimated_absorpt_T_min    ?
_exptl_absorpt_coefficient_mu     2.963
_exptl_absorpt_correction_T_max   1.00000
_exptl_absorpt_correction_T_min   0.26228
_exptl_absorpt_correction_type    multi-scan
_exptl_absorpt_process_details    ?
_exptl_crystal_colour             clear
_exptl_crystal_colour_lustre      clear
_exptl_crystal_density_diffrn     1.479
_exptl_crystal_density_meas       ?
_exptl_crystal_density_method     ?
_exptl_crystal_description        block
_exptl_crystal_F_000              624
_exptl_crystal_recrystallization_method ?
_exptl_crystal_size_max           ?
_exptl_crystal_size_mid           ?
_exptl_crystal_size_min           ?
_exptl_special_details
;
 ?
;
_exptl_transmission_factor_max    ?
_exptl_transmission_factor_min    ?
_diffrn_reflns_av_R_equivalents   0.0452
_diffrn_reflns_av_unetI/netI      0.0924
_diffrn_reflns_Laue_measured_fraction_full 0.999
_diffrn_reflns_Laue_measured_fraction_max 0.840
_diffrn_reflns_limit_h_max        6
_diffrn_reflns_limit_h_min        -11
_diffrn_reflns_limit_k_max        15
_diffrn_reflns_limit_k_min        -14
_diffrn_reflns_limit_l_max        17
_diffrn_reflns_limit_l_min        -16
_diffrn_reflns_number             6157
_diffrn_reflns_point_group_measured_fraction_full 0.999
_diffrn_reflns_point_group_measured_fraction_max 0.840
_diffrn_reflns_theta_full         26.000
_diffrn_reflns_theta_max          29.172
_diffrn_reflns_theta_min          2.802
_diffrn_ambient_temperature       293(2)
_diffrn_detector                  'CCD plate'
_diffrn_detector_area_resol_mean  ?
_diffrn_detector_type             Eos
_diffrn_measured_fraction_theta_full 0.999
_diffrn_measured_fraction_theta_max 0.840
_diffrn_measurement_details
;
List of Runs (angles in degrees, time in seconds):

  # Type    Start    End  Width  t~exp~   \w     \q     \k     \f   Frames
--------------------------------------------------------------------------
  1  \w     -2.00  85.00   1.00    7.30    --   16.81  57.00 -60.00   87
  2  \w     33.00  60.00   1.00    7.30    --   16.81  19.00 -90.00   27
  3  \w    -25.00  56.00   1.00    7.30    --   16.81 -99.00-180.00   81
  4  \w     -6.00  19.00   1.00    7.30    --  -17.43 -99.00-120.00   25
;
_diffrn_measurement_device        'four-circle diffractometer'
_diffrn_measurement_device_type   ?
_diffrn_measurement_method        ?
_diffrn_orient_matrix_type
'CrysAlisPro convention (1999,Acta A55,543-557)'
_diffrn_orient_matrix_UB_11       0.0319507000
_diffrn_orient_matrix_UB_12       0.0536926000
_diffrn_orient_matrix_UB_13       -0.0053350000
_diffrn_orient_matrix_UB_21       -0.0637645000
_diffrn_orient_matrix_UB_22       0.0258982000
_diffrn_orient_matrix_UB_23       0.0162206000
_diffrn_orient_matrix_UB_31       0.0293167000
_diffrn_orient_matrix_UB_32       -0.0024848000
_diffrn_orient_matrix_UB_33       0.0535835000
_diffrn_radiation_monochromator   graphite
_diffrn_radiation_probe           x-ray
_diffrn_radiation_type            MoK\a
_diffrn_radiation_wavelength      0.71073
_diffrn_source                    ?
_diffrn_source_type               'Enhance (Mo) X-ray Source'
_reflns_Friedel_coverage          0.000
_reflns_Friedel_fraction_full     .
_reflns_Friedel_fraction_max      .
_reflns_number_gt                 1519
_reflns_number_total              3147
_reflns_odcompleteness_completeness 99.66
_reflns_odcompleteness_iscentric  1
_reflns_odcompleteness_theta      26.32
_reflns_special_details
;
 Reflections were merged by SHELXL according to the crystal
 class for the calculation of statistics and refinement.
 
 _reflns_Friedel_fraction is defined as the number of unique
 Friedel pairs measured divided by the number that would be
 possible theoretically, ignoring centric projections and
 systematic absences.
;
_reflns_threshold_expression      'I > 2\s(I)'
_computing_cell_refinement        ?
_computing_data_collection        ?
_computing_data_reduction         ?
_computing_molecular_graphics     'Olex2 (Dolomanov et al., 2009)'
_computing_publication_material   'Olex2 (Dolomanov et al., 2009)'
_computing_structure_refinement   'ShelXL (Sheldrick, 2015)'
_computing_structure_solution     'ShelXT (Sheldrick, 2015)'
_refine_diff_density_max          1.739
_refine_diff_density_min          -1.082
_refine_diff_density_rms          0.137
_refine_ls_extinction_coef        .
_refine_ls_extinction_method      none
_refine_ls_goodness_of_fit_ref    1.034
_refine_ls_hydrogen_treatment     constr
_refine_ls_matrix_type            full
_refine_ls_number_parameters      166
_refine_ls_number_reflns          3147
_refine_ls_number_restraints      8
_refine_ls_R_factor_all           0.1689
_refine_ls_R_factor_gt            0.0914
_refine_ls_restrained_S_all       1.039
_refine_ls_shift/su_max           0.000
_refine_ls_shift/su_mean          0.000
_refine_ls_structure_factor_coef  Fsqd
_refine_ls_weighting_details
'w=1/[\s^2^(Fo^2^)+(0.1315P)^2^+0.2349P] where P=(Fo^2^+2Fc^2^)/3'
_refine_ls_weighting_scheme       calc
_refine_ls_wR_factor_gt           0.2174
_refine_ls_wR_factor_ref          0.2791
_refine_special_details
;
 ?
;
_olex2_refinement_description
;
1. Fixed Uiso
 At 1.2 times of:
  All C(H) groups, All C(H,H) groups
 At 1.5 times of:
  All C(H,H,H) groups
2. Rigid bond restraints
 C00I
 with sigma for 1-2 distances of 0.01 and sigma for 1-3 distances of 0.005
 C00I, C00E
 with sigma for 1-2 distances of 0.01 and sigma for 1-3 distances of 0.005
 C00D, C00I
 with sigma for 1-2 distances of 0.005 and sigma for 1-3 distances of 0.00025
 C00E, C00I
 with sigma for 1-2 distances of 0.005 and sigma for 1-3 distances of 0.0025
3. Uiso/Uaniso restraints and constraints
C00I: within 3.8A with sigma of 0.01 and sigma for terminal atoms of 0.02
C00I: within 3.8A with sigma of 0.001 and sigma for terminal atoms of 0.002
Uanis(C00I) \\sim Ueq: with sigma of 0.05 and sigma for terminal atoms of 0.1
Uanis(C00I) \\sim Ueq: with sigma of 0.05 and sigma for terminal atoms of 0.1
Uanis(C00I) \\sim Ueq: with sigma of 0.01 and sigma for terminal atoms of 0.02
Uanis(C00I) \\sim Ueq: with sigma of 0.01 and sigma for terminal atoms of 0.02
Uanis(C00I) \\sim Ueq: with sigma of 0.005 and sigma for terminal atoms of 0.01
Uanis(C00I) \\sim Ueq: with sigma of 0.0005 and sigma for terminal atoms of
0.001
4.a Secondary CH2 refined with riding coordinates:
 C00D(H00b,H00d), C00I(H00n,H00o)
4.b Aromatic/amide H refined with riding coordinates:
 C007(H007), C00A(H00A), C00C(H00C)
4.c Idealised Me refined as rotating group:
 C00F(H00e,H00f,H00g), C00G(H00h,H00i,H00j), C00H(H00k,H00l,H00m)
;
_atom_sites_solution_hydrogens    geom
_atom_sites_solution_primary      direct
_atom_sites_solution_secondary    ?
loop_
  _atom_site_label
  _atom_site_type_symbol
  _atom_site_fract_x
  _atom_site_fract_y
  _atom_site_fract_z
  _atom_site_U_iso_or_equiv
  _atom_site_adp_type
  _atom_site_occupancy
  _atom_site_site_symmetry_order
  _atom_site_calc_flag
  _atom_site_refinement_flags_posn
  _atom_site_refinement_flags_adp
  _atom_site_refinement_flags_occupancy
  _atom_site_disorder_assembly
  _atom_site_disorder_group
 Br Br 0.65086(10) 0.74574(6) 0.38933(6) 0.0782(4) Uani 1 1 d . . . . .
 O O 0.2403(4) 0.8105(3) 0.7089(3) 0.0448(10) Uani 1 1 d . . . . .
 O003 O 0.1973(6) 0.6197(4) 0.8542(3) 0.0700(14) Uani 1 1 d . . . . .
 N004 N 0.3861(6) 0.5501(4) 0.7665(4) 0.0524(14) Uani 1 1 d . . . . .
 C005 C 0.3862(6) 0.6703(4) 0.6264(4) 0.0392(13) Uani 1 1 d . . . . .
 C006 C 0.4595(7) 0.5822(4) 0.6784(4) 0.0424(14) Uani 1 1 d . . . . .
 C007 C 0.4394(7) 0.7198(5) 0.5387(5) 0.0456(14) Uani 1 1 d . . . . .
 H007 H 0.3902 0.7784 0.5026 0.055 Uiso 1 1 calc R . . . .
 C008 C 0.5690(7) 0.6782(5) 0.5072(4) 0.0518(15) Uani 1 1 d . . . . .
 C009 C 0.2507(7) 0.6967(5) 0.6796(4) 0.0394(13) Uani 1 1 d . . . . .
 C00A C 0.6409(7) 0.5891(5) 0.5579(5) 0.0509(15) Uani 1 1 d . . . . .
 H00A H 0.7265 0.5622 0.5334 0.061 Uiso 1 1 calc R . . . .
 C00B C 0.2710(8) 0.6196(5) 0.7790(4) 0.0517(16) Uani 1 1 d . . . . .
 C00C C 0.5856(8) 0.5389(5) 0.6459(5) 0.0550(17) Uani 1 1 d . . . . .
 H00C H 0.6328 0.4787 0.6809 0.066 Uiso 1 1 calc R . . . .
 C00D C 0.1057(8) 0.6710(6) 0.6142(6) 0.0681(19) Uani 1 1 d . U . . .
 H00B H 0.1235 0.6288 0.5511 0.082 Uiso 1 1 calc R . . . .
 H00D H 0.0432 0.6266 0.6558 0.082 Uiso 1 1 calc R . . . .
 C00E C 0.0942(7) 0.8563(6) 0.6825(6) 0.0626(17) Uani 1 1 d . U . . .
 C00F C 0.4375(10) 0.4658(6) 0.8444(6) 0.073(2) Uani 1 1 d . . . . .
 H00E H 0.4361 0.3932 0.8113 0.110 Uiso 1 1 calc GR . . . .
 H00F H 0.3750 0.4651 0.9012 0.110 Uiso 1 1 calc GR . . . .
 H00G H 0.5351 0.4836 0.8720 0.110 Uiso 1 1 calc GR . . . .
 C00G C 0.1105(11) 0.9666(8) 0.6291(6) 0.107(4) Uani 1 1 d . . . . .
 H00H H 0.1641 1.0173 0.6769 0.160 Uiso 1 1 calc GR . . . .
 H00I H 0.0159 0.9975 0.6090 0.160 Uiso 1 1 calc GR . . . .
 H00J H 0.1618 0.9562 0.5671 0.160 Uiso 1 1 calc GR . . . .
 C00H C 0.0224(11) 0.8743(7) 0.7833(7) 0.112(4) Uani 1 1 d . . . . .
 H00K H 0.0346 0.8084 0.8268 0.168 Uiso 1 1 calc GR . . . .
 H00L H -0.0795 0.8886 0.7667 0.168 Uiso 1 1 calc GR . . . .
 H00M H 0.0664 0.9375 0.8208 0.168 Uiso 1 1 calc GR . . . .
 C00I C 0.0377(13) 0.7754(8) 0.5855(8) 0.104(3) Uani 1 1 d . U . . .
 H00N H -0.0676 0.7686 0.5798 0.124 Uiso 1 1 calc R . . . .
 H00O H 0.0683 0.8029 0.5189 0.124 Uiso 1 1 calc R . . . .

loop_
  _atom_site_aniso_label
  _atom_site_aniso_U_11
  _atom_site_aniso_U_22
  _atom_site_aniso_U_33
  _atom_site_aniso_U_23
  _atom_site_aniso_U_13
  _atom_site_aniso_U_12
 Br 0.0863(8) 0.0849(7) 0.0685(6) 0.0083(4) 0.0359(5) 0.0013(4)
 O 0.037(2) 0.043(2) 0.053(2) -0.0035(18) -0.0003(18) 0.0012(18)
 O003 0.076(4) 0.079(3) 0.057(3) 0.012(2) 0.020(3) -0.008(3)
 N004 0.062(4) 0.045(2) 0.050(3) 0.010(2) 0.008(3) 0.001(3)
 C005 0.043(3) 0.035(3) 0.037(3) -0.004(2) -0.006(2) -0.001(3)
 C006 0.045(4) 0.039(3) 0.043(3) -0.005(2) 0.004(3) 0.004(3)
 C007 0.051(4) 0.041(3) 0.043(3) 0.000(3) -0.004(3) 0.001(3)
 C008 0.055(4) 0.053(3) 0.049(3) -0.010(3) 0.012(3) -0.001(3)
 C009 0.043(3) 0.037(3) 0.039(3) 0.000(2) 0.005(2) -0.001(3)
 C00A 0.037(4) 0.056(3) 0.061(4) -0.011(3) 0.010(3) 0.012(3)
 C00B 0.062(4) 0.048(3) 0.045(3) 0.001(3) 0.002(3) -0.006(3)
 C00C 0.055(4) 0.052(3) 0.057(4) -0.001(3) -0.002(3) 0.010(3)
 C00D 0.062(5) 0.072(4) 0.066(4) -0.006(4) -0.013(4) -0.024(3)
 C00E 0.037(4) 0.071(4) 0.080(4) 0.003(3) 0.004(3) 0.015(3)
 C00F 0.092(7) 0.061(4) 0.066(4) 0.025(3) 0.000(4) 0.009(4)
 C00G 0.107(8) 0.137(8) 0.079(5) 0.036(5) 0.021(5) 0.076(7)
 C00H 0.103(8) 0.102(6) 0.145(8) 0.042(6) 0.086(7) 0.041(6)
 C00I 0.104(3) 0.104(3) 0.104(3) -0.0002(5) 0.0088(5) 0.0001(5)

_geom_special_details
;
 All esds (except the esd in the dihedral angle between two l.s. planes)
 are estimated using the full covariance matrix.  The cell esds are taken
 into account individually in the estimation of esds in distances, angles
 and torsion angles; correlations between esds in cell parameters are only
 used when they are defined by crystal symmetry.  An approximate (isotropic)
 treatment of cell esds is used for estimating esds involving l.s. planes.
;
loop_
  _geom_bond_atom_site_label_1
  _geom_bond_atom_site_label_2
  _geom_bond_distance
  _geom_bond_site_symmetry_2
  _geom_bond_publ_flag
 Br C008 1.908(6) . ?
 O C009 1.411(7) . ?
 O C00E 1.464(7) . ?
 O003 C00B 1.218(7) . ?
 N004 C006 1.407(7) . ?
 N004 C00B 1.365(8) . ?
 N004 C00F 1.457(7) . ?
 C005 C006 1.383(7) . ?
 C005 C007 1.384(8) . ?
 C005 C009 1.503(8) . ?
 C006 C00C 1.367(9) . ?
 C007 H007 0.9300 . ?
 C007 C008 1.384(9) . ?
 C008 C00A 1.379(9) . ?
 C009 C00B 1.555(8) . ?
 C009 C00D 1.541(9) . ?
 C00A H00A 0.9300 . ?
 C00A C00C 1.400(8) . ?
 C00C H00C 0.9300 . ?
 C00D H00B 0.9700 . ?
 C00D H00D 0.9700 . ?
 C00D C00I 1.424(12) . ?
 C00E C00G 1.490(11) . ?
 C00E C00H 1.504(9) . ?
 C00E C00I 1.612(12) . ?
 C00F H00E 0.9600 . ?
 C00F H00F 0.9600 . ?
 C00F H00G 0.9600 . ?
 C00G H00H 0.9600 . ?
 C00G H00I 0.9600 . ?
 C00G H00J 0.9600 . ?
 C00H H00K 0.9600 . ?
 C00H H00L 0.9600 . ?
 C00H H00M 0.9600 . ?
 C00I H00N 0.9700 . ?
 C00I H00O 0.9700 . ?

loop_
  _geom_angle_atom_site_label_1
  _geom_angle_atom_site_label_2
  _geom_angle_atom_site_label_3
  _geom_angle
  _geom_angle_site_symmetry_1
  _geom_angle_site_symmetry_3
  _geom_angle_publ_flag
 C009 O C00E 112.4(4) . . ?
 C006 N004 C00F 125.0(6) . . ?
 C00B N004 C006 111.1(5) . . ?
 C00B N004 C00F 123.3(5) . . ?
 C006 C005 C007 120.9(5) . . ?
 C006 C005 C009 109.6(5) . . ?
 C007 C005 C009 129.6(5) . . ?
 C005 C006 N004 109.6(5) . . ?
 C00C C006 N004 128.1(5) . . ?
 C00C C006 C005 122.3(5) . . ?
 C005 C007 H007 121.5 . . ?
 C005 C007 C008 117.0(5) . . ?
 C008 C007 H007 121.5 . . ?
 C007 C008 Br 119.0(5) . . ?
 C00A C008 Br 118.8(5) . . ?
 C00A C008 C007 122.2(6) . . ?
 O C009 C005 113.4(4) . . ?
 O C009 C00B 111.2(4) . . ?
 O C009 C00D 104.8(5) . . ?
 C005 C009 C00B 101.2(5) . . ?
 C005 C009 C00D 115.7(5) . . ?
 C00D C009 C00B 110.8(5) . . ?
 C008 C00A H00A 119.8 . . ?
 C008 C00A C00C 120.4(6) . . ?
 C00C C00A H00A 119.8 . . ?
 O003 C00B N004 125.7(6) . . ?
 O003 C00B C009 126.6(6) . . ?
 N004 C00B C009 107.7(5) . . ?
 C006 C00C C00A 117.2(6) . . ?
 C006 C00C H00C 121.4 . . ?
 C00A C00C H00C 121.4 . . ?
 C009 C00D H00B 110.1 . . ?
 C009 C00D H00D 110.1 . . ?
 H00B C00D H00D 108.5 . . ?
 C00I C00D C009 107.8(6) . . ?
 C00I C00D H00B 110.1 . . ?
 C00I C00D H00D 110.1 . . ?
 O C00E C00G 107.8(6) . . ?
 O C00E C00H 108.9(6) . . ?
 O C00E C00I 100.4(6) . . ?
 C00G C00E C00H 109.2(6) . . ?
 C00G C00E C00I 102.7(7) . . ?
 C00H C00E C00I 126.5(8) . . ?
 N004 C00F H00E 109.5 . . ?
 N004 C00F H00F 109.5 . . ?
 N004 C00F H00G 109.5 . . ?
 H00E C00F H00F 109.5 . . ?
 H00E C00F H00G 109.5 . . ?
 H00F C00F H00G 109.5 . . ?
 C00E C00G H00H 109.5 . . ?
 C00E C00G H00I 109.5 . . ?
 C00E C00G H00J 109.5 . . ?
 H00H C00G H00I 109.5 . . ?
 H00H C00G H00J 109.5 . . ?
 H00I C00G H00J 109.5 . . ?
 C00E C00H H00K 109.5 . . ?
 C00E C00H H00L 109.5 . . ?
 C00E C00H H00M 109.5 . . ?
 H00K C00H H00L 109.5 . . ?
 H00K C00H H00M 109.5 . . ?
 H00L C00H H00M 109.5 . . ?
 C00D C00I C00E 102.8(7) . . ?
 C00D C00I H00N 111.2 . . ?
 C00D C00I H00O 111.2 . . ?
 C00E C00I H00N 111.2 . . ?
 C00E C00I H00O 111.2 . . ?
 H00N C00I H00O 109.1 . . ?

loop_
  _geom_torsion_atom_site_label_1
  _geom_torsion_atom_site_label_2
  _geom_torsion_atom_site_label_3
  _geom_torsion_atom_site_label_4
  _geom_torsion
  _geom_torsion_site_symmetry_1
  _geom_torsion_site_symmetry_2
  _geom_torsion_site_symmetry_3
  _geom_torsion_site_symmetry_4
  _geom_torsion_publ_flag
 Br C008 C00A C00C 178.7(5) . . . . ?
 O C009 C00B O003 50.4(8) . . . . ?
 O C009 C00B N004 -130.3(5) . . . . ?
 O C009 C00D C00I 15.2(8) . . . . ?
 O C00E C00I C00D 33.6(8) . . . . ?
 N004 C006 C00C C00A -177.1(5) . . . . ?
 C005 C006 C00C C00A 1.2(9) . . . . ?
 C005 C007 C008 Br -178.2(4) . . . . ?
 C005 C007 C008 C00A 2.1(9) . . . . ?
 C005 C009 C00B O003 171.0(6) . . . . ?
 C005 C009 C00B N004 -9.6(6) . . . . ?
 C005 C009 C00D C00I -110.4(7) . . . . ?
 C006 N004 C00B O003 -171.8(6) . . . . ?
 C006 N004 C00B C009 8.9(7) . . . . ?
 C006 C005 C007 C008 -0.9(8) . . . . ?
 C006 C005 C009 O 126.4(5) . . . . ?
 C006 C005 C009 C00B 7.3(6) . . . . ?
 C006 C005 C009 C00D -112.5(6) . . . . ?
 C007 C005 C006 N004 177.9(5) . . . . ?
 C007 C005 C006 C00C -0.7(9) . . . . ?
 C007 C005 C009 O -54.2(7) . . . . ?
 C007 C005 C009 C00B -173.2(5) . . . . ?
 C007 C005 C009 C00D 66.9(8) . . . . ?
 C007 C008 C00A C00C -1.6(9) . . . . ?
 C008 C00A C00C C006 -0.1(9) . . . . ?
 C009 O C00E C00G -132.9(6) . . . . ?
 C009 O C00E C00H 108.8(6) . . . . ?
 C009 O C00E C00I -25.8(7) . . . . ?
 C009 C005 C006 N004 -2.6(6) . . . . ?
 C009 C005 C006 C00C 178.8(5) . . . . ?
 C009 C005 C007 C008 179.7(5) . . . . ?
 C009 C00D C00I C00E -30.0(9) . . . . ?
 C00B N004 C006 C005 -4.2(7) . . . . ?
 C00B N004 C006 C00C 174.3(6) . . . . ?
 C00B C009 C00D C00I 135.2(7) . . . . ?
 C00D C009 C00B O003 -65.8(8) . . . . ?
 C00D C009 C00B N004 113.6(6) . . . . ?
 C00E O C009 C005 135.7(5) . . . . ?
 C00E O C009 C00B -111.1(6) . . . . ?
 C00E O C009 C00D 8.7(6) . . . . ?
 C00F N004 C006 C005 -175.1(6) . . . . ?
 C00F N004 C006 C00C 3.4(10) . . . . ?
 C00F N004 C00B O003 -0.7(10) . . . . ?
 C00F N004 C00B C009 180.0(5) . . . . ?
 C00G C00E C00I C00D 144.7(7) . . . . ?
 C00H C00E C00I C00D -89.4(10) . . . . ?

_shelx_res_file
;
TITL exp_1410_a.res in P2(1)/c
REM Old TITL exp_1410 in P21/c #14
REM SHELXT solution in P2(1)/c
REM R1 0.235, Rweak 0.028, Alpha 0.036, Orientation as input
REM Formula found by SHELXT: C14 O2 N Br
CELL 0.71073 9.216234 11.903121 12.665456 90 95.0018 90
ZERR 6 0.001779 0.001837 0.001985 0 0.0153 0
LATT 1
SYMM -X,0.5+Y,0.5-Z
SFAC C H Br N O
UNIT 56 56 4 4 8
DELU 0.01 0.005 C00I
DELU 0.01 0.005 C00I C00E
DELU 0.005 0.00025 C00D C00I
DELU 0.005 0.0025 C00E C00I
SIMU 0.01 0.02 3.8 C00I
SIMU 0.001 0.002 3.8 C00I
ISOR 0.05 0.1 C00I
ISOR 0.05 0.1 C00I
ISOR 0.01 0.02 C00I
ISOR 0.01 0.02 C00I
ISOR 0.005 0.01 C00I
ISOR 0.0005 0.001 C00I

L.S. 10
PLAN  20
BOND $H
LIST 6
fmap 2
MORE -1
ACTA 52
CONF
REM <olex2.extras>
REM <HklSrc "%.\\exp_1410.hkl">
REM </olex2.extras>

WGHT    0.131500    0.234900
FVAR       0.62866
BR    3    0.650862    0.745742    0.389331    11.00000    0.08630    0.08489 =
         0.06852    0.00828    0.03589    0.00127
O     5    0.240287    0.810532    0.708854    11.00000    0.03700    0.04347 =
         0.05331   -0.00352   -0.00033    0.00119
O003  5    0.197312    0.619674    0.854240    11.00000    0.07625    0.07901 =
         0.05718    0.01232    0.01992   -0.00755
N004  4    0.386125    0.550090    0.766465    11.00000    0.06246    0.04520 =
         0.05017    0.01012    0.00772    0.00109
C005  1    0.386244    0.670318    0.626404    11.00000    0.04330    0.03516 =
         0.03741   -0.00377   -0.00557   -0.00053
C006  1    0.459518    0.582175    0.678423    11.00000    0.04532    0.03901 =
         0.04302   -0.00478    0.00436    0.00435
C007  1    0.439369    0.719829    0.538741    11.00000    0.05139    0.04087 =
         0.04314    0.00046   -0.00385    0.00072
AFIX  43
H007  2    0.390185    0.778427    0.502639    11.00000   -1.20000
AFIX   0
C008  1    0.569024    0.678209    0.507203    11.00000    0.05495    0.05270 =
         0.04906   -0.00969    0.01219   -0.00104
C009  1    0.250730    0.696656    0.679643    11.00000    0.04251    0.03696 =
         0.03890   -0.00037    0.00456   -0.00124
C00A  1    0.640876    0.589127    0.557858    11.00000    0.03675    0.05556 =
         0.06136   -0.01079    0.01024    0.01196
AFIX  43
H00A  2    0.726548    0.562218    0.533370    11.00000   -1.20000
AFIX   0
C00B  1    0.271013    0.619582    0.778960    11.00000    0.06154    0.04831 =
         0.04470    0.00063    0.00174   -0.00623
C00C  1    0.585639    0.538927    0.645949    11.00000    0.05531    0.05179 =
         0.05679   -0.00082   -0.00173    0.00967
AFIX  43
H00C  2    0.632759    0.478701    0.680896    11.00000   -1.20000
AFIX   0
C00D  1    0.105675    0.670991    0.614201    11.00000    0.06226    0.07239 =
         0.06639   -0.00623   -0.01280   -0.02441
AFIX  23
H00B  2    0.123521    0.628772    0.551117    11.00000   -1.20000
H00D  2    0.043174    0.626627    0.655781    11.00000   -1.20000
AFIX   0
C00E  1    0.094233    0.856337    0.682493    11.00000    0.03705    0.07061 =
         0.07990    0.00253    0.00375    0.01497
C00F  1    0.437459    0.465825    0.844391    11.00000    0.09185    0.06076 =
         0.06612    0.02536   -0.00048    0.00902
AFIX 137
H00E  2    0.436135    0.393214    0.811331    11.00000   -1.50000
H00F  2    0.374989    0.465112    0.901206    11.00000   -1.50000
H00G  2    0.535077    0.483624    0.871983    11.00000   -1.50000
AFIX   0
C00G  1    0.110459    0.966648    0.629113    11.00000    0.10656    0.13658 =
         0.07866    0.03602    0.02078    0.07572
AFIX 137
H00H  2    0.164121    1.017253    0.676903    11.00000   -1.50000
H00I  2    0.015864    0.997536    0.608957    11.00000   -1.50000
H00J  2    0.161845    0.956210    0.567093    11.00000   -1.50000
AFIX   0
C00H  1    0.022442    0.874331    0.783317    11.00000    0.10250    0.10239 =
         0.14538    0.04211    0.08634    0.04088
AFIX 137
H00K  2    0.034567    0.808394    0.826840    11.00000   -1.50000
H00L  2   -0.079511    0.888587    0.766670    11.00000   -1.50000
H00M  2    0.066443    0.937497    0.820802    11.00000   -1.50000
AFIX   0
C00I  1    0.037654    0.775371    0.585522    11.00000    0.10367    0.10365 =
         0.10370   -0.00022    0.00878    0.00007
AFIX  23
H00N  2   -0.067624    0.768602    0.579790    11.00000   -1.20000
H00O  2    0.068253    0.802907    0.518880    11.00000   -1.20000
AFIX   0
HKLF 4

REM  exp_1410_a.res in P2(1)/c
REM R1 =  0.0914 for    1519 Fo > 4sig(Fo)  and  0.1689 for all    3147 data
REM    166 parameters refined using      8 restraints

END

WGHT      0.1314      0.2345

REM Highest difference peak  1.739,  deepest hole -1.082,  1-sigma level  0.137
Q1    1   0.0044  0.7405  0.6608  11.00000  0.05    1.74
Q2    1   0.4454  0.2692  0.7855  11.00000  0.05    0.36
Q3    1   0.5414  0.7235  0.7005  11.00000  0.05    0.36
Q4    1  -0.0887  0.7766  0.9218  11.00000  0.05    0.35
Q5    1   0.6822  0.7582  0.2265  11.00000  0.05    0.33
Q6    1   0.6056  0.7539  0.2751  11.00000  0.05    0.32
Q7    1   0.3745  0.3208  0.7336  11.00000  0.05    0.31
Q8    1  -0.0156  0.8053  0.7642  11.00000  0.05    0.31
Q9    1   0.3555  0.2508  0.8380  11.00000  0.05    0.30
Q10   1   0.4127  0.7962  0.3863  11.00000  0.05    0.29
Q11   1   0.7289  0.7326  0.5608  11.00000  0.05    0.28
Q12   1   0.3974  0.8635  0.7189  11.00000  0.05    0.28
Q13   1   0.3862  0.7398  0.3463  11.00000  0.05    0.28
Q14   1   0.2725  0.7433  0.4661  11.00000  0.05    0.28
Q15   1   0.4049  0.5378  0.5777  11.00000  0.05    0.27
Q16   1   0.1874  0.6749  0.4985  11.00000  0.05    0.27
Q17   1   0.6054  0.4772  0.9700  11.00000  0.05    0.26
Q18   1   0.5483  0.4611  0.4989  11.00000  0.05    0.26
Q19   1   0.1829  1.0275  0.7153  11.00000  0.05    0.26
Q20   1   0.6038  0.3343  0.6967  11.00000  0.05    0.25
;
_shelx_res_checksum               4891
_shelx_hkl_file
;
   0   0   2 1471.70   34.06
   0   0   3   -1.26    2.51
   0   0   4 5119.78   89.24
   0   0  -5   -0.92    2.24
   0   0   5    0.08    3.20
   0   0   6    9.99    3.97
   0   0  -6    6.04    3.86
   0   0   7    0.98    3.43
   0   0   8  755.54   48.67
   0   0   9    3.56    4.03
   0   0 -10  192.78   28.56
   0   0  10  195.56   29.30
   0   0 -11  -20.35   17.49
   0   0  11    6.59    6.52
   0   0 -12   81.75   19.91
   0   0  12   99.18   23.33
   0   0 -13  -11.85   12.79
   0   0  13    4.62    9.78
   0   0  14   56.74   22.40
   0   0 -14   36.44   16.07
   0   0 -15    0.32    6.51
   0   0  15   26.42   18.81
   0   0  16   20.48   16.39
   0   0  17   29.35   19.63
   0  -1   2  107.43   10.36
   0   1   2  115.37    8.23
   0  -1   2  119.49   11.32
   0  -1  -2  116.09    6.56
   0   1   3  514.99   22.05
   0  -1  -3  512.82   23.17
   0  -1   3  517.74   27.16
   0   1   4  396.34   22.83
   0  -1  -4  410.57   24.69
   0  -1   4  431.60   27.79
   0   1  -4  459.63   29.61
   0   1   5    7.94    3.60
   0  -1  -5    8.43    4.71
   0  -1   5   12.17    4.69
   0   1  -5    9.34    2.74
   0  -1   6 2387.09   79.36
   0   1   6 2315.89   70.06
   0   1  -6 2299.32   81.38
   0  -1  -6 2321.17   73.22
   0  -1   7   10.91    5.44
   0   1  -7   10.19    4.37
   0   1   7   13.89    5.89
   0   1  -8  810.49   55.01
   0   1   8  755.83   48.27
   0  -1   8  771.14   51.74
   0  -1   9   39.02   11.25
   0   1   9   48.74   12.95
   0   1  -9   37.30    9.72
   0  -1  10  239.39   32.09
   0   1  10  253.97   32.89
   0   1 -10  228.47   32.11
   0   1 -11   20.64    9.11
   0  -1  11   23.44   10.91
   0   1  11   30.02   13.03
   0  -1  12   33.44   13.73
   0   1 -12   23.45   11.50
   0   1  12   36.90   15.72
   0   1  13   43.09   18.72
   0   1 -13   30.64   14.01
   0  -1  13   28.71   13.91
   0   1  14   24.88   15.98
   0  -1 -14  -16.30   19.58
   0  -1  14    8.86   11.76
   0   1 -14    4.37   10.32
   0   1  15   22.03   17.65
   0  -1  15   20.69   15.37
   0  -1 -15  -14.67   18.21
   0   1 -15   17.87   13.56
   0   1  16   47.03   21.97
   0  -1  16   23.87   19.50
   0  -2   0 5591.42   52.18
   0  -2   1  616.76   22.73
   0  -2  -2 1260.52   24.81
   0  -2   2 1190.18   38.48
   0   2   2 1182.79   27.71
   0   2   3  595.20   21.89
   0  -2  -3  577.73   22.04
   0  -2   3  593.10   31.51
   0  -2  -3  573.20   19.70
   0  -2   3  537.77   30.53
   0  -2  -4 1495.78   32.70
   0  -2   4 1491.49   59.40
   0  -2  -4 1404.86   41.88
   0  -2   4 1387.20   53.18
   0   2  -4 1420.67   51.22
   0   2   4 1342.55   39.80
   0  -2   5   16.28    6.08
   0  -2  -5   18.48    5.29
   0  -2  -5   19.05    3.76
   0  -2  -5   16.20    2.54
   0   2  -5   20.65    8.20
   0   2   5   19.62    6.25
   0  -2  -6  430.19   19.17
   0   2   6  457.03   29.90
   0  -2  -6  437.47   31.32
   0  -2   6  444.44   35.88
   0   2  -6  459.89   35.39
   0  -2   7   -0.86    6.00
   0   2   7    5.35    5.58
   0   2  -7    4.00    6.15
   0  -2  -7    1.53    2.18
   0  -2  -7    2.85    2.17
   0   2  -8  381.73   36.79
   0   2   8  381.68   32.68
   0  -2  -8  358.81   19.06
   0  -2   8  369.62   36.28
   0  -2   9  117.83   22.62
   0   2   9  140.44   21.79
   0  -2  -9  125.47   11.20
   0  -2  -9  127.54   12.02
   0   2  -9  136.60   23.33
   0  -2  10  644.81   55.21
   0   2 -10  712.21   54.38
   0  -2 -10  637.33   27.95
   0   2  10  712.42   52.58
   0  -2 -11    5.90    3.46
   0   2 -11   11.71    9.84
   0  -2  11    1.18    5.70
   0   2  11   15.80   10.90
   0  -2  12   91.65   22.51
   0   2  12  112.10   24.42
   0   2 -12  108.68   24.41
   0   2 -13   15.24   13.02
   0  -2  13    7.43    6.55
   0   2  13   15.17   12.51
   0   2  14   91.71   25.83
   0   2 -14  105.38   29.00
   0  -2  14   96.68   26.90
   0   2 -15   19.67   16.56
   0   2  15   23.14   16.16
   0  -2  15    5.53   11.86
   0  -2 -15  -31.98   27.08
   0  -2  16   11.87   15.19
   0  -3   0    1.63    0.92
   0   3  -1 1109.11   34.45
   0  -3   1 1110.10   34.95
   0  -3   2 3517.97   71.87
   0   3   2 3478.69   58.96
   0  -3   3   10.42    4.25
   0  -3  -3   10.42    3.02
   0   3   3   10.83    3.44
   0  -3  -4  859.61   30.19
   0  -3   4  895.38   45.25
   0  -3   4  815.33   43.05
   0  -3   5  241.51   26.93
   0  -3  -5  219.74   15.29
   0  -3   5  200.56   23.45
   0  -3  -5  199.12   17.42
   0  -3  -6 2170.14   48.45
   0  -3  -6 2174.05   64.36
   0  -3   6 2123.44   81.43
   0   3   6 2126.52   61.20
   0   3   7  228.22   21.71
   0  -3  -7  217.87   22.38
   0  -3  -7  218.01   15.45
   0  -3   7  231.71   27.33
   0  -3   8  105.58   19.94
   0   3   8  119.16   17.88
   0   3  -8  131.72   22.81
   0  -3  -8  125.14   11.85
   0  -3   9   24.50    9.36
   0   3   9   35.18   12.28
   0  -3  -9   30.23    6.16
   0  -3  -9   29.33    4.89
   0  -3  -9   19.47    4.17
   0   3  -9   52.41   17.38
   0   3  10   10.60    7.65
   0  -3 -10   25.19    5.32
   0   3 -10   21.58   11.63
   0  -3  10    2.78    5.10
   0   3  11   14.42    9.87
   0  -3  11   -4.54    8.30
   0   3 -11   27.43   14.71
   0   3  12  215.14   32.02
   0   3 -12  213.19   34.59
   0  -3  12  171.13   32.10
   0  -3  13    3.72    6.07
   0  -3  14   23.71   13.52
   0  -3  15    0.49    9.15
   0  -4   0 1566.29   40.31
   0  -4  -1  406.92   16.60
   0  -4   1  402.52   23.27
   0   4  -1  398.34   22.30
   0   4   2  762.56   32.48
   0   4  -2  747.24   36.00
   0  -4   2  775.68   36.08
   0   4  -3  549.14   35.21
   0   4   3  556.66   27.40
   0  -4  -3  541.12   19.11
   0  -4   3  584.78   35.02
   0  -4  -4 2154.55   44.23
   0   4   4 2146.53   55.50
   0  -4   4 2071.72   72.92
   0  -4   4 2170.44   73.90
   0  -4  -5  202.81   15.97
   0  -4   5  185.13   23.32
   0  -4   6  409.73   37.48
   0  -4  -6  427.68   27.46
   0  -4   7   11.32    8.16
   0  -4  -7    4.70    3.03
   0  -4   8  454.90   43.72
   0  -4  -8  467.48   34.24
   0  -4   9   17.74    6.76
   0  -4  10  103.54   21.34
   0  -4  11   -7.88    8.94
   0  -4  12    5.68    7.50
   0  -4  13   17.60    6.01
   0  -4  14   53.83   21.12
   0  -4  15   15.99   14.46
   0  -5   0   -0.89    1.45
   0  -5  -1  154.78   12.22
   0   5  -1  150.93   15.94
   0  -5   1  159.74   15.99
   0  -5   2 1004.63   44.67
   0   5  -2  981.50   44.41
   0  -5   3   22.02    6.55
   0   5  -3   22.16    6.90
   0   5   3   25.38    6.88
   0  -5  -4  152.84   11.29
   0  -5   4  147.95   20.87
   0   5   4  154.33   16.69
   0  -5  -5   11.84    2.84
   0  -5   5   13.79    7.30
   0   5   5    9.77    3.84
   0  -5  -6  524.05   27.82
   0  -5   6  490.79   42.55
   0  -5  -7  233.39   21.39
   0  -5   7  240.63   30.78
   0  -5   8  571.97   51.28
   0  -5  -8  620.79   37.67
   0  -5   9   14.20    4.25
   0  -5  10  173.78   29.08
   0  -5  11    2.04    5.17
   0  -5  12  155.61   30.30
   0  -5  13   -2.09    6.70
   0  -5  14   11.07   10.50
   0  -6   0  849.70   36.49
   0  -6   1   37.44    8.15
   0  -6  -1   36.57    6.38
   0   6  -2  107.09   15.94
   0  -6   2  116.98   16.10
   0  -6  -2  118.90   10.61
   0  -6   3   97.41   16.21
   0   6   3  104.71   15.04
   0   6   4  628.92   36.85
   0  -6  -4  593.88   22.20
   0  -6   4  617.35   43.78
   0   6   5   83.27    8.08
   0   6   5   94.03    7.14
   0  -6   5   96.23   17.51
   0   6   5   96.56   14.46
   0  -6  -5   91.51    9.21
   0  -6  -6  323.57   20.21
   0  -6   6  315.28   35.60
   0  -6   7   64.27   18.18
   0  -6  -7   65.22   10.26
   0  -6  -8   25.18    6.92
   0  -6   8   15.11    6.18
   0  -6   9   -5.95   11.93
   0  -6  10   23.53   10.36
   0  -6  11   -2.47    6.98
   0  -6  12   -9.26   12.15
   0  -6  13   24.62   12.53
   0  -6  14   56.54   21.77
   0  -7   0   -0.83    1.64
   0  -7   1  221.65   22.26
   0  -7  -1  223.95   18.24
   0  -7   2 3069.01   90.14
   0  -7  -2 3249.21   62.75
   0   7  -2 3082.57   90.72
   0   7   2 3082.38   87.55
   0   7   3  104.97   16.29
   0  -7  -3   99.87    9.61
   0  -7   3   96.15   17.55
   0  -7   4   31.49   10.56
   0  -7  -4   33.23    5.11
   0   7   4   37.54   10.51
   0  -7  -5    4.39    1.58
   0   7   5    4.47    2.03
   0  -7   5    5.36    5.10
   0   7   5    4.43    2.36
   0  -7   6  636.34   52.30
   0  -7  -6  620.55   25.68
   0   7   6  701.16   45.01
   0  -7  -7   33.17    6.69
   0  -7   7   27.68   11.63
   0  -7   8   96.45   21.93
   0  -7   9   38.64   12.48
   0  -7  10  169.11   31.55
   0  -7  11   -8.36   10.23
   0  -7  12   25.95   12.49
   0  -7  13    2.51    2.95
   0  -8   0  138.11   17.41
   0  -8  -1   -0.17    2.29
   0  -8   1   -0.13    1.45
   0  -8  -2   32.81    6.74
   0  -8   2   31.52    9.47
   0   8   2   35.76   10.30
   0  -8   3   10.24    6.14
   0   8   3   10.44    6.22
   0  -8  -3    9.68    2.78
   0  -8   4  556.41   45.64
   0  -8  -4  580.80   22.35
   0   8   4  581.97   41.81
   0  -8  -5    7.95    2.38
   0  -8  -5    6.06    1.79
   0   8   5   11.97    7.01
   0  -8   5   10.36    5.07
   0   8   6  116.11   18.94
   0   8   6   97.29    9.42
   0  -8   6  101.48   22.01
   0   8   6   99.33   10.28
   0  -8   7  241.69   35.31
   0  -8   8   92.82   22.08
   0  -8   9    6.55    6.97
   0  -8  10    2.07    6.55
   0  -8  11    7.28    4.86
   0  -8  12    4.14    5.68
   0  -8  13    0.73    5.06
   0  -9   0   -0.06    1.61
   0  -9   1    3.68    2.63
   0  -9  -1    6.34    3.83
   0  -9  -2  621.66   31.70
   0   9   2  605.69   44.68
   0  -9   2  606.03   44.78
   0  -9  -3    2.61    1.75
   0   9   3   -1.48    0.99
   0  -9   3    4.92    3.68
   0  -9   4   11.90    6.77
   0  -9  -4    9.40    2.91
   0   9   4   12.53    7.55
   0   9   5   10.85    5.15
   0  -9   5   11.95    8.23
   0   9   6    5.55    2.85
   0  -9   6    8.05    6.76
   0  -9   7   35.39   14.81
   0  -9   8  119.90   23.47
   0  -9   9  -11.60   12.66
   0  -9  10    3.11    7.08
   0  -9  11  -16.74   14.47
   0  -9  12   30.02   13.97
   0 -10   0  160.21   20.94
   0  10   1   25.09    8.95
   0 -10   1   30.04    9.78
   0 -10  -1   25.90    7.45
   0 -10  -2   -0.24    1.74
   0  10   2    1.31    4.23
   0 -10   2   -0.21    2.78
   0 -10   3   67.65   16.55
   0  10   3   65.64   16.43
   0  10   4  232.43   30.97
   0 -10   4  225.83   32.29
   0  10   5   56.70   15.49
   0 -10   5   53.63   15.85
   0 -10   6   50.85   17.84
   0  10   6   44.41   12.81
   0 -10   7   -5.04    8.83
   0  10   7   -4.61   10.92
   0 -10   8  144.12   28.96
   0 -10   9   -0.37    9.11
   0 -10  10   -5.33   11.66
   0 -10  11   -6.50   12.30
   0  11   0   -2.27    2.30
   0 -11   0   -0.46    2.57
   0  11   1    8.09    6.38
   0 -11  -1    8.89    4.68
   0 -11   1   10.29    5.55
   0  11   2   87.56   19.02
   0 -11   2  100.35   19.74
   0  11   3    5.15    5.40
   0 -11   3    0.52    5.14
   0  11   4   24.06   10.66
   0 -11   4   19.55   10.82
   0 -11   5    6.33    6.25
   0  11   5   10.90    9.95
   0  11   6   31.68   12.45
   0 -11   6   15.28   10.47
   0 -11   7  -11.52   12.25
   0  11   7   -9.75   11.21
   0 -11   8   -5.94   11.81
   0 -11   9  -12.51   12.55
   0 -11  10    0.93    7.56
   0 -11  11    2.31    3.65
   0  12   0   29.04   11.72
   0  12   1    0.99    1.68
   0 -12   1    2.56    2.69
   0  12  -1    1.97    2.48
   0 -12   2   41.22   13.22
   0  12   2   40.61   14.07
   0  12   3   15.60    9.39
   0 -12   3   16.27    9.73
   0 -12   4   97.01   21.74
   0  12   4   88.25   21.71
   0  12   5   24.40   11.32
   0 -12   5    1.19   10.17
   0  12   6   -0.55    6.13
   0 -12   6   -7.40   10.52
   0 -12   7   -2.39   10.82
   0  12   7   -5.17   12.56
   0 -12   8   -4.24   10.80
   0 -12   9   -0.39    6.04
   0 -12  10    8.23    1.85
   0  13   0    2.39    4.51
   0  13   1   10.00    8.72
   0  13  -1    7.91    5.14
   0  13  -2   -3.19    7.20
   0  13   2    5.77    8.65
   0  13   3   18.94   10.23
   0 -13   4    4.55    3.71
   0  13   4   13.34   10.46
   0 -13   5  -17.36   11.90
   0  13   5   18.85   12.33
   0 -13   6  -11.69   11.77
   0  13   6   -0.23    2.47
   0  13   7   -7.07   13.08
   0 -13   7   -5.23    7.99
   0 -13   8   -7.58   11.52
   0 -13   9  -17.88   14.36
   0  14   0   62.92   19.05
   0  14   1    3.74    4.91
   0  14  -1    7.47    5.35
   0  14  -2   -6.21    8.81
   0  14   2   -0.20    2.39
   0  14   3   14.07   11.74
   0  14  -3    9.34    7.63
   0  14  -4   16.99    9.02
   0  14   4   16.64   12.60
   0  14   5    2.28    3.11
   0  14   6   -6.25   13.77
   0 -14   7   -3.01    9.94
   0 -14   8   19.05    9.69
   0  15   1   16.24   12.84
   0  15   2   29.69   15.27
   0  15   3    0.99    7.53
   0  15   4   21.35   13.77
   0  15   5    3.86    6.31
   0  15   6   -9.24   11.05
  -1   0  17   24.23   20.04
  -1   0  16   58.42   22.40
  -1   0  15   15.13   14.99
   1   0 -14    8.17    7.16
  -1   0  14    2.69    6.34
   1   0 -13   -2.20    5.14
  -1   0  13    1.26    4.66
   1   0 -12  663.74   58.17
  -1   0  12  645.79   57.78
  -1   0  11    0.52    3.44
   1   0 -11   -8.95   10.65
  -1   0  10   14.06    4.95
   1   0 -10    8.30    7.70
  -1   0   9   -4.85    7.61
   1   0  -9  -19.58   14.01
  -1   0   8 1862.36   79.09
  -1   0   7    3.14    3.21
   1   0  -6  849.73   44.50
  -1   0   6  908.82   46.92
   1   0  -5    1.28    2.06
  -1   0   5   -0.19    2.26
  -1   0   4  770.75   34.49
   1   0  -4  766.94   33.64
  -1   0   3    2.14    0.76
  -1   0   2 1589.99   34.97
  -1   0  -2 6877.03   68.78
  -1   0  -3   -0.50    1.21
   1   0   3    2.40    2.70
   1   0   4   30.71    7.73
  -1   0  -5    2.16    2.16
   1   0   5    1.91    4.35
   1   0   6  774.04   44.22
   1   0   7    1.53    4.18
   1   0   8   35.68   12.95
   1   0   9    4.84    9.44
   1   0  10   80.63   19.92
  -1   0 -11   -2.60    3.83
   1   0  11   24.95   14.42
  -1   0 -12  207.06   38.20
  -1   0 -12  198.65   23.97
   1   0  12  251.92   38.81
  -1   0 -13  -21.82   21.91
   1   0  13   20.73   15.33
  -1   0 -14   77.72   23.34
   1   0  14  101.68   27.64
  -1   0 -15   -9.83   12.12
   1   0  15   17.17   15.92
  -1   0 -16   10.12   13.81
  -1   1  16   31.85   19.84
  -1  -1  16   25.98   19.40
  -1  -1  15    5.03    7.44
  -1   1  15   12.52   12.86
  -1   1  14   87.57   24.76
   1   1 -14   82.66   22.28
  -1  -1  14   58.29   20.69
   1  -1 -14   49.89   13.69
  -1  -1  13    4.87    5.88
   1  -1 -13   -6.70   14.85
   1   1 -13   28.10   14.57
  -1   1  13   14.06    9.72
   1   1 -12   48.91   14.28
  -1  -1  12   46.44   16.34
   1  -1 -12   32.60    8.08
  -1   1  12   57.69   17.57
   1   1 -11   10.26    7.80
  -1  -1  11   -2.59    8.67
  -1   1  11    5.21    4.20
   1   1 -10  329.77   35.41
  -1   1  10  318.48   35.45
  -1  -1  10  328.59   37.77
  -1  -1   9  108.81   20.86
   1   1  -9  116.46   19.76
  -1   1   9  109.81   18.71
  -1   1   8   -5.39    7.23
  -1  -1   8    4.12    5.39
   1   1  -8   -4.01    3.74
   1  -1  -7  319.82   27.56
  -1   1   7  328.25   28.69
  -1  -1   7  311.73   31.65
   1   1  -7  330.15   27.92
   1   1  -6 3092.09   80.42
   1   1  -6 3184.50   90.73
   1  -1  -6 3062.12   78.86
  -1   1   6 3199.65   83.82
  -1  -1   6 3154.63   92.62
  -1   1   5    4.65    2.71
   1  -1  -5    4.51    2.98
   1  -1  -5    3.58    2.00
  -1  -1   5   -0.78    1.48
   1   1  -5    5.81    3.33
  -1   1   4  739.03   31.96
   1  -1  -4  693.76   26.93
  -1  -1   4  723.64   36.13
   1   1  -4  770.98   30.12
   1  -1  -4  738.81   30.46
  -1   1   3   52.54    7.02
  -1  -1   3   58.42    8.45
  -1  -1   3   48.44    8.39
   1  -1  -3   51.97    6.64
   1  -1  -3   48.07    6.51
   1  -1  -2 5559.74   81.56
  -1   1   2 5478.00   67.56
  -1   1   1  103.06   10.36
  -1   1   0  133.14    8.97
   1  -1   1 2147.26   41.22
  -1  -1  -1 2094.87   46.16
   1  -1   1 2057.68   48.32
  -1   1  -1 2094.76   34.50
  -1  -1  -2  157.02   13.26
  -1   1  -2  157.22    9.10
   1  -1   2  152.70   13.67
   1   1   2  163.49   11.28
   1  -1   3  274.30   20.17
  -1  -1  -3  276.86   14.60
  -1  -1  -4 2157.78   40.98
   1   1   4 2251.14   59.98
   1  -1   4 2172.63   64.10
  -1  -1  -4 2174.77   62.00
   1  -1   5   68.82   12.57
   1   1   5   79.57   13.09
  -1  -1  -5   72.67    8.45
  -1  -1  -5   70.24   12.63
  -1  -1  -6   10.71    3.69
   1  -1   6   14.28    6.85
  -1   1  -6   10.81   10.47
   1   1   6   16.15    6.83
  -1  -1  -6    5.62    3.30
   1   1   7   10.80    7.71
  -1  -1  -7    5.44    2.59
   1  -1   7    5.92    4.02
  -1   1  -8 1557.63   86.83
   1  -1   8 1609.77   75.82
   1   1   8 1596.56   72.36
  -1  -1  -8 1612.16   48.73
  -1   1  -9   -5.84   11.00
   1  -1   9    3.98    6.17
  -1  -1  -9    1.19    2.93
   1   1   9   11.27    9.66
   1   1  10   40.23   14.95
  -1  -1 -10   38.68    8.65
   1  -1  10   33.50   12.03
  -1   1 -10    7.05   12.56
   1  -1  11   18.67   12.38
   1   1  11    4.99    8.13
  -1  -1 -11    6.86    5.11
  -1   1 -11   -2.65   11.43
  -1   1 -12   35.05   12.59
   1  -1  12   41.80   18.21
   1   1  12   50.88   18.35
   1   1  13   22.67   14.69
  -1   1 -13   -8.65   11.06
   1  -1  13   16.98   13.93
  -1   1 -14   24.03   13.91
   1  -1  14   35.25   17.46
   1  -1  15   30.46   19.14
  -1   1 -15   19.87   16.30
  -1  -1 -15  -17.55   20.11
  -1  -1 -16  -10.11   17.11
  -1   1 -16   45.56   21.60
   1  -1  16   26.68   19.04
  -1  -2  16   50.68   21.59
  -1   2  15   39.17   18.87
  -1  -2  15    7.78    8.23
  -1   2  14   34.25   17.83
  -1  -2  14   15.79    9.47
   1  -2 -14  -13.39   19.57
  -1  -2  13   -0.74    7.67
  -1   2  13   25.93   15.20
   1   2 -13   46.23   17.35
   1   2 -12  401.95   41.15
  -1   2  12  375.33   42.79
  -1  -2  12  338.32   44.31
  -1   2  11   62.04   16.20
   1   2 -11   78.73   18.83
  -1  -2  11   35.28   10.77
   1   2 -10    7.91    9.12
  -1   2  10    4.39    1.84
  -1  -2  10   -5.11   11.48
   1  -2 -10    1.20    2.03
  -1  -2   9   39.16   13.97
   1  -2  -9   42.49    8.18
   1   2  -9   48.79   14.00
  -1   2   9   37.36   11.50
   1  -2  -8 1413.52   45.47
  -1  -2   8 1547.23   76.41
  -1   2   8 1471.93   63.34
   1   2  -8 1546.99   64.78
  -1  -2   7  169.97   23.92
   1  -2  -7  169.90   14.24
  -1   2   7  172.89   19.63
   1  -2  -7  164.48   18.76
   1   2  -7  205.55   21.98
  -1   2   6   53.85    9.79
   1   2  -6   59.93   11.94
   1  -2  -6   55.37    9.77
  -1  -2   6   53.98   12.44
   1  -2  -6   50.85    7.67
  -1   2   5    5.40    2.49
  -1  -2   5    7.57    5.01
   1  -2  -5    3.49    2.05
   1  -2  -5    3.67    1.93
  -1  -2   5   -0.08    5.82
  -1   2   4  523.21   23.55
  -1  -2   4  496.13   31.63
  -1  -2   4  546.48   31.62
   1  -2  -4  505.15   22.63
   1  -2  -4  457.34   22.62
  -1   2   3    6.30    1.95
  -1  -2   3    5.25    2.05
   1  -2  -3    2.29    0.59
   1  -2  -3    4.34    1.79
   1  -2  -2 2110.83   34.24
  -1  -2   2 2077.13   52.47
  -1   2   2 2165.62   43.22
  -1   2   1  353.57   15.04
  -1   2   1  357.68   18.56
  -1   2   0  166.05   12.22
  -1   2   0  159.42   10.01
   1  -2   0  175.89    9.96
  -1   2  -1 3188.04   52.19
   1  -2   1 3240.29   55.29
   1   2   1 3201.74   53.98
   1   2   2 9999.00  114.21
   1  -2   2 9493.94  123.98
   1  -2   3  399.32   29.88
  -1  -2  -3  388.77   19.14
   1  -2   3  347.62   23.50
   1   2   3  388.00   17.65
  -1  -2  -4  241.57   20.20
   1  -2   4  233.57   21.25
  -1  -2  -4  228.35   17.21
   1  -2   5  562.03   36.72
  -1  -2  -5  606.28   34.55
  -1  -2  -5  598.36   25.72
  -1   2  -6  797.42   52.70
  -1  -2  -6  768.88   28.68
  -1  -2  -6  762.79   43.42
   1  -2   6  732.75   44.59
   1  -2   7    3.29    1.89
  -1   2  -7    1.55    3.82
  -1  -2  -7   -3.29    3.28
  -1   2  -8   -2.21    3.96
  -1  -2  -8   -0.20    1.87
   1  -2   8    0.38    2.74
   1  -2   9   11.71    8.32
  -1  -2  -9   18.70    4.80
   1   2   9   32.22   12.63
  -1   2  -9   20.04    9.74
   1  -2  10  524.67   49.98
  -1   2 -10  519.41   51.68
  -1  -2 -10  514.59   27.46
   1   2  10  564.87   47.85
  -1   2 -11   43.05   16.57
   1  -2  11   40.30   15.57
  -1   2 -12   24.73   13.70
   1  -2  12    5.97    8.67
  -1   2 -13   32.50   18.40
   1  -2  13   32.77   16.14
  -1   2 -14   72.89   24.98
   1  -2  14   57.36   23.36
   1  -2  15   16.80   15.88
  -1   2 -15   30.55   19.25
  -1  -2 -16  -23.10   27.47
  -1   2 -16   37.87   23.04
   1  -2  16   26.54   19.17
  -1  -3  16   -0.42    2.69
  -1  -3  15    6.65    7.47
  -1  -3  14   39.87   14.30
  -1   3  14   69.93   20.73
  -1   3  13   23.84   12.76
  -1  -3  13    3.47    4.12
  -1  -3  12  -10.59   12.90
  -1   3  12   17.54   11.03
  -1  -3  11   -5.54    8.10
  -1   3  11    6.70    7.68
  -1   3  10  183.71   25.79
   1  -3 -10  151.29    9.65
  -1  -3  10  176.91   28.59
   1  -3  -9   50.96    7.77
  -1  -3   9   62.91   17.42
  -1   3   9   57.98   13.41
   1  -3  -9   44.88    8.19
   1  -3  -8  357.36   29.21
   1  -3  -8  327.36   18.54
  -1   3   8  394.74   30.97
  -1  -3   8  371.28   39.20
   1  -3  -8  376.15   25.53
  -1  -3   7   87.49   18.77
   1  -3  -7   90.92   12.03
   1  -3  -7   92.73   13.38
  -1   3   7  102.95   14.32
  -1   3   6 1759.69   52.08
  -1  -3   6 1739.36   74.47
   1  -3  -6 1694.71   51.64
   1  -3  -6 1764.88   52.17
  -1  -3   6 1927.66   81.64
   1  -3  -5  754.94   33.37
  -1  -3   5  743.41   44.44
  -1   3   5  733.54   29.25
   1  -3  -5  766.27   29.60
  -1  -3   5  804.81   45.72
  -1   3   4 1885.50   35.20
  -1  -3   4 2011.06   67.25
   1  -3  -4 1976.84   37.36
  -1   3   4 1962.01   38.12
  -1  -3   4 1959.99   61.92
   1  -3  -4 1945.99   52.81
   1  -3  -3  426.78   23.67
  -1  -3   3  378.47   27.22
  -1   3   3  426.84   20.06
  -1   3   2 2481.70   57.84
  -1  -3   2 2388.12   61.61
  -1   3   2 2473.11   41.72
  -1   3   1    9.23    3.63
  -1  -3   1    9.68    3.56
  -1   3   0 3287.03   51.25
   1  -3   0 3290.82   48.60
  -1   3   0 3247.41   62.27
  -1   3  -1 1204.48   38.18
   1  -3   1 1215.01   36.78
  -1   3  -1 1194.56   38.54
   1  -3   2 4168.64   85.25
   1  -3   2 4261.78   79.78
  -1   3  -2 4270.36   84.22
   1   3   2 4225.69   65.11
   1   3   3 1074.57   38.84
   1  -3   3 1003.67   47.11
   1  -3   3  967.86   42.64
   1   3   4 1266.90   29.68
   1  -3   4 1330.89   61.49
   1  -3   4 1164.22   51.65
  -1  -3  -4 1247.33   29.14
  -1  -3  -4 1168.14   42.81
   1   3   4 1223.34   31.16
  -1  -3  -5  152.89   17.17
   1  -3   5  134.11   18.54
  -1  -3  -5  150.67   10.60
   1  -3   6   15.70    4.63
  -1  -3  -6   18.14    3.88
  -1  -3  -6   24.49    7.21
  -1  -3  -7   -1.92    2.70
   1  -3   7   -2.47    4.46
  -1  -3  -7   -2.29    3.82
   1  -3   8  788.33   54.46
  -1  -3  -8  742.60   34.31
  -1   3  -8  828.05   59.30
  -1   3  -9   81.57   21.47
  -1  -3  -9   51.15    8.55
   1  -3   9   46.48   14.01
   1  -3  10  159.67   28.37
  -1   3 -10  155.29   28.41
  -1  -3 -10  151.85   16.15
   1  -3  11   10.95    9.33
  -1   3 -11   20.60   14.71
  -1   3 -12   83.88   26.26
   1  -3  12   59.70   21.17
  -1   3 -13   34.33   20.52
   1  -3  13   13.93   12.61
   1  -3  14   36.29   18.74
  -1   3 -14   55.25   23.34
   1  -3  15   31.30   18.39
  -1  -4  15    0.09    7.95
  -1  -4  14    6.57    1.80
  -1  -4  13  -13.55   13.47
  -1  -4  12  115.47   25.40
  -1   4  12  128.79   23.40
  -1   4  11   13.69    9.58
  -1  -4  11   -1.13    7.92
  -1   4  10   52.79   13.16
  -1  -4  10   52.25   17.46
  -1  -4   9   17.03   11.68
  -1   4   9   23.51    8.96
   1  -4  -9   20.35    6.39
   1  -4  -8  769.98   41.06
   1  -4  -8  787.72   38.42
  -1   4   8  796.61   41.57
  -1  -4   8  792.22   58.42
  -1   4   7   93.44   12.84
  -1  -4   7   88.19   18.60
   1  -4  -7   81.17   11.49
   1  -4  -7   86.69   12.69
  -1   4   6  175.61   14.67
   1  -4  -6  182.86   17.89
   1  -4  -6  168.54   14.92
  -1  -4   6  181.99   24.66
   1  -4  -5   48.27    9.27
  -1  -4   5   43.90   11.77
   1  -4  -5   38.99    5.75
  -1  -4   5   40.07   10.96
  -1  -4   4 1226.43   56.84
  -1   4   4 1082.83   35.59
   1  -4  -4 1300.86   46.43
   1  -4  -4 1166.57   22.28
  -1   4   3   -1.29    4.38
  -1  -4   3    2.31    1.93
  -1   4   3    3.41    2.19
   1  -4  -3    3.22    2.71
  -1  -4   2 3254.52   77.47
  -1   4   2 3258.79   72.27
  -1  -4   1   10.01    4.22
   1  -4  -1   12.02    2.57
  -1   4   1    9.07    4.11
  -1   4   1    8.48    2.08
  -1   4   0 2479.29   49.95
   1  -4   0 2508.50   48.31
  -1   4   0 2444.30   61.18
  -1   4  -1  499.23   26.84
   1  -4   1  491.44   25.44
   1  -4   2 2199.08   61.41
  -1   4  -2 2200.88   63.88
   1   4   2 2222.10   51.97
   1   4   3   37.79    6.45
   1  -4   3   35.76    9.88
   1  -4   3   22.87    5.98
  -1   4  -3   29.31    8.08
   1   4   4   98.97   12.41
   1   4   4  101.00   11.29
   1  -4   4   90.18   14.21
   1   4   5  175.85   14.67
   1  -4   5  153.41   20.84
   1   4   5  152.76    8.78
  -1  -4  -5  180.10   17.73
  -1  -4  -6  589.08   35.49
   1  -4   6  584.59   44.15
   1  -4   7    8.18    1.33
  -1  -4  -7    9.69    4.56
   1  -4   8   -1.74    1.41
   1  -4   9   23.42    8.93
   1  -4  10  187.63   31.14
   1  -4  11   11.69    9.33
   1  -4  12   -0.61    4.28
   1  -4  13   10.12   12.42
   1  -4  14   33.98   20.06
   1  -4  15   26.04   18.36
  -1  -5  15   22.72    9.54
  -1  -5  14    6.52    2.70
  -1  -5  13    2.11    6.51
  -1  -5  12   -0.62    7.48
  -1  -5  11   -3.85   10.69
  -1  -5  10  525.83   54.71
  -1  -5   9   35.40   12.94
   1  -5  -9   36.17    9.15
   1  -5  -8    5.01    2.39
  -1  -5   8    9.06    5.76
  -1  -5   7    4.21    3.55
   1  -5  -7    2.12    0.34
   1  -5  -7    4.90    4.18
   1  -5  -6  677.95   25.45
  -1  -5   6  724.25   51.45
   1  -5  -6  750.83   39.70
  -1  -5   5    0.75    2.72
   1  -5  -5    3.31    1.42
  -1   5   4 1072.14   30.76
  -1  -5   4  994.92   53.02
  -1   5   4 1037.59   48.53
  -1  -5   3  139.30   18.65
   1   5  -3  171.49   20.94
  -1   5   3  153.71   12.93
  -1   5   3  164.62   17.65
  -1  -5   2  345.74   28.00
  -1   5   2  367.64   25.97
  -1   5   1  390.19   27.40
   1  -5  -1  406.10   17.15
  -1  -5   1  387.69   26.97
  -1   5   0 3509.87   81.91
   1  -5   0 3515.71   63.10
  -1  -5   0 3541.48   76.74
  -1   5   0 3476.75   67.67
  -1   5  -1    0.40    1.59
   1  -5   1    0.32    1.43
  -1   5  -2  339.66   26.95
   1  -5   2  347.45   25.63
  -1   5  -3  555.73   37.63
   1  -5   3  570.77   35.81
   1   5   3  577.85   27.41
   1   5   4 2854.02   60.21
   1  -5   4 2784.82   86.57
   1   5   4 2810.05   68.47
   1   5   5    3.22    2.63
   1   5   5    1.60    2.47
  -1  -5  -5    5.65    4.04
   1  -5   5   -4.96    6.01
   1   5   6   98.11   12.13
  -1  -5  -6   93.24   13.28
   1  -5   6   81.71   16.42
   1  -5   7   -1.84    4.73
  -1  -5  -7    0.38    1.90
   1  -5   8  642.60   53.22
   1  -5   9   60.22   15.81
   1  -5  10    0.35    4.68
   1  -5  11    7.99    7.78
   1  -5  12   73.63   21.39
   1  -5  13   13.17   10.45
   1  -5  14   16.46   15.52
  -1  -6  14   34.42   14.47
  -1  -6  13   -4.57   11.04
  -1  -6  12  132.40   27.30
  -1  -6  11   -8.57   12.70
  -1  -6  10   12.25   11.39
  -1  -6   9   25.72   12.75
  -1  -6   8   95.66   22.15
   1  -6  -8   99.63   11.78
   1  -6  -7    0.09    0.87
  -1  -6   7   -2.14    5.33
  -1  -6   6  134.75   23.59
  -1   6   5  150.80   14.18
  -1  -6   5  125.66   20.17
  -1   6   4 1124.96   34.63
  -1  -6   4 1049.76   58.62
  -1   6   4 1109.42   52.04
  -1  -6   3   -4.37    5.07
  -1   6   3   -0.82    2.62
  -1  -6   2  275.05   26.40
  -1   6   2  277.30   24.86
   1  -6  -2  258.39   11.31
  -1  -6   1   10.48    4.73
   1  -6  -1   11.47    2.79
  -1   6   1   13.60    5.76
  -1   6   0  849.39   34.22
  -1  -6   0  895.09   40.49
   1  -6   0  913.59   35.50
  -1   6   0  918.78   45.87
   1  -6   1   -3.28    3.22
  -1   6  -1   -0.45    1.65
  -1   6  -2   98.30   14.97
   1  -6   2   70.28   12.15
   1  -6   3   95.73   15.01
   1   6   3   94.53   12.29
   1   6   4    3.67    3.12
   1   6   4    2.53    3.19
   1  -6   4   -4.00    6.44
   1  -6   5   -1.25    5.05
   1   6   5    2.07    3.57
  -1  -6  -5    8.94    4.10
   1   6   5    7.04    4.01
  -1  -6  -6  784.84   38.92
   1  -6   6  804.64   54.66
   1   6   6  836.49   42.21
  -1  -6  -7    8.81    5.03
   1  -6   7    4.06    1.67
   1  -6   8   24.36    8.63
  -1  -6  -8   28.71    9.18
   1  -6   9  110.48   23.25
   1  -6  10   65.64   19.33
   1  -6  11    1.57    4.16
   1  -6  12   15.34    9.70
   1  -6  13   -0.23    4.74
   1  -6  14   34.61   18.24
  -1  -7  13   21.96   11.28
  -1  -7  12   -8.90   11.43
  -1  -7  11   -5.70   10.73
  -1  -7  10  273.84   41.98
  -1  -7   9   -0.34    2.75
  -1  -7   8   45.62   15.24
  -1  -7   7   17.71   10.15
  -1   7   6  877.08   32.83
  -1  -7   6 1096.32   69.94
  -1   7   5   -0.92    1.62
  -1  -7   5   -3.34    4.61
  -1  -7   4  221.60   27.77
  -1   7   4  224.16   25.02
  -1   7   4  221.56   17.22
  -1   7   3    3.57    3.67
  -1  -7   3    1.16    3.05
  -1   7   2  357.78   30.20
  -1  -7   2  343.94   31.07
   1  -7  -2  330.05   14.81
  -1  -7   1   69.38   13.10
   1  -7  -1   70.25    8.89
  -1   7   1   71.75   13.20
  -1   7   0 1122.44   54.80
  -1  -7   0 1151.62   50.64
  -1   7   0 1155.08   44.90
   1  -7   0 1118.21   42.72
  -1  -7  -1  180.62   18.84
   1  -7   1  167.67   18.29
  -1   7  -1  162.13   18.89
   1  -7   2  373.78   30.28
  -1   7  -2  382.70   32.08
   1  -7   3   -4.32    6.18
   1  -7   4  513.58   40.57
   1   7   4  509.73   29.67
   1   7   4  552.84   37.70
   1  -7   5   50.06   12.71
  -1  -7  -5   57.10    9.86
   1   7   5   64.55   10.21
   1   7   5   66.47   12.99
   1   7   6   13.03    5.27
   1   7   6    3.53    2.24
  -1  -7  -6   12.36    4.87
   1  -7   6    1.62    6.23
   1   7   7   -1.77    7.04
  -1  -7  -7    2.46    0.96
   1  -7   7   -4.64    7.38
   1  -7   8   50.57   14.72
   1  -7   9   -4.22    7.94
   1  -7  10   16.83    9.68
   1  -7  11   -0.92    2.69
   1  -7  12   55.14   19.91
   1  -7  13    2.86    9.53
  -1  -8  13   -8.13   14.27
  -1  -8  12   51.70   18.03
  -1  -8  11  -27.93   18.32
  -1  -8  10    1.95    8.83
  -1  -8   9   68.27   19.66
  -1  -8   8  104.71   24.69
  -1  -8   7   29.91   11.83
  -1   8   6   49.12   10.71
  -1  -8   6   19.55    9.04
  -1  -8   5  181.33   28.86
  -1   8   5  182.38   24.06
  -1   8   5  181.82   15.98
  -1  -8   4  846.10   58.87
  -1   8   4  865.67   53.34
  -1   8   3   44.28   11.73
  -1  -8   3   35.57   10.78
  -1   8   2    8.78    6.52
   1  -8  -2    6.40    2.13
  -1  -8   2    6.37    4.74
  -1   8   1   48.85   12.89
  -1  -8   1   51.80   12.07
   1  -8  -1   51.39    8.14
  -1  -8   0    0.02    3.15
   1  -8   0   -0.61    3.92
  -1   8   0   -0.59    1.71
  -1   8  -1    2.47    3.24
  -1  -8  -1    3.88    3.59
   1  -8   1    0.37    4.85
  -1   8  -1    4.43    4.04
   1  -8   2  211.55   23.33
  -1  -8  -2  229.17   21.32
   1  -8   3   -3.31    5.88
   1   8   4    5.44    3.20
   1  -8   4   -0.30    5.96
   1   8   4    5.37    3.59
   1   8   5    3.62    3.27
   1  -8   5   -6.42    8.02
   1   8   5    4.24    5.43
   1   8   6  599.16   44.28
   1  -8   6  537.73   48.04
   1   8   7   56.33   12.23
   1  -8   7   47.64   13.20
   1  -8   8   -5.77    8.66
   1  -8   9   -1.85    6.09
   1  -8  10   42.65   17.43
   1  -8  11    6.92    4.29
   1  -8  12   -7.47    7.78
   1  -8  13    7.07   11.01
  -1  -9  12  -14.78   16.78
  -1  -9  11    9.53    2.20
  -1  -9  10   69.83   23.53
  -1  -9   9    7.66    9.73
  -1  -9   8   -0.50    4.83
  -1  -9   7   19.40   10.65
  -1  -9   6   43.70   14.65
  -1   9   5    3.23    3.94
  -1   9   5   -5.01    6.60
  -1  -9   5   -1.18    2.14
  -1   9   4  152.80   24.46
  -1  -9   4  128.76   24.44
  -1  -9   3    2.36    5.00
  -1   9   3    3.31    4.75
   1  -9  -2  100.69    9.84
  -1   9   2  101.65   18.81
  -1  -9   2  101.39   18.69
  -1  -9   1   -1.15    4.98
  -1   9   1   -1.03    2.22
   1  -9  -1   -1.91    3.44
  -1   9   0  378.73   35.69
   1  -9   0  379.21   27.75
  -1  -9   0  384.84   33.22
  -1   9  -1   51.53   12.95
  -1  -9  -1   53.76   11.91
   1  -9   1   47.05   10.27
   1  -9   2  222.50   25.53
  -1  -9  -2  248.73   23.51
  -1  -9  -3    3.32    3.28
   1  -9   3   -3.22    5.84
   1   9   4  243.21   29.50
   1   9   4  217.23   23.09
   1  -9   4  218.80   28.76
  -1  -9  -4  254.35   22.18
   1   9   5   23.07    9.24
   1  -9   5   22.96    6.79
   1   9   6    5.46    5.42
   1  -9   6   -3.27    7.08
   1   9   7   -5.73    6.27
   1  -9   7   -8.81   10.21
   1  -9   8   27.96   10.86
   1  -9   9   -5.57    7.37
   1  -9  10   24.50   11.09
   1  -9  11    0.69    4.68
   1  -9  12   35.77   17.20
  -1 -10  11  -11.28   14.36
  -1 -10  10   -3.18    7.45
  -1 -10   9   13.05   11.03
  -1 -10   8  105.34   27.32
  -1 -10   7   22.39   11.88
  -1  10   6   29.57    9.34
  -1 -10   6   46.60   16.56
  -1  10   5  109.25   21.53
  -1  10   5  127.63   16.12
  -1 -10   5  120.77   25.35
  -1  10   4  286.76   34.86
  -1 -10   4  278.30   36.70
  -1 -10   3   63.55   16.48
  -1  10   3   63.87   16.00
  -1  10   2  125.42   22.31
   1 -10  -2  112.93   11.51
  -1 -10   2  119.74   21.44
  -1 -10   1   57.06   13.75
   1 -10  -1   53.25    9.06
  -1  10   1   52.43   14.01
  -1  10   0   81.35   17.47
   1 -10   0   78.08   12.97
  -1 -10   0   79.04   15.56
  -1  10  -1   -4.77    5.12
  -1 -10  -1   -3.02    4.37
   1 -10   1   -3.75    5.25
  -1  10  -2   55.92   14.61
   1 -10   2   52.73   11.50
  -1 -10  -2   61.48   11.91
   1  10   3   85.03   17.82
  -1 -10  -3   96.86   14.64
   1 -10   3   77.12   16.35
   1  10   4    2.23    2.27
   1 -10   4   -7.94    9.33
   1  10   5   -0.16    1.51
   1 -10   5   -5.60    8.25
   1  10   6  225.57   31.99
   1 -10   6  174.66   29.94
   1  10   7   20.13    8.29
   1 -10   7   13.98    7.48
   1 -10   8   -3.74    5.91
   1 -10   9    6.60    3.67
   1 -10  10   15.32   11.48
   1 -10  11    9.78    9.79
  -1 -11  11   -3.84   10.57
  -1 -11  10   15.07    3.42
  -1 -11   9    5.53   11.25
  -1 -11   8    0.68    6.64
  -1 -11   7    9.60   11.01
  -1 -11   6   50.98   17.98
  -1  11   6   37.31   12.39
  -1 -11   5   85.44   21.96
  -1  11   5   62.50   17.85
  -1  11   4   17.79    9.91
  -1 -11   4   14.85   10.33
  -1  11   3    4.88    6.68
  -1 -11   3   -2.38    3.96
  -1 -11   2   44.94   13.22
  -1  11   2   45.83   15.20
  -1  11   1   16.97   11.01
  -1 -11   1    9.13    5.31
  -1 -11   0  189.23   25.59
   1 -11   0  166.95   20.16
  -1  11   0  173.21   27.43
  -1  11  -1   15.43    8.02
  -1 -11  -1   14.57    6.80
   1 -11   1   12.52    3.83
   1 -11   2   75.45   15.56
  -1  11  -2   72.53   17.52
   1 -11   3   -5.43    6.46
  -1  11  -3   -1.45    1.47
   1  11   3   -0.89    4.84
   1  11   4   40.15   13.55
   1 -11   4   25.77    8.78
   1 -11   5   -5.07    6.81
   1  11   5   10.03    8.68
   1  11   6    0.20    4.36
   1 -11   6   -2.18    7.94
   1 -11   7    1.67    4.49
   1  11   7   -1.45    6.50
   1 -11   8    2.39    3.67
   1 -11   9   -9.98   10.96
   1 -11  10   -2.79    5.70
   1 -11  11    7.09    6.03
  -1  11 -11    7.97    8.25
  -1 -12  10   -8.73   12.34
  -1 -12   9  -21.32   17.84
  -1 -12   8   34.61   18.47
  -1 -12   7   14.03   10.67
  -1  12   6   31.12    9.49
  -1 -12   6   48.10   18.32
  -1  12   5   28.54   10.90
  -1 -12   5   30.28   14.71
  -1 -12   4   17.15    9.77
  -1  12   4   13.51    8.22
  -1  12   3    1.40    4.63
  -1 -12   3    0.22    4.14
  -1  12   2   62.36   17.85
  -1 -12   2   66.49   18.26
  -1  12   1    5.90    5.78
  -1 -12   1   -5.53    6.39
  -1  12   0   29.17   10.80
  -1  12  -1    4.16    6.73
  -1  12  -2  117.60   24.14
   1  12   2  120.60   25.04
   1 -12   2  113.35   19.90
  -1  12  -3   10.58    5.36
   1  12   3    8.34    8.25
   1 -12   3    5.95    3.49
  -1  12  -4   28.71   13.08
   1  12   4   27.42   11.87
   1 -12   4   19.57    7.03
  -1  12  -5    1.76    3.49
   1 -12   5   -2.57    4.27
  -1  12  -6   48.69   16.06
   1  12   6   57.55   19.35
   1 -12   6   45.57   15.23
   1 -12   7   10.18    6.25
   1  12   7   10.19    1.66
  -1  12  -7    4.98    5.31
  -1  12  -8    7.47    7.27
   1 -12   8    4.50    4.03
  -1  12  -9   -9.61   10.45
   1 -12   9    2.41    6.72
  -1  12 -10   60.57   19.63
   1 -12  10   52.31   20.63
  -1 -13   9  -13.13   15.49
  -1 -13   8  -23.40   18.89
  -1 -13   7    4.60    8.47
  -1  13   6   -3.96   11.81
  -1 -13   6   24.40   14.37
  -1  13   5    1.16    6.81
  -1 -13   5    4.14    7.07
  -1  13   4   -1.89    3.55
  -1 -13   4    7.30    7.44
  -1  13   3   17.77    9.57
  -1 -13   3   15.12    8.67
  -1  13   2    7.67    8.67
  -1  13   1    9.37    8.06
  -1  13   0   43.10   15.80
  -1  13  -1    6.05    9.11
   1  13   1    5.15    6.04
  -1  13  -2   -4.95    3.39
   1  13   2    2.88    3.68
   1  13   3    2.79    5.52
  -1  13  -3   -7.98    6.92
   1  13   4    5.43    7.11
  -1  13  -4    0.88    6.39
   1  13   5    0.37    5.47
   1 -13   5   -7.79    7.95
  -1  13  -5    3.46    5.74
   1 -13   6   -4.32    6.05
   1  13   6   -0.04    5.40
  -1  13  -6   -4.97    2.83
  -1  13  -7   -0.60    7.65
   1 -13   7   -1.41    8.86
  -1  13  -8    4.54    6.05
   1 -13   8    2.48    4.69
   1 -13   9    3.55    4.22
  -1 -14   8   31.54   14.12
  -1 -14   7  -13.44   13.67
  -1 -14   6    4.22    8.16
  -1  14   5  -12.21   13.39
  -1  14   4   12.08    5.19
  -1  14   3   -1.08    4.53
  -1  14   2   23.56   13.59
  -1  14   1    8.72   10.24
   1  14   0   17.44    8.20
  -1  14   0   25.24   12.78
  -1  14  -1    8.34   10.29
   1  14   1   -0.64    3.07
   1  14   2    9.79    9.58
  -1  14  -2    1.75    4.07
   1  14   3    8.19    8.73
  -1  14  -3    2.72    3.49
   1  14   4   15.98   13.79
  -1  14  -4    9.43    8.55
   1  14   5   10.83   10.90
   1  14   6   19.53   13.74
   1  15   1   11.96   11.61
   1  15   2   -4.17    6.24
   1  15   3   11.42   11.92
   1  15   4   20.33   12.08
   1  15   5    2.54    5.19
  -2   0  17   14.68   14.41
  -2   0  16   47.53   20.05
  -2   0  15    5.93    7.90
  -2   0  14   48.94   17.93
   2   0 -13    6.20    6.96
  -2   0  13   -6.14    9.65
  -2   0  12  101.62   22.78
   2   0 -12  133.71   22.78
   2   0 -11   -1.45    3.34
  -2   0  11   -6.81    9.84
   2   0 -10  542.86   40.67
  -2   0  10  580.08   50.22
  -2   0   9   -0.52    2.08
   2   0  -9   -5.42    5.00
   2   0  -8  154.09   18.28
  -2   0   8  160.91   23.22
   2   0  -8  164.96   20.35
   2   0  -7   -3.12    4.63
  -2   0   7    1.82    3.07
   2   0  -7    1.62    2.65
   2   0  -6 3305.08   86.32
   2   0  -6 3350.61   69.57
   2   0  -6 3253.03   86.19
  -2   0   6 3314.77   91.57
   2   0  -5   -0.14    1.19
   2   0  -5   -2.37    2.62
  -2   0   5   -1.64    2.92
   2   0  -4  178.66   17.02
  -2   0   4  145.24   15.78
   2   0  -4  163.54   10.08
   2   0  -3    1.60    2.21
  -2   0   3    2.03    3.35
  -2   0   3    1.89    2.47
  -2   0   2  344.39   25.10
  -2   0   1   -2.85    4.25
  -2   0   0   25.25    6.99
  -2   0  -1   19.24    7.56
  -2   0  -2 1832.46   52.41
  -2   0  -3   -0.19    1.64
   2   0   3    0.04    1.40
   2   0   3    1.11    1.92
  -2   0  -4  706.29   31.31
  -2   0  -5    1.40    3.56
  -2   0  -6  478.84   28.99
   2   0   6  513.05   39.09
  -2   0  -7   -0.36    1.89
   2   0   7    5.19    7.54
  -2   0  -8  144.12   17.97
   2   0   8  168.70   25.31
  -2   0  -9    3.23    4.57
   2   0   9   18.72   12.51
  -2   0 -10    7.94    6.26
   2   0  10   17.54   11.78
  -2   0 -11    5.29    5.77
   2   0  11   26.90   16.56
  -2   0 -12  303.41   28.95
  -2   0 -12  244.86   42.16
  -2   0 -13  -30.53   26.20
  -2   0 -14  -11.94   16.88
  -2   0 -15  -17.55   16.58
  -2   0 -16    6.94    6.72
  -2  -1  16   16.47   11.94
  -2   1  16   16.30   13.64
  -2  -1  15   -0.79    9.02
  -2   1  15    8.93    9.02
  -2   1  14   72.57   20.75
  -2  -1  14   54.90   17.70
   2  -1 -13   -7.92    9.02
  -2   1  13   -4.99    8.59
   2   1 -13   19.63   10.44
  -2  -1  13  -10.09   12.50
   2  -1 -12   57.98   12.44
  -2   1  12   56.14   16.58
   2   1 -12   64.52   16.11
  -2  -1  12   58.75   15.50
   2  -1 -11   10.52    6.78
   2   1 -11   31.72   11.88
  -2   1  11   17.47    4.78
  -2  -1  11   30.32   14.08
   2  -1 -10  195.09   24.37
   2   1 -10  231.38   25.19
  -2   1  10  221.51   29.36
  -2  -1  10  224.84   33.63
   2  -1  -9   12.13    6.03
   2   1  -9   21.95    9.42
  -2   1   9   18.81    9.01
  -2  -1   9   11.71    7.67
  -2  -1   8  482.36   42.47
  -2   1   8  489.54   40.39
   2   1  -8  490.65   31.68
   2  -1  -8  436.46   33.28
  -2   1   7   13.04    6.82
   2  -1  -7   12.41    5.74
   2   1  -7   11.32    5.62
   2  -1  -7   11.22    4.79
  -2  -1   7   10.02    4.53
  -2  -1   6   54.83   12.28
   2  -1  -6   69.63   11.19
  -2   1   6   58.52   11.63
   2   1  -6   56.20    9.41
   2  -1  -6   60.26   11.13
   2   1  -5  251.86   23.44
   2  -1  -5  218.43   20.87
  -2  -1   5  240.78   23.36
  -2   1   5  248.00   20.83
  -2  -1   4 5759.18  106.48
  -2   1   4 5708.95   91.35
   2   1  -4 5965.31  111.56
   2  -1  -4 5646.31   94.43
  -2  -1   3    7.28    2.57
  -2   1   3   11.24    5.14
  -2  -1   3    7.49    4.29
   2  -1  -3    1.37    3.61
  -2  -1   2  634.29   32.94
  -2   1   2  584.17   35.55
   2  -1  -2  567.72   37.40
  -2  -1   1  390.45   26.30
   2  -1  -1  384.21   16.14
  -2   1   1  376.05   30.38
  -2   1   0 6820.03   91.40
  -2   1   0 6795.98  105.10
  -2  -1   0 7029.12  114.50
  -2  -1  -1 1215.79   52.24
  -2   1  -1 1284.19   40.37
  -2   1  -2 2751.62   58.48
   2  -1   2 2655.88   51.40
   2   1   2 2682.93   76.05
  -2  -1  -2 2705.15   82.18
   2  -1   3 1041.90   30.13
   2   1   3 1109.82   40.68
  -2   1  -3 1083.45   39.18
  -2  -1  -3 1081.52   44.62
  -2   1  -4 1158.34   42.07
   2   1   4 1109.30   39.91
  -2   1  -4 1162.69   30.89
  -2  -1  -4 1079.89   49.80
   2  -1   4 1210.26   51.00
  -2  -1  -4 1154.05   43.92
  -2  -1  -5  132.14   18.49
  -2   1  -5  128.79   14.87
  -2   1  -5  137.12   10.13
   2  -1   5  141.87   19.39
  -2  -1  -5  122.51   13.24
  -2   1  -6  986.97   44.68
   2  -1   6  985.17   53.91
  -2   1  -6 1024.27   27.74
  -2  -1  -6  920.12   38.60
  -2   1  -7   19.65    6.45
  -2   1  -7    2.22   14.10
  -2  -1  -7   18.29    5.77
  -2   1  -7   24.43    4.23
   2  -1   7   28.57   11.26
  -2   1  -8  362.85   29.87
  -2   1  -8  294.58   39.28
  -2   1  -8  360.36   16.38
  -2  -1  -8  340.21   25.17
   2  -1   8  371.26   37.18
  -2   1  -9   10.69    4.59
   2  -1   9   13.82   10.62
  -2  -1  -9   11.39    5.04
  -2   1  -9    9.08    2.38
  -2   1 -10  362.76   31.92
  -2   1 -10  324.70   44.59
   2  -1  10  390.49   41.96
  -2  -1 -10  370.08   27.93
  -2   1 -11  -14.56   18.35
  -2   1 -11    3.49    4.46
  -2  -1 -11   -1.84    3.15
   2  -1  12   25.59   15.90
  -2   1 -12    3.88    4.89
   2  -1  13   19.62   16.85
  -2   1 -13    1.97    5.33
  -2   1 -14   -0.61    7.21
  -2  -1 -14  -49.57   34.28
  -2  -1 -15  -44.49   29.00
  -2   1 -15    1.74    6.15
  -2   1 -16   14.20   18.83
  -2  -1 -16  -22.94   22.28
  -2  -2  16   32.91   16.15
  -2   2  15    8.60   10.83
  -2  -2  15   -1.23    6.39
  -2   2  14   51.63   17.95
  -2  -2  14   31.93   11.69
  -2  -2  13   -3.54    9.59
  -2   2  13    2.89    1.83
   2  -2 -13  -17.77   15.76
  -2  -2  12   21.26    2.04
  -2   2  12   32.94   12.07
  -2   2  11   26.39    8.54
  -2  -2  11   31.46   14.91
  -2   2  10  836.02   56.62
  -2  -2  10  826.47   63.61
   2  -2  -9   90.32   14.08
  -2   2   9   74.40   14.63
  -2  -2   9   75.98   17.97
  -2   2   8  185.32   23.85
  -2  -2   8  147.51   24.60
   2  -2  -8  189.35   18.75
   2  -2  -7   82.46   11.91
  -2  -2   7   74.59   15.95
  -2   2   7   87.99   14.47
   2  -2  -7   82.93   13.38
   2  -2  -6 1719.90   55.40
  -2  -2   6 1581.20   69.13
  -2   2   6 1699.79   59.52
   2  -2  -6 1778.32   57.34
  -2  -2   5   18.85    6.65
  -2  -2   5   14.88    4.57
   2  -2  -5   15.89    6.32
  -2   2   5   16.75    4.83
  -2  -2   4   31.79    8.34
  -2   2   4   41.61    8.80
  -2  -2   4   38.19    7.76
   2  -2  -4   30.61    7.23
  -2   2   4   31.20    5.78
   2  -2  -3  342.61   25.04
  -2  -2   3  334.17   25.77
  -2   2   3  351.30   27.00
   2  -2  -2 3458.60   72.27
  -2   2   2 3233.73   87.22
  -2   2   1  726.62   32.98
  -2   2   0  984.43   34.84
   2  -2   0  990.08   34.29
  -2  -2   0 1018.47   41.89
  -2   2  -1  262.03   18.68
   2  -2   1  286.02   21.49
   2   2   1  293.61   23.50
  -2  -2  -1  288.82   22.69
  -2   2  -2 9206.94  114.99
   2  -2   2 9014.16  105.24
  -2   2  -2 9164.02  103.98
  -2  -2  -2 8728.15  128.55
   2   2   2 9100.45  161.10
   2  -2   2 8900.34  143.25
   2  -2   3  641.54   35.12
   2   2   3  585.28   35.83
  -2   2  -3  629.40   26.50
  -2  -2  -3  592.48   36.09
   2   2   4 1259.31   42.46
   2  -2   4 1299.92   54.50
  -2   2  -4 1182.21   36.14
  -2  -2  -4 1118.52   49.50
  -2  -2  -4 1239.10   56.13
   2  -2   5    8.14    7.31
  -2  -2  -5    1.34    1.51
  -2  -2  -5    4.44    4.49
  -2   2  -5    2.99    2.29
   2  -2   6 1034.87   56.92
  -2   2  -6 1065.35   35.66
  -2  -2  -6  955.21   44.40
  -2   2  -7   32.90    6.58
  -2  -2  -7   49.28   10.79
   2  -2   7   38.91   14.06
  -2   2  -7   20.22    7.82
  -2   2  -8  150.21   13.93
  -2   2  -8  114.83   24.02
   2  -2   8  133.74   22.94
  -2  -2  -8  149.99   18.33
  -2   2  -9   14.11    4.80
  -2   2  -9   26.57    6.10
   2  -2   9   31.94   14.71
  -2   2 -10   57.74   16.54
  -2   2 -10   87.22   10.35
   2  -2  10   87.00   22.54
  -2  -2 -10  111.47   17.16
  -2   2 -11   -6.97    7.44
  -2   2 -11    2.11    7.25
  -2   2 -12    9.58   10.29
   2  -2  12   15.64   12.37
  -2   2 -12   10.65    4.93
   2  -2  13   37.44   18.65
  -2   2 -13   11.86    6.58
  -2   2 -13   23.13   15.51
   2  -2  14   15.06   13.15
  -2   2 -14   13.71   15.07
  -2   2 -15   54.08   26.30
   2  -2  15   34.12   22.99
  -2   2 -16   54.57   27.57
  -2  -2 -16  -29.65   28.69
  -2  -3  16   -1.26    3.30
  -2  -3  15   -5.08    7.84
  -2   3  14   72.35   21.38
  -2  -3  14   39.60   11.57
  -2   3  13   24.27   13.41
  -2  -3  13    3.42    5.62
  -2  -3  12   84.30   24.58
  -2   3  12   90.83   20.06
  -2   3  11   85.24   18.33
  -2  -3  11   86.64   22.82
  -2   3  10  279.92   30.63
  -2  -3  10  273.22   37.92
  -2   3   9  117.12   18.27
  -2  -3   9  115.81   24.34
   2  -3  -9  117.75   16.31
   2  -3  -8 1092.24   49.99
  -2   3   8 1126.24   53.46
   2  -3  -8 1038.50   48.06
  -2  -3   8 1111.82   68.85
   2  -3  -7   37.67    8.49
   2  -3  -7   29.27    6.98
  -2   3   7   34.68    8.31
  -2  -3   7   26.94    8.37
  -2  -3   6  406.94   34.38
  -2   3   6  407.78   26.29
  -2  -3   6  372.16   34.36
   2  -3  -6  376.80   25.18
   2  -3  -5  303.27   19.69
  -2  -3   5  308.72   25.88
  -2   3   5  324.93   20.74
  -2  -3   5  283.88   28.54
  -2   3   5  308.94   20.00
  -2   3   4 3349.76   81.25
   2  -3  -4 3311.90   86.45
  -2  -3   4 3371.35   91.62
   2  -3  -4 3390.87   63.74
  -2   3   4 3445.50   56.26
   2  -3  -3   53.63    7.86
  -2   3   3   43.97    5.32
  -2  -3   3   48.63   10.33
   2  -3  -3   41.55    7.88
  -2   3   3   49.57   10.87
   2  -3  -2   69.60    9.43
  -2   3   2   98.90   12.07
  -2   3   1  215.35   16.92
  -2   3   0 1051.32   37.61
  -2   3   0 1044.57   40.78
  -2   3   0 1070.81   36.23
  -2   3  -1  227.46   19.60
   2   3   1  257.25   21.05
  -2   3  -1  231.71   18.72
  -2   3  -1  231.08   18.73
   2  -3   1  236.01   20.59
   2  -3   2   55.46   10.31
  -2   3  -2   50.48    8.69
   2  -3   2   59.60   11.36
  -2   3  -2   47.61    9.76
  -2  -3  -2   54.39    9.20
   2   3   2   54.50   10.06
   2   3   3   45.68   10.84
  -2   3  -3   43.52    7.84
   2  -3   3   44.95   10.74
   2  -3   3   47.89   10.58
  -2  -3  -3   50.92    9.21
  -2   3  -4  155.45   14.95
   2   3   4  149.48   18.05
   2  -3   4  137.93   18.67
  -2  -3  -4  147.20   16.12
   2   3   5   53.58    8.60
  -2  -3  -5   39.29    9.96
   2   3   5   51.90    5.83
  -2  -3  -5   45.16    8.53
  -2   3  -5   60.39    9.20
   2  -3   5   50.11   13.20
   2  -3   6  915.28   54.57
  -2   3  -6 1038.42   41.06
  -2  -3  -6  940.48   44.74
  -2   3  -7   15.98   10.59
   2  -3   7   14.51    9.11
  -2   3  -7   10.69    4.10
  -2  -3  -7    2.00    4.85
  -2   3  -8  175.21   17.73
   2  -3   8  145.33   25.34
  -2   3  -8  147.90   28.17
  -2  -3  -8  161.29   20.50
  -2  -3  -9   24.87    6.95
  -2   3  -9   32.58    7.77
  -2   3  -9   40.12   16.84
   2  -3   9   32.09   13.77
  -2   3 -10  452.41   29.29
   2  -3  10  390.46   45.86
  -2   3 -10  398.36   48.63
  -2  -3 -10  421.20   34.78
  -2   3 -11   31.61   18.11
   2  -3  11   26.19   15.04
  -2   3 -12   17.25   15.65
   2  -3  12   11.96   14.64
  -2   3 -13   -2.19    5.09
  -2   3 -13   31.00   21.58
   2  -3  13   18.74   16.20
   2  -3  14   33.41   18.32
  -2   3 -14   31.94   11.66
  -2   3 -15   36.93   23.43
   2  -3  15   22.75   17.20
  -2  -4  15   -8.01   12.59
  -2  -4  14   65.37   22.29
  -2  -4  13   -1.55   11.33
  -2  -4  12  231.09   40.12
  -2   4  12  250.82   32.23
  -2   4  11    5.04    6.96
  -2  -4  11    1.23    6.31
  -2   4  10  486.86   38.96
  -2  -4  10  470.55   51.89
   2  -4  -9    5.11    5.17
  -2   4   9    1.07    1.27
  -2  -4   9    0.94    2.26
  -2   4   8  314.55   25.52
   2  -4  -8  275.26   11.77
  -2  -4   8  315.98   36.51
   2  -4  -7  184.92   10.82
  -2   4   7  179.37   17.22
  -2  -4   7  197.50   27.40
  -2  -4   6  554.73   44.39
  -2   4   6  585.01   27.45
  -2  -4   6  640.26   43.94
   2  -4  -5  129.85   16.78
  -2   4   5  147.77   14.96
  -2   4   5  131.39   10.68
  -2  -4   5  121.20   19.31
   2  -4  -4  482.80   31.91
  -2   4   4  449.65   15.56
  -2  -4   4  469.60   36.88
  -2   4   4  465.33   33.51
  -2  -4   3   -0.98    1.79
   2  -4  -3    1.10    2.20
  -2   4   2 1285.36   41.70
  -2   4   2 1259.93   25.56
  -2  -4   2 1280.87   54.98
  -2   4   1    5.37    3.71
  -2   4   1   10.30    4.38
  -2   4   1    9.87    2.82
   2   4   0    4.31    2.89
  -2   4   0   -1.53    2.73
  -2   4   0    1.98    1.43
   2  -4   1   41.94    8.64
  -2   4  -1   41.88    8.55
   2   4   1   41.15    9.27
  -2   4  -1   36.72    7.98
   2   4   2 1211.44   47.32
   2  -4   2 1238.61   54.06
  -2   4  -2 1194.45   45.78
   2  -4   2 1233.22   48.04
  -2   4  -2 1205.26   50.64
   2  -4   3    5.47    4.69
  -2   4  -3    3.64    2.59
   2   4   3   -0.36    4.78
  -2   4  -3    1.44    1.98
  -2   4  -4  735.53   37.18
   2  -4   4  666.15   42.09
   2   4   4  709.61   46.46
   2   4   5    4.07    4.66
  -2  -4  -5   14.17    6.36
  -2  -4  -5   15.28    5.23
   2  -4   5   14.11    8.45
   2   4   6   42.31    7.41
   2  -4   6   47.99   13.53
  -2   4  -6   49.04    9.48
  -2  -4  -6   50.70    8.43
   2   4   6   48.49    6.76
  -2  -4  -7   68.61   10.72
   2  -4   7   74.32   17.61
  -2   4  -7   88.37   22.11
  -2   4  -7   70.10   12.27
  -2   4  -8  292.02   39.21
   2  -4   8  246.55   32.99
  -2   4  -8  273.66   25.34
  -2  -4  -8  230.64   20.65
  -2   4  -9   36.45    9.92
  -2   4  -9   63.75   22.02
  -2  -4  -9   25.83    7.35
   2  -4   9   31.72   13.98
  -2   4 -10    4.41    3.27
   2  -4  10    5.23    8.02
   2  -4  11  145.11   31.21
  -2   4 -11  146.94   32.51
   2  -4  12  103.22   26.59
  -2   4 -12  128.34   32.44
   2  -4  13   44.91   21.96
  -2   4 -14   -8.49    7.39
   2  -4  14   25.66   17.94
  -2  -5  15   -8.83   11.76
  -2  -5  14    5.25    8.18
  -2  -5  13   -8.21   14.06
  -2  -5  12  149.25   32.37
  -2   5  11   16.32    8.40
  -2  -5  11    9.21   10.35
  -2   5  10  111.61   17.12
  -2  -5  10  102.05   23.64
  -2   5   9   10.68    5.81
  -2  -5   9    8.15    5.52
  -2  -5   8  459.68   47.07
  -2   5   8  486.38   28.61
  -2  -5   7   -5.20    8.52
  -2   5   7    1.77    2.61
  -2  -5   6   92.94   18.39
  -2   5   6  106.38   11.45
  -2   5   5    3.37    1.85
  -2  -5   5    2.20    3.89
  -2   5   4 2614.88   69.51
  -2  -5   4 2594.51   92.62
  -2   5   3   10.67    3.91
  -2  -5   3   10.97    5.25
  -2   5   2   63.01    9.90
  -2   5   2   61.94   11.34
  -2   5   2   60.26    5.48
  -2  -5   2   62.36   12.24
  -2   5   1  145.15   15.97
  -2   5   1  160.15   17.69
  -2   5   1  158.89   12.53
  -2   5   0 1031.18   46.83
  -2   5   0 1054.12   39.17
   2  -5   0 1080.63   37.56
  -2   5  -1   56.62   10.95
   2  -5   1   54.34   10.13
   2   5   1   51.09   10.17
  -2   5  -1   49.26    9.88
   2   5   2 1109.44   47.27
  -2   5  -2 1147.17   51.95
   2  -5   2 1169.31   48.91
  -2   5  -2 1141.78   48.96
  -2   5  -3 1027.41   47.10
   2  -5   3 1019.13   49.31
   2   5   3 1089.80   46.56
  -2   5  -3 1044.53   54.32
  -2   5  -4 2055.54   68.17
   2  -5   4 1941.05   73.55
   2   5   4 1830.59   71.06
   2  -5   5    5.14    5.45
   2   5   5   -1.04    3.68
  -2   5  -5   -1.27    4.03
   2   5   6  265.17   18.35
   2   5   6  279.93   20.41
  -2   5  -6  268.27   26.09
   2  -5   6  254.80   30.25
   2  -5   7   14.96    8.82
   2  -5   8  152.67   27.06
  -2   5  -8  175.92   21.68
   2  -5   9   83.54   21.60
  -2   5  -9   99.45   17.74
   2  -5  10   27.14   14.49
  -2   5 -10   30.12    9.60
   2  -5  11   20.63   13.95
   2  -5  12   22.55   15.41
   2  -5  13   31.85   18.15
   2  -5  14   18.88   16.89
  -2  -6  14  -10.97   14.78
  -2  -6  13   17.79    2.28
  -2  -6  12  155.20   33.46
  -2  -6  11   19.13   11.09
  -2  -6  10  109.79   25.32
  -2  -6   9   -4.26    8.36
  -2  -6   8    4.31    3.41
  -2  -6   7   61.16   15.04
  -2   6   6  771.74   35.97
  -2  -6   6  786.60   58.02
  -2  -6   5   21.71    7.99
  -2   6   5   39.13   11.32
  -2   6   4   32.57    6.33
  -2  -6   4   32.21    9.90
  -2  -6   3    7.43    3.99
  -2   6   3    8.75    4.51
  -2   6   3   -2.52    6.60
  -2   6   2 2206.95   33.86
  -2   6   2 2321.66   62.41
  -2  -6   2 2145.52   76.12
  -2   6   2 2356.31   78.09
  -2   6   1  209.38   23.01
  -2   6   1  202.88   15.06
  -2  -6   1  212.30   24.02
   2  -6   0   27.43    6.89
  -2   6   0   20.77    7.28
  -2   6   0   19.55    6.28
   2   6   1  354.23   29.33
   2  -6   1  398.66   27.48
  -2   6  -1  367.86   30.17
  -2   6  -1  356.55   28.00
   2  -6   2  527.29   34.16
  -2   6  -2  540.46   36.12
  -2   6  -2  480.32   35.48
   2   6   2  497.21   33.45
  -2   6  -3  209.40   23.34
   2   6   3  214.81   21.82
   2  -6   3  198.58   22.81
  -2   6  -4  121.22   18.17
   2  -6   4  109.17   17.71
   2   6   4  117.00   16.33
   2  -6   5   32.20   10.26
  -2   6  -5   30.68    9.43
   2   6   5   40.11   10.89
   2   6   6  128.06   16.55
  -2   6  -6  129.70   19.29
   2   6   6  102.93   13.41
   2  -6   6  126.97   21.56
   2   6   7    9.91    2.06
   2  -6   7   14.28    9.17
   2  -6   8  259.87   35.76
  -2   6  -8  325.99   32.43
   2  -6   9   45.12   15.98
  -2   6  -9   52.00   13.47
  -2   6 -10   19.07    8.79
   2  -6  10   20.92   11.39
   2  -6  11   30.70   16.32
  -2   6 -11    9.38    5.09
   2  -6  12   91.50   26.77
   2  -6  13   25.58   15.97
  -2  -7  13   -9.07   16.47
  -2  -7  12   72.88   24.05
  -2  -7  11   12.00   11.73
  -2  -7  10   22.25   11.90
  -2  -7   9   37.39   15.07
  -2  -7   8  329.50   42.71
  -2  -7   7    5.71    4.05
  -2  -7   6  333.87   39.28
  -2   7   6  324.86   29.41
  -2  -7   5   17.76    7.53
  -2   7   5   62.07   14.34
  -2   7   4  244.93   20.35
  -2  -7   4  217.54   29.30
  -2  -7   3   -3.09    4.96
  -2   7   3   -5.25    6.97
  -2   7   3    1.53    3.38
  -2   7   2  203.81   20.60
  -2  -7   2  214.85   25.58
  -2   7   2  215.63   24.97
  -2   7   1   54.39    8.70
  -2   7   1   61.15   12.91
  -2  -7   1   51.51   12.34
  -2   7   0  595.54   40.63
   2  -7   0  609.39   32.80
  -2   7   0  616.34   34.89
  -2   7  -1   20.20    5.48
   2  -7   1   29.19    8.19
  -2   7  -1   20.92    7.81
   2  -7   2  214.67   22.73
  -2   7  -2  217.71   25.13
   2   7   2  210.00   23.48
  -2   7  -2  207.33   24.83
  -2   7  -3   21.09    8.51
   2   7   3   18.19    6.86
   2  -7   3   22.13    8.93
   2   7   4  559.62   35.78
  -2   7  -4  603.09   42.50
   2  -7   4  506.70   40.68
  -2   7  -5   24.25    8.46
   2  -7   5   21.72    8.83
   2   7   5   16.07    3.38
  -2   7  -6  163.44   23.37
   2   7   6  161.40   20.62
   2  -7   6  135.92   23.61
   2   7   6  130.19   18.89
   2   7   7    9.89    3.57
  -2   7  -7    3.25    2.77
   2  -7   7    9.73    6.18
  -2   7  -8    0.22    5.06
   2  -7   8    6.88    6.61
  -2   7  -9    0.92    4.18
   2  -7   9    3.49    5.65
   2  -7  10   26.13   14.28
  -2   7 -10   41.41   14.19
  -2   7 -11    6.85    6.05
   2  -7  11    6.98    9.67
   2  -7  12   12.60   12.96
   2  -7  13   17.16   14.60
  -2  -8  13  -21.02   18.58
  -2  -8  12   35.80   19.50
  -2  -8  11   13.36   12.07
  -2  -8  10   89.21   24.85
  -2  -8   9    1.65    4.28
  -2  -8   8   -2.87    4.88
  -2  -8   7   -4.47    4.52
  -2  -8   6  288.56   37.48
  -2   8   6  291.70   29.00
  -2   8   5   12.88    2.78
  -2  -8   5   25.84   11.42
  -2  -8   4   -1.86    4.03
  -2   8   4   -5.46    8.56
  -2   8   4    1.66    2.84
  -2  -8   3   28.72    9.81
  -2   8   3   30.16    8.58
  -2   8   3   28.50    9.05
  -2   8   2  929.09   56.19
  -2  -8   2  977.28   59.84
  -2  -8   1    5.04    5.65
  -2   8   1    3.78    5.22
  -2  -8   0   53.53   12.22
  -2   8   0   48.14   12.65
  -2   8   0   54.11   10.67
   2  -8   0   48.14   10.32
  -2   8  -1   18.63    6.71
  -2   8  -1   20.77    7.96
   2  -8   1   25.84    8.51
  -2   8  -2  266.88   29.69
   2  -8   2  250.00   25.39
  -2   8  -3   42.35   13.41
   2  -8   3   39.60   11.15
  -2   8  -4  199.60   26.83
   2  -8   4  183.34   25.06
   2   8   4  187.27   21.96
  -2   8  -5   19.60    8.53
   2   8   5   19.15    6.98
   2   8   5   19.70    8.63
   2  -8   5   15.73    7.28
   2   8   6   80.47   16.45
   2  -8   6   63.64   16.95
  -2   8  -6   78.25   16.93
  -2   8  -7   14.88    4.83
   2   8   7   21.61    7.38
   2  -8   7   25.22   12.15
  -2   8  -8  253.20   33.07
   2   8   8  232.60   27.70
   2  -8   8  184.61   33.10
  -2   8  -9    3.66    6.14
   2  -8   9   10.33    9.23
   2  -8  10   26.39   14.46
  -2   8 -10   41.17   14.41
  -2   8 -11    2.30    1.63
   2  -8  11    5.51    7.61
   2  -8  12   16.29   12.50
  -2  -9  12   15.93   14.19
  -2  -9  11   39.18   17.90
  -2  -9  10   15.38   12.04
  -2  -9   9    0.71    3.78
  -2  -9   8  112.32   26.84
  -2  -9   7    2.16    1.92
  -2  -9   6   -2.65    6.96
  -2   9   6   31.98   13.04
  -2  -9   5   16.73    6.32
  -2   9   5   24.47    6.50
  -2   9   4  331.97   26.90
  -2   9   4  323.99   35.42
  -2  -9   4  320.32   38.57
  -2  -9   3   73.38   16.42
  -2   9   3   67.87   12.17
  -2   9   3   60.36   15.28
  -2   9   2  202.31   27.35
  -2  -9   2  192.57   27.10
  -2  -9   1   -2.56    4.17
  -2   9   1    5.78    5.25
  -2   9   0  459.12   33.03
  -2  -9   0  466.92   39.22
  -2   9   0  439.85   39.63
   2  -9   0  456.17   30.49
  -2   9  -1   -0.81    1.31
  -2  -9  -1    4.20    4.65
  -2   9  -1    1.51    2.04
   2  -9   1    2.83    3.96
  -2   9  -2  106.52   19.86
   2  -9   2   99.32   16.90
  -2  -9  -2  116.69   18.56
  -2   9  -3   19.74    8.80
   2  -9   3   25.76   10.00
  -2   9  -4  628.15   50.08
   2  -9   4  609.08   48.07
  -2   9  -5    9.89    5.75
   2   9   5    7.83    5.89
   2  -9   5    3.95    5.27
   2  -9   6   10.56    8.25
   2   9   6   10.54    8.53
  -2   9  -6    3.56    4.46
  -2   9  -7   -0.68    2.73
   2  -9   7   -0.07    1.18
  -2   9  -8   29.85   12.13
   2  -9   8   30.60   13.79
  -2   9  -9    2.38    6.49
   2  -9   9    6.48    7.66
  -2   9 -10   30.66   13.30
   2  -9  10   24.36   13.72
   2  -9  11    9.03   10.07
  -2   9 -11    4.07    5.84
   2  -9  12   22.38   15.38
  -2 -10  11    5.90    6.55
  -2 -10  10   38.94   17.47
  -2 -10   9    6.15    7.77
  -2 -10   8   10.97    7.78
  -2 -10   7   11.44    8.63
  -2 -10   6  159.22   31.21
  -2 -10   5    5.38    4.93
  -2  10   5   12.71    5.82
  -2  10   4   31.20    9.52
  -2  10   4   18.78    7.96
  -2 -10   4   28.43   10.21
  -2  10   3   93.86   16.19
  -2  10   3  114.68   21.94
  -2 -10   3  119.75   23.06
  -2  10   2  293.41   35.18
  -2 -10   2  293.96   35.83
  -2 -10   1   24.24   10.28
  -2  10   1   27.91   10.67
  -2 -10   0   16.66    7.21
  -2  10   0   26.55   11.50
   2 -10   0   22.67    8.25
  -2  10  -1   98.78   20.52
   2 -10   1   97.39   16.41
  -2 -10  -1   99.84   18.25
  -2 -10  -2    7.78    5.69
  -2  10  -2    6.99    5.92
   2 -10   2    3.52    3.74
  -2  10  -3    3.52    5.51
  -2 -10  -3    3.85    4.51
   2 -10   3    1.73    2.59
  -2  10  -4  126.90   23.79
   2 -10   4  122.21   22.33
   2  10   5    1.01    4.94
   2 -10   5    1.90    4.22
  -2  10  -5   -4.70    6.43
   2 -10   6   13.23    7.97
   2  10   6   18.30    8.57
  -2  10  -6   15.60    7.30
   2  10   7    8.18    9.80
   2 -10   7   -0.52    3.40
  -2  10  -7   -3.02    5.87
   2 -10   8   62.99   19.59
  -2  10  -8   75.44   20.01
  -2  10  -9   14.31    8.95
   2 -10   9   14.36   11.20
  -2  10 -10    0.66    1.91
   2 -10  10    0.03    4.34
   2 -10  11    7.75   11.40
  -2  10 -11   -4.81    2.84
  -2 -11  10   33.42   17.04
  -2 -11   9   12.08    9.96
  -2 -11   8   32.24   16.26
  -2 -11   7   -0.72    1.64
  -2 -11   6   20.87   12.14
  -2 -11   5   34.56   12.72
  -2 -11   4   14.45    8.71
  -2  11   4   21.61    8.56
  -2  11   4   -1.36   10.39
  -2  11   3   -2.43    4.74
  -2  11   3   -6.50    7.36
  -2 -11   3    2.51    2.52
  -2  11   2    1.71    5.77
  -2 -11   2   -1.69    2.43
  -2  11   1   26.29   10.61
  -2 -11   1   18.66    8.28
  -2 -11   0   58.41   14.88
  -2  11   0   49.05   14.91
  -2 -11  -1    5.31    1.87
  -2  11  -1    4.51    3.29
   2 -11   1    8.04    5.23
  -2 -11  -2   51.89   12.76
   2 -11   2   56.97   14.10
  -2  11  -2   69.89   18.19
  -2  11  -3   11.50    8.86
   2 -11   3   11.82    7.33
  -2  11  -4   40.49   14.33
   2  11   4   39.12   13.20
   2 -11   4   42.64   14.00
   2  11   5    6.38    8.92
  -2  11  -5    9.93    3.18
   2 -11   5    3.77    4.80
   2  11   6   22.74   11.28
  -2  11  -6   29.67   12.67
   2 -11   6   23.87   13.10
   2  11   7   10.52   10.77
  -2  11  -7   -3.18    3.67
   2 -11   7    0.13    4.98
  -2  11  -8    2.10    4.34
   2 -11   8    5.89    8.16
  -2  11  -9    3.97    6.57
   2 -11   9   10.78   11.89
  -2  11 -10   10.60    7.75
   2 -11  10   12.82   11.59
  -2  11 -11   19.58   12.24
  -2 -12   9    5.39   12.22
  -2 -12   8    3.73    7.06
  -2 -12   7    6.17    5.45
  -2 -12   6  103.44   26.85
  -2 -12   5   -1.69    3.17
  -2 -12   4   15.45    4.33
  -2  12   4    7.43    2.77
  -2 -12   3   38.36   14.53
  -2  12   3   23.75   11.03
  -2  12   3   28.68    9.63
  -2  12   2  176.11   29.86
  -2 -12   2  168.91   29.24
  -2  12   1    5.10    6.36
  -2 -12   1   -2.90    4.33
  -2 -12   0   -5.82    7.05
  -2  12   0    8.50    7.37
  -2  12  -1   -1.26    5.71
  -2  12  -2   37.84   14.58
  -2  12  -3   16.70   10.60
   2 -12   3    5.78    5.24
  -2  12  -4    4.85    6.14
   2  12   4   -0.08    2.71
   2 -12   4    5.84    7.01
   2  12   5   16.58   11.55
  -2  12  -5   10.28    7.37
   2 -12   5   16.93   10.01
   2  12   6   25.75   14.61
  -2  12  -6   13.46   12.26
   2 -12   6   12.47   11.57
  -2  12  -7   10.53    7.71
   2 -12   7   24.35   13.67
   2 -12   8   19.40   13.33
  -2  12  -8   12.08   11.49
  -2  12  -9   15.55   11.11
   2 -12   9   21.71   14.71
  -2  12 -10    6.22    6.54
   2 -12  10   21.26   14.52
  -2 -13   8   19.50   14.05
  -2 -13   7    4.05    4.90
  -2 -13   6    0.99    4.03
  -2 -13   5   20.87   12.87
  -2  13   4   -6.49   11.66
  -2 -13   4   -0.73    4.58
  -2 -13   3    1.41    4.50
  -2  13   3   -4.14    6.72
  -2  13   2   -6.13    7.33
  -2 -13   2   -0.69    5.08
  -2  13   2   -5.24    2.91
  -2  13   1    1.70    5.25
  -2  13   0   63.45   18.93
  -2  13  -1    7.42   10.12
  -2  13  -2   23.84   12.99
  -2  13  -3   13.43   11.29
   2  13   3    1.14    2.73
  -2  13  -4    6.56    7.80
   2  13   4    0.47    5.66
   2  13   5   16.62   10.35
  -2  13  -5   15.54   10.43
   2 -13   6   33.73   15.69
   2  13   6   36.54   20.08
  -2  13  -6   28.66   14.94
  -2  13  -7   14.76    7.16
   2 -13   7   11.43   11.87
   2 -13   8    9.80   11.28
   2 -13   9   14.46   14.39
  -2 -14   7    7.46    9.04
  -2 -14   6   32.05   16.86
  -2 -14   5    1.31    3.27
  -2  14   4  -11.37   11.34
  -2  14   3  -13.04   12.28
  -2  14   2   -2.51    4.62
  -2  14   1    2.84    5.54
  -2  14   0   17.71   11.76
  -2  14  -1   17.72   12.24
  -2  14  -2   22.24   13.16
   2  14   2   23.44   13.71
  -2  14  -3    6.42    9.45
   2  14   3    2.79    6.07
  -2  14  -4    7.91    9.20
   2  14   4    9.39   11.27
   2  14   5   23.76   15.68
   2  15   1   -2.86   10.40
   2  15   2    9.08    8.53
   2  15   3   11.51   10.78
   2  15   4   13.07   12.37
   2  15   5   14.52   15.98
  -3   0  16    4.16   10.61
  -3   0  15   -4.24    8.58
  -3   0  14  193.58   35.59
  -3   0  13  -17.32   15.28
  -3   0  12    7.03    7.99
   3   0 -11    5.15    6.40
  -3   0  11   -3.71    2.96
   3   0 -10  792.85   41.00
  -3   0  10  834.65   63.30
  -3   0   9   -2.12    5.16
   3   0  -9    5.01    4.05
   3   0  -8  438.37   25.01
  -3   0   8  440.49   40.35
  -3   0   7   -2.64    5.65
   3   0  -7   -1.94    1.72
   3   0  -7    3.48    2.95
  -3   0   6 4280.99  111.20
   3   0  -6 4445.00  105.80
  -3   0   5    0.81    2.72
   3   0  -5    4.13    4.17
  -3   0   4  152.04   20.35
   3   0  -4  140.08   18.43
  -3   0   3    3.34    4.96
   3   0  -3   -0.95    2.48
  -3   0   2 1421.25   63.25
  -3   0   1   -4.18    7.38
  -3   0   0 3790.86  118.52
  -3   0  -1   -5.16    5.26
  -3   0  -2  542.79   37.56
   3   0   3    1.58    3.93
  -3   0  -3   15.69   10.46
  -3   0  -4 1996.07   64.94
   3   0   4 1975.35   45.04
   3   0   4 1931.54   68.22
  -3   0  -5   -4.04    5.21
  -3   0  -6  110.18   15.19
  -3   0  -7    0.60    2.19
  -3   0  -8  266.42   25.85
  -3   0  -9    3.45    2.96
  -3   0 -10    5.91    5.25
  -3   0 -11    0.50    1.15
  -3   0 -12   31.58    3.36
  -3   0 -12   77.45   15.25
  -3   0 -13  -27.41   22.81
  -3   0 -14  -15.42   20.11
  -3   0 -15  -14.47   18.10
  -3  -1  16   54.50   20.16
  -3   1  15    3.56    3.70
  -3  -1  15  -12.30   13.32
  -3   1  14   11.84    4.68
  -3  -1  14    8.96    6.19
  -3  -1  13    3.84    6.60
  -3   1  13   -2.58    6.89
  -3   1  12  326.24   41.02
  -3  -1  12  323.14   44.39
   3  -1 -11   10.54    4.43
  -3   1  11   11.80    7.94
  -3  -1  11    9.08    8.01
   3  -1 -10   69.35   12.39
  -3   1  10   79.03   18.32
  -3  -1  10   71.39   19.23
  -3   1   9   15.44    9.09
  -3  -1   9   14.84    6.91
   3  -1  -9   12.46    2.79
   3  -1  -8 1080.15   44.07
  -3   1   8 1119.00   60.88
  -3  -1   8 1089.88   64.62
   3  -1  -8 1039.59   54.37
  -3  -1   7   -1.30    4.55
  -3   1   7    2.64    2.13
   3  -1  -7    1.77    3.47
  -3   1   6  607.81   38.94
  -3  -1   6  599.77   43.31
   3  -1  -6  628.44   39.22
  -3   1   5   15.24    7.99
  -3   1   5   15.86    5.38
  -3  -1   5   13.20    5.36
   3   1  -5   16.55    6.57
   3  -1  -5   12.96    4.13
  -3   1   4  181.72   22.11
  -3  -1   4  157.10   19.73
   3   1  -4  160.11   20.74
   3  -1  -4  160.68   21.49
  -3  -1   4  155.06   11.37
  -3  -1   3  454.52   35.49
  -3   1   3  425.05   34.79
   3  -1  -3  450.74   38.90
  -3  -1   2 3951.07  103.98
  -3   1   2 3674.67  113.18
   3  -1  -2 3850.20  115.35
  -3   1   1  157.86   14.10
  -3  -1   1  171.58   22.34
  -3   1   1  178.48   24.24
  -3   1   0  373.03   27.78
  -3  -1   0  343.92   32.28
  -3   1   0  360.81   32.48
  -3   1  -1  258.81   26.76
  -3  -1  -1  308.37   31.18
  -3   1  -1  294.76   27.24
  -3   1  -2  820.65   40.86
  -3  -1  -2  899.51   57.40
   3   1   2  814.87   52.74
  -3   1  -3    8.95    2.75
  -3  -1  -3    3.58    4.43
   3   1   3   -3.62    6.41
   3  -1   3    4.61    2.00
   3   1   4  140.79   18.04
   3  -1   4  123.81   12.29
  -3  -1  -4  140.80   19.40
  -3   1  -4  124.07   15.96
  -3   1  -5  125.22   16.76
   3   1   5  128.48   17.25
   3   1   5  119.72    8.25
  -3  -1  -5  139.33   19.47
  -3   1  -6  124.77   16.79
  -3  -1  -6  134.32   20.21
  -3   1  -7   78.80   13.81
  -3  -1  -7   88.17   17.40
  -3   1  -8  194.01   23.09
  -3   1  -8  162.55   29.16
  -3  -1  -8  230.43   25.17
  -3  -1  -9   43.02   13.54
  -3   1  -9   17.51    7.67
  -3  -1 -10  246.53   26.95
  -3   1 -10  202.17   25.73
  -3   1 -10  163.60   29.55
  -3  -1 -11   41.05   14.75
  -3   1 -11   14.85    7.85
  -3   1 -12   94.73   18.20
  -3   1 -12   79.86   21.87
  -3   1 -13   -3.97   10.05
  -3  -1 -14  -38.81   30.48
  -3   1 -14    5.74    7.25
  -3   1 -15   13.01   12.41
  -3  -1 -15  -10.74   19.88
  -3  -2  16  -13.95   14.72
  -3  -2  15  -12.85   14.06
  -3  -2  14   93.69   25.86
  -3   2  14  104.35   23.89
  -3   2  13   -6.32    8.72
  -3  -2  13    1.44    3.91
  -3   2  12   27.59    9.25
  -3  -2  12   40.27   17.14
  -3   2  11   16.13    6.44
  -3  -2  11   26.05   12.06
  -3   2  10  693.43   53.71
  -3  -2  10  617.48   58.51
  -3  -2   9   24.73    9.79
   3  -2  -9   26.36    8.41
  -3   2   9   35.72   11.27
  -3  -2   8  506.92   45.82
  -3   2   8  529.08   40.78
   3  -2  -8  573.24   40.73
  -3  -2   7   13.73    3.89
  -3   2   7   10.98    4.81
   3  -2  -7   10.42    3.29
  -3   2   6  992.71   47.32
  -3  -2   6 1020.49   59.00
   3  -2  -6 1120.01   60.37
  -3   2   5  205.40   21.86
  -3  -2   5  183.55   17.34
  -3   2   5  172.90   17.90
  -3  -2   5  166.39   22.10
   3  -2  -5  168.35   24.26
  -3  -2   4 1971.82   74.04
  -3   2   4 1955.81   74.20
   3  -2  -4 1934.21   77.98
  -3   2   3  268.65   29.60
   3  -2  -3  229.74   28.18
   3  -2  -2 1133.56   55.61
   3  -2  -2 1121.45   32.31
  -3  -2   2 1032.72   57.85
  -3   2   2 1188.75   65.87
  -3  -2   1  207.03   23.96
   3  -2  -1  199.31   15.79
  -3   2   1  202.37   23.47
   3  -2   0 3323.06   75.70
  -3  -2   0 3397.72   97.18
  -3   2   0 3272.51   84.83
   3   2   1   16.53    8.76
  -3   2  -1    4.31    3.32
  -3   2  -1   15.32    7.09
  -3  -2  -1   22.76    7.79
   3  -2   1    4.52    3.29
  -3   2  -2  402.76   27.42
   3  -2   2  396.45   26.55
  -3  -2  -2  390.49   34.07
   3   2   2  490.71   43.00
  -3   2  -3  385.35   27.82
   3  -2   3  403.32   25.63
  -3  -2  -3  431.03   37.41
   3   2   3  418.91   37.43
  -3   2  -4 3701.90   90.04
   3   2   4 3615.87   96.73
   3   2   5   64.75   12.25
  -3   2  -5   65.61   12.61
  -3  -2  -5   73.28   14.70
  -3   2  -6   24.08    8.92
  -3  -2  -6   17.24    6.04
  -3   2  -7   14.92    7.64
  -3   2  -7    5.29    7.22
  -3  -2  -7   12.75    5.99
  -3   2  -8  145.55   21.64
   3  -2   8  162.34   27.92
  -3   2  -8  137.92   26.17
  -3  -2  -8  145.19   20.35
  -3  -2  -9   22.18    8.81
  -3   2  -9   -9.74   11.32
   3  -2   9   29.99   15.32
  -3   2  -9    9.25    6.86
  -3  -2 -10   17.19    8.42
  -3   2 -10   -3.58   10.68
  -3   2 -10   26.35   10.88
  -3   2 -11   39.34   13.23
  -3   2 -11   17.89   10.67
  -3   2 -12    4.44    5.55
  -3   2 -12   -3.76    7.31
  -3   2 -13   23.20   10.37
  -3   2 -13   26.17   16.69
  -3   2 -14   23.87   18.78
  -3  -2 -15  -53.11   35.66
  -3   2 -15   35.65   24.59
  -3  -3  15  -14.15   15.07
  -3  -3  14  -12.65   10.05
  -3   3  13   41.29   14.10
  -3  -3  13   46.35   19.49
  -3   3  12  146.98   25.68
  -3  -3  12  147.26   31.14
  -3   3  11    0.47    5.78
  -3  -3  11    2.39    2.97
  -3  -3  10   11.14    6.28
  -3   3  10   -5.19    7.38
   3  -3  -9   36.41   10.42
  -3  -3   9   39.40   12.76
  -3   3   9   46.06   13.23
  -3  -3   8  342.95   38.91
  -3   3   8  365.81   32.27
   3  -3  -8  328.24   32.92
  -3  -3   7   61.31   13.81
  -3  -3   7   63.89   14.92
  -3   3   7   65.81   12.05
   3  -3  -7   56.76   12.70
  -3  -3   6  889.92   48.41
  -3   3   6  962.48   46.37
  -3   3   6  928.04   42.21
  -3  -3   6  911.09   58.85
   3  -3  -6  876.29   48.79
  -3   3   5   15.32    4.94
  -3  -3   5    9.81    5.73
  -3   3   5   19.37    7.62
   3  -3  -5   21.61    9.23
   3  -3  -4 1278.22   54.17
  -3  -3   4 1242.99   61.01
  -3   3   4 1206.94   62.83
  -3   3   3    0.67    4.30
   3  -3  -3    1.60    3.04
   3  -3  -2 3533.96   84.95
  -3   3   2 3421.52   94.72
  -3   3   1   17.20   10.32
   3  -3  -1    3.18    3.77
   3  -3   0  284.36   22.61
   3   3   0  271.85   26.00
  -3   3   0  262.92   22.61
  -3  -3   0  295.33   28.29
   3  -3   1    2.17    0.80
  -3  -3  -1    3.92    3.51
   3  -3   1    1.01    1.43
  -3   3  -1   -0.27    2.63
   3   3   1    1.76    1.56
  -3   3  -1    5.03    3.79
  -3   3  -2  656.18   36.44
   3  -3   2  695.33   43.11
   3  -3   2  640.92   35.81
  -3   3  -2  632.40   41.36
  -3  -3  -2  704.90   43.48
   3   3   2  780.34   53.13
  -3   3  -3  591.51   36.56
  -3   3  -3  649.34   34.02
  -3   3  -3  585.84   41.79
  -3  -3  -3  654.02   41.31
   3   3   3  729.23   53.86
  -3   3  -4  472.37   33.26
  -3   3  -4  475.21   29.22
  -3  -3  -4  474.59   36.01
   3   3   4  430.39   37.64
  -3   3  -5   14.08    3.68
   3   3   5   10.24    4.59
  -3  -3  -5    5.90    3.29
  -3   3  -5   15.45    7.09
   3   3   6  595.03   35.75
  -3   3  -6  637.17   43.37
   3  -3   6  599.72   46.11
  -3   3  -6  646.02   33.59
   3   3   6  540.90   16.65
  -3  -3  -6  659.27   45.88
  -3   3  -7   67.29   14.84
  -3   3  -7   76.17   11.25
  -3   3  -7   77.51   20.62
   3  -3   7   82.16   19.56
  -3  -3  -7   79.17   15.02
  -3  -3  -8   35.21    9.64
  -3   3  -8   31.62    9.76
  -3   3  -8   33.54    7.45
  -3   3  -8   36.78   16.03
   3  -3   8   43.62   15.57
  -3  -3  -9   -0.08    3.60
  -3   3  -9   13.79   11.85
  -3   3  -9    2.53    2.62
  -3   3  -9    6.16    6.48
   3  -3   9   13.45   12.95
  -3   3 -10  241.29   31.63
  -3   3 -10  257.53   43.46
   3  -3  10  264.74   38.08
  -3  -3 -10  287.53   34.92
  -3   3 -11   75.31   24.11
  -3   3 -11   62.53   16.43
   3  -3  11   92.39   26.29
  -3   3 -12   32.20   19.19
  -3   3 -12   42.88   13.87
   3  -3  12   49.77   21.76
  -3   3 -13   34.19   21.42
  -3   3 -13   27.39   11.82
  -3   3 -14   79.09   31.97
  -3   3 -15   49.43   27.24
  -3  -4  15   -9.27   13.32
  -3  -4  14  121.46   31.57
  -3  -4  13   14.71   12.52
  -3   4  12   11.68    6.88
  -3  -4  12    8.50   10.12
  -3   4  11  107.26   19.20
  -3  -4  11  123.18   28.68
  -3   4  10  360.35   33.65
  -3  -4  10  333.28   43.72
  -3   4   9  129.34   18.38
  -3  -4   9  112.41   24.22
   3  -4  -8  265.60   20.67
  -3   4   8  261.51   24.96
  -3  -4   8  246.56   33.14
   3  -4  -7  164.45   17.11
  -3  -4   7  160.60   26.11
  -3  -4   7  167.68   25.39
  -3   4   7  173.43   18.28
   3  -4  -6  257.52   20.96
  -3  -4   6  240.54   26.97
  -3   4   6  271.15   20.74
  -3  -4   6  247.59   31.74
  -3   4   6  286.36   26.46
  -3   4   5    4.26    0.94
  -3  -4   5    3.33    3.35
   3  -4  -5   11.51    4.54
  -3   4   5    2.64    5.21
   3  -4  -4  572.70   32.47
  -3  -4   4  549.84   41.71
  -3   4   4  553.86   24.07
  -3   4   4  606.09   47.19
   3  -4  -3   20.55    6.48
  -3   4   3   30.76   11.46
  -3   4   2   42.97   12.93
  -3   4   1   77.15   12.40
  -3   4   1   75.51   11.25
  -3   4   0 1829.27   59.24
   3  -4   0 1910.13   62.51
  -3   4   0 1825.04   59.10
   3   4   0 1950.40   71.62
   3  -4   1    4.73    4.40
  -3   4  -1   -4.01    5.55
  -3   4  -1   11.17    5.77
   3   4   1    5.18    4.45
  -3   4  -1    5.81    3.25
  -3   4  -2  112.70   16.17
  -3   4  -2  113.94   14.72
  -3   4  -2  107.16   16.72
  -3  -4  -2  122.55   18.17
   3   4   2  126.38   19.52
  -3   4  -3  136.66   18.10
  -3   4  -3  133.16   16.41
  -3  -4  -3  147.91   18.87
   3   4   3  187.41   27.22
  -3   4  -4 2935.33   91.29
  -3   4  -4 2948.77   79.01
   3  -4   4 2916.07   91.89
  -3  -4  -4 3077.29   86.40
   3   4   5  296.13   28.87
  -3   4  -5  358.70   27.65
   3  -4   5  339.26   33.06
  -3  -4  -5  373.02   30.80
   3   4   6   24.30    7.46
  -3   4  -6   22.53    6.97
  -3  -4  -6   28.18    8.86
  -3   4  -6   39.78   17.22
   3  -4   6   29.81   12.42
  -3   4  -7   15.92   15.43
  -3  -4  -7    6.06    5.57
   3  -4   7   10.54   10.17
  -3   4  -7    5.17    3.95
  -3   4  -8  223.51   22.47
  -3   4  -8  247.07   39.37
   3  -4   8  207.45   32.07
  -3  -4  -8  232.20   25.61
  -3   4  -9   50.47   20.77
  -3   4  -9   22.30    7.07
  -3  -4  -9   21.64    8.58
   3  -4   9   34.56   13.56
  -3   4  -9   18.76    6.70
  -3   4 -10   51.39   10.82
   3  -4  10   48.58   19.27
  -3   4 -10   70.84   25.72
  -3   4 -10   37.97   13.28
  -3   4 -11  105.20   21.65
  -3   4 -11  107.35   30.97
   3  -4  11  106.86   26.30
  -3   4 -12    6.20    5.12
   3  -4  12   24.11   15.63
  -3   4 -13    6.75    7.66
  -3   4 -13   46.60   24.37
   3  -4  13   21.91   16.66
  -3   4 -14   74.03   32.27
  -3   4 -14   14.48   11.60
  -3  -5  14    8.17   12.40
  -3  -5  13   81.04   26.80
  -3  -5  12  150.65   32.36
  -3  -5  11   22.36   12.91
  -3  -5  10  106.92   24.88
  -3   5  10  112.96   17.43
  -3  -5   9   84.83   21.31
  -3   5   9   92.05   14.21
  -3   5   8  282.29   21.95
  -3  -5   8  281.59   37.99
  -3  -5   7    3.82    1.94
  -3   5   7    2.40    1.06
  -3  -5   6  761.07   58.01
  -3   5   6  794.84   29.05
  -3   5   6  764.06   45.05
  -3   5   5   19.02    2.45
  -3  -5   5   24.75    9.64
  -3   5   5   19.40    4.06
  -3  -5   4 1341.38   68.08
  -3   5   4 1344.72   30.33
  -3   5   4 1451.03   66.88
  -3  -5   3   93.93   17.31
  -3   5   3   91.92    8.89
  -3   5   3  125.78   19.99
  -3   5   2 1409.34   54.16
  -3   5   2 1392.54   39.30
  -3   5   1   80.05   13.26
  -3   5   1   77.97   10.53
  -3   5   0   41.56    9.71
  -3   5   0   41.96    8.44
  -3   5   0   41.98    8.27
   3   5   1  275.15   27.76
  -3   5  -1  257.93   24.75
  -3   5  -1  251.76   24.57
  -3   5  -1  246.64   24.05
  -3   5  -2 1435.18   60.92
  -3   5  -2 1426.97   58.59
  -3   5  -2 1384.28   62.38
   3   5   2 1485.36   64.14
  -3   5  -3  132.32   17.59
   3  -5   3  116.86   19.87
   3   5   3  136.50   20.55
  -3   5  -4  390.97   31.10
   3  -5   4  384.11   34.35
   3   5   4  487.93   44.41
   3   5   5   27.34   10.03
  -3   5  -5   29.75    9.38
   3  -5   5   37.61   12.98
   3   5   6  257.33   24.95
  -3  -5  -6  317.43   26.73
  -3   5  -6  325.07   28.32
   3  -5   6  287.32   34.24
   3   5   7   46.30   10.28
   3   5   7   48.85    7.75
  -3   5  -7   45.92   11.24
  -3  -5  -7   51.28   10.55
   3  -5   7   56.95   16.96
  -3   5  -8   14.16    6.44
  -3  -5  -8   11.80    4.70
   3  -5   8   19.52   13.04
  -3   5  -9    0.53    2.53
   3  -5   9   10.01   11.85
  -3   5 -10   56.23   13.05
   3  -5  10   52.73   20.09
   3  -5  11   37.53   17.43
  -3   5 -11   10.86    5.78
   3  -5  12   47.48   20.92
  -3   5 -12    1.48    4.36
  -3   5 -13   10.89    7.45
   3  -5  13   40.50   19.47
  -3   5 -14    5.64    5.29
  -3  -6  14   19.99   15.72
  -3  -6  13   21.40   16.21
  -3  -6  12    2.24    8.77
  -3  -6  11   35.55   16.67
  -3  -6  10  173.57   34.07
  -3  -6   9   38.37   13.44
  -3  -6   8  174.19   30.32
  -3   6   7   31.00    9.60
  -3  -6   7   16.60    7.12
  -3  -6   6  199.28   29.72
  -3   6   6  190.76   23.91
  -3  -6   5   11.36    6.22
  -3   6   5   10.51    4.74
  -3  -6   4  771.10   55.54
  -3   6   4  827.05   48.51
  -3   6   3  259.24   24.36
  -3  -6   3  291.22   31.62
  -3   6   2  346.46   27.51
  -3   6   2  337.68   18.83
  -3   6   1   98.93   15.48
  -3   6   1   97.42   16.32
  -3   6   1  105.14   12.29
  -3   6   0 1226.06   54.05
  -3   6   0 1261.25   59.72
  -3   6   0 1223.78   49.09
  -3   6  -1    0.57    1.99
  -3   6  -1   -1.80    3.68
  -3   6  -1    1.89    0.89
  -3   6  -2   -2.14    1.23
   3   6   2    5.13    5.11
   3  -6   2    7.49    6.66
  -3   6  -3    1.88    0.92
   3   6   3    2.76    3.11
  -3   6  -4  309.94   29.93
   3  -6   4  310.87   32.03
   3   6   4  349.49   36.41
  -3   6  -5    4.71    4.55
   3   6   5    4.10    1.16
   3  -6   5   11.32    9.80
   3  -6   6  233.44   31.39
  -3   6  -6  227.03   26.64
   3   6   6  180.36   24.62
   3   6   7   24.56    7.23
  -3   6  -7   19.43    8.74
   3  -6   7   38.20   15.83
   3  -6   8   96.82   23.40
  -3   6  -8   96.94   17.86
  -3   6  -9   -1.30    2.72
   3  -6   9   17.69   15.34
  -3   6 -10   49.93   13.51
   3  -6  10   43.40   19.23
   3  -6  11   29.49   17.94
  -3   6 -12   24.19    9.24
   3  -6  12   39.52   18.84
  -3   6 -13   -9.01    7.94
   3  -6  13   26.08   17.52
  -3   6 -14   -8.93    9.10
  -3  -7  13   16.82   13.97
  -3  -7  12  244.88   44.70
  -3  -7  11    2.55    4.06
  -3  -7  10   52.44   17.59
  -3  -7   9   16.76    8.09
  -3  -7   8  564.59   58.17
  -3  -7   7   17.58    9.39
  -3   7   7   21.53    7.94
  -3  -7   6   10.90    6.42
  -3   7   6    6.10    4.31
  -3  -7   5    3.63    2.96
  -3   7   5   16.56   10.84
  -3   7   4  408.05   33.28
  -3  -7   4  345.72   38.49
  -3  -7   3   21.71    8.78
  -3   7   3   21.99    7.51
  -3   7   2  349.45   28.62
  -3   7   2  363.20   35.56
  -3   7   2  345.87   19.20
  -3  -7   2  385.80   37.96
  -3   7   1   80.39   14.00
  -3   7   1   75.28   14.99
  -3   7   1   76.22   11.19
  -3   7   0   14.59    5.96
  -3   7   0   11.67    6.01
  -3   7   0    6.74    3.47
  -3   7  -1  120.80   19.23
  -3   7  -1  121.07   17.80
  -3   7  -2  320.14   32.02
   3  -7   2  318.43   29.45
  -3   7  -3   85.80   16.06
   3  -7   3   81.71   16.55
   3  -7   4   30.27   11.94
  -3   7  -4   11.09    6.98
   3   7   4   12.78    4.90
   3   7   5   57.82   16.44
   3  -7   5   65.24   17.79
  -3   7  -5   51.32   13.57
   3  -7   6  517.91   47.73
  -3   7  -6  570.10   44.43
   3   7   6  544.03   47.38
  -3   7  -7   14.06    7.21
   3   7   7   20.72    8.08
   3  -7   7   31.16   13.99
  -3   7  -8   -1.47    3.50
   3  -7   8   13.23   11.10
  -3   7  -9    5.79    5.95
   3  -7   9   15.55   11.67
  -3   7 -10   20.55    9.60
   3  -7  10   33.32   18.88
   3  -7  11   13.35   11.98
   3  -7  12   14.82   12.22
  -3   7 -13  -13.58   11.53
  -3  -8  12   14.15   14.16
  -3  -8  11    5.30   10.11
  -3  -8  10  184.78   37.27
  -3  -8   9    2.57    7.53
  -3  -8   8    9.69    8.50
  -3  -8   7    8.88    6.91
  -3   8   6   15.65    4.32
  -3  -8   6   17.40    7.82
  -3  -8   5    3.96    1.80
  -3   8   5   24.99   12.95
  -3   8   4  444.29   33.89
  -3  -8   4  451.36   47.26
  -3  -8   3   21.89    9.13
  -3   8   3   27.35    8.67
  -3   8   2  213.88   23.81
  -3   8   2  226.91   28.25
  -3   8   2  198.48   13.72
  -3  -8   2  223.07   29.10
  -3   8   1   54.48   12.53
  -3   8   1   64.72   13.45
  -3   8   1   70.73   10.88
  -3  -8   1   75.83   17.70
  -3   8   0  356.41   32.02
  -3   8   0  351.25   34.59
  -3   8   0  323.11   27.64
  -3   8  -1   35.04   10.18
  -3   8  -1   38.28   11.09
   3  -8   2   83.34   16.16
  -3   8  -2   95.78   18.56
  -3   8  -3    8.31    6.39
   3  -8   3   11.75    7.80
  -3   8  -4    5.19    5.75
   3  -8   4   10.99    8.69
  -3   8  -5  175.43   25.58
   3  -8   5  162.41   27.06
  -3   8  -6  112.46   21.76
   3   8   6  132.54   22.09
   3  -8   6  134.24   25.42
  -3   8  -7   -0.36    3.93
   3   8   7    6.30    6.37
   3  -8   7   14.32   11.48
   3  -8   8   50.90   17.89
  -3   8  -8   44.74   14.94
  -3   8  -9    8.36    6.19
   3  -8   9   16.49   14.90
  -3   8 -10   36.08   13.17
   3  -8  10   38.95   19.10
   3  -8  11   13.96   13.48
   3  -8  12    6.28   11.19
  -3  -9  12   27.55   16.65
  -3  -9  11    1.37    2.65
  -3  -9  10   40.05   18.39
  -3  -9   9    9.90    9.35
  -3  -9   8  183.92   34.83
  -3  -9   7   41.85   14.42
  -3  -9   6   79.52   21.42
  -3   9   6   82.75   19.15
  -3  -9   5  -12.36   10.75
  -3   9   5   34.92   16.36
  -3   9   4  383.73   32.23
  -3  -9   4  357.16   43.54
  -3  -9   3    2.24    4.94
  -3   9   3    8.31    6.30
  -3   9   2  160.97   22.27
  -3   9   2  169.10   25.98
  -3  -9   2  164.90   27.41
  -3   9   1   21.14    6.15
  -3  -9   1   27.20   11.90
  -3   9   1   12.47    1.65
  -3   9   1   16.91    7.61
  -3   9   0    0.90    2.78
  -3  -9   0    5.01    6.03
  -3   9   0    0.26    3.01
  -3   9   0   -6.03    7.36
  -3   9  -1   95.75   19.64
  -3   9  -2  316.85   35.90
   3  -9   2  318.24   31.14
   3  -9   3   71.53   15.99
  -3   9  -3   61.57   15.12
  -3   9  -4   10.54    6.18
   3  -9   4    9.86    8.62
  -3   9  -5    5.51    5.24
   3  -9   5   10.54    9.55
   3   9   6  111.83   22.45
   3  -9   6  119.63   24.69
  -3   9  -6  102.46   21.70
  -3   9  -7   -1.95    2.28
   3   9   7    8.03    7.22
  -3   9  -8   10.36    9.14
   3  -9   8   15.37   11.87
  -3   9  -9    6.06    6.27
   3  -9   9   18.70   15.79
  -3   9 -10   12.51    9.26
   3  -9  10   22.15   13.77
   3  -9  11   20.31   18.00
  -3 -10  11    4.17   10.08
  -3 -10  10   21.90   13.76
  -3 -10   9   -1.76    2.26
  -3 -10   8   27.15   13.89
  -3 -10   7    7.12    8.40
  -3 -10   6   30.55   12.91
  -3 -10   5   12.57    7.01
  -3  10   5   28.31   11.21
  -3  10   4  136.49   20.31
  -3 -10   4  141.97   27.48
  -3  10   3  147.72   21.28
  -3  10   3  167.18   27.31
  -3 -10   3  149.55   27.93
  -3 -10   2   20.63   10.37
  -3  10   2   10.37    4.74
  -3  10   2   21.01    8.87
  -3 -10   1    8.51    6.19
  -3  10   1    9.61    6.30
  -3  10   1    7.92    4.32
  -3  10   0  195.19   25.54
  -3  10   0  196.67   29.36
  -3 -10   0  199.06   28.63
  -3 -10  -1    5.66    6.92
  -3  10  -1    2.56    3.11
  -3  10  -2   36.08   13.24
   3 -10   2   42.43   11.95
  -3  10  -3   11.90    8.42
   3 -10   3   15.70   10.48
   3 -10   4   49.40   16.51
  -3  10  -4   43.97   15.16
  -3  10  -5   21.96   11.05
   3 -10   5   36.29   15.59
  -3  10  -6    7.52    7.39
   3  10   6    9.55    7.05
   3 -10   6   16.50   12.48
  -3  10  -7    2.69    7.00
   3 -10   7    7.89   10.25
  -3  10  -8   71.14   19.66
   3 -10   8   60.93   22.13
  -3  10  -9   12.46    8.94
   3 -10   9   26.70   16.55
  -3  10 -10    8.95    7.80
   3 -10  10   31.31   18.17
   3 -10  11   16.11   13.55
  -3 -11  10    8.06   11.39
  -3 -11   9   10.01   10.14
  -3 -11   8   28.48   15.90
  -3 -11   7   21.93   11.48
  -3 -11   6    5.90    6.38
  -3 -11   5   10.92    7.12
  -3 -11   4   -2.44    4.54
  -3  11   4    9.69    5.83
  -3 -11   3    4.36    2.66
  -3  11   3   15.38    7.84
  -3  11   3   -0.95   10.46
  -3 -11   2   -3.04    7.07
  -3  11   2   -9.60   10.53
  -3  11   2    4.36    3.84
  -3 -11   1    6.88    6.04
  -3  11   1    6.38    5.27
  -3  11   1   -1.35    4.28
  -3  11   0   17.03    9.56
  -3 -11   0   31.42   11.19
  -3  11   0   34.30   13.48
  -3 -11  -1   15.38    7.88
  -3  11  -1   20.71   11.03
  -3  11  -2  210.42   31.92
  -3 -11  -2  213.74   30.03
   3 -11   2  218.40   27.18
  -3 -11  -3   17.51    9.75
  -3  11  -3   18.18   11.31
   3 -11   3   16.71    9.56
  -3  11  -4   13.30   11.17
   3 -11   4   16.75   10.23
  -3  11  -5   16.70    9.05
   3  11   5   22.23   11.81
   3 -11   5   25.69   13.98
  -3  11  -6   57.59   19.24
   3  11   6   62.84   17.87
   3 -11   6   74.58   21.03
  -3  11  -7    5.71    9.26
   3 -11   7   19.40   13.55
  -3  11  -8   10.12    8.11
   3 -11   8   21.04   16.11
  -3  11  -9    9.09    9.78
   3 -11   9   22.83   16.99
  -3  11 -10    7.92   11.74
   3 -11  10   17.98   16.40
  -3 -12   9   -1.22    6.90
  -3 -12   8   15.15   13.49
  -3 -12   7    2.57    4.04
  -3 -12   6   53.40   20.81
  -3 -12   5   -1.88    3.33
  -3 -12   4  141.86   30.06
  -3 -12   3   59.04   19.10
  -3  12   3   55.46   14.59
  -3  12   3   39.47   12.16
  -3  12   2   96.27   18.95
  -3  12   2  101.72   21.79
  -3 -12   2  108.87   24.01
  -3 -12   1    6.86    3.74
  -3  12   1    4.03    3.89
  -3  12   1   -1.61    2.51
  -3 -12   0   38.13   13.14
  -3  12   0   43.12   14.52
  -3  12   0   36.30   11.92
  -3 -12  -1    5.66    7.13
  -3  12  -1    3.86    5.70
  -3  12  -2   16.43   12.18
  -3  12  -3   12.72   11.41
  -3  12  -4    9.78   10.92
   3 -12   4   18.44   10.36
   3  12   5   -0.94    5.57
  -3  12  -5    6.85    6.94
   3 -12   5   16.05   12.41
  -3  12  -6   19.39   11.94
   3  12   6   12.68   11.77
   3 -12   6   21.92   13.99
   3 -12   7   33.78   16.58
  -3  12  -7   16.25   12.64
  -3  12  -8   11.62   10.32
   3 -12   8   40.17   19.68
   3 -12   9   33.62   17.36
  -3  12  -9   19.96   12.91
  -3  12 -10   -2.15    6.55
  -3 -13   8   -1.33    5.94
  -3 -13   7    5.43    7.78
  -3 -13   6   21.16   14.00
  -3 -13   5   13.46    7.91
  -3 -13   4    3.74    2.16
  -3 -13   3    5.89    5.32
  -3  13   3   -9.69   12.92
  -3 -13   2   11.59    8.84
  -3  13   2   -1.64    7.12
  -3  13   2   12.94    7.85
  -3  13   1    1.32    2.61
  -3  13   1    1.14    3.95
  -3  13   0    1.20    4.33
  -3  13   0    6.64    3.77
  -3  13  -1   -7.09    9.19
  -3  13  -1   15.87    9.64
  -3  13  -2   32.27   14.44
  -3  13  -3    8.30    7.75
  -3  13  -4   13.35    8.85
   3  13   4    5.97    4.45
  -3  13  -5   15.45   11.63
   3  13   5   -0.22    3.64
  -3  13  -6   24.13   13.40
  -3  13  -7    5.56    5.20
   3 -13   8   11.98   12.79
  -3 -14   7    9.17    9.70
  -3 -14   6   21.42   13.48
  -3 -14   5    0.41    6.32
  -3 -14   4    3.39    2.79
  -3  14   3  -11.09   11.35
  -3  14   2   -8.52    7.78
  -3  14   1    4.23    4.26
  -3  14   1   -5.70    9.63
  -3  14   0   16.17    8.13
  -3  14   0   15.18    7.20
  -3  14  -1    2.91    5.57
  -3  14  -1   -2.25    6.39
  -3  14  -2   13.05   10.14
   3  14   3  -11.10   10.93
   3  14   4   22.40   13.26
   3  14   5   -0.58    7.41
  -3  15   0   26.22   11.78
  -3  15  -1   -9.58    8.68
  -3  15  -2   -6.58    7.69
   3  15   2   -2.49   10.19
   3  15   3   -6.89   10.21
   3  15   4    0.90    3.86
  -4   0  16   -0.47   10.20
  -4   0  15  -16.38   15.92
  -4   0  14   96.63   26.63
  -4   0  13    5.82    8.25
  -4   0  12  218.04   36.49
  -4   0  11   -3.29    7.06
  -4   0  10   -1.32    3.97
  -4   0   9   -7.85    8.23
  -4   0   8 1420.93   76.18
  -4   0   7   -3.94    4.99
  -4   0   6  303.02   30.33
  -4   0   5    5.63    6.95
  -4   0   4 3092.44  109.53
   4   0  -3    3.60    2.59
  -4   0   3    5.47    8.25
  -4   0   2  292.54   33.80
  -4   0   1    0.69    1.74
  -4   0   0 2266.87  103.47
  -4   0  -1   -5.74    7.20
  -4   0  -2 4275.92  131.08
  -4   0  -3   12.99    9.32
  -4   0  -4 1134.83   59.52
   4   0   5   -0.59    1.75
  -4   0  -5   34.19   13.62
  -4   0  -6 1703.01   71.57
  -4   0  -7   26.72   14.53
  -4   0  -8  351.53   34.11
  -4   0  -9   26.48   12.83
  -4   0 -10   43.79   15.71
  -4   0 -11  -14.40   20.61
  -4   0 -11   42.95   16.26
  -4   0 -12  -10.18   18.79
  -4   0 -12   50.91   16.50
  -4   0 -13  -10.44   13.10
  -4   0 -14  -13.37   17.31
  -4  -1  16   22.36    6.78
  -4   1  15   -4.71    7.34
  -4  -1  15  -18.15   16.92
  -4  -1  14  113.63   30.63
  -4   1  14   83.58   22.02
  -4   1  13   12.79   10.97
  -4  -1  13   -1.95    3.35
  -4   1  12   37.28   16.45
  -4  -1  12   34.11   16.49
  -4   1  11   43.95   16.00
  -4  -1  11   35.07   13.25
   4  -1 -10  144.35   14.08
  -4   1  10  150.29   26.79
  -4  -1  10  143.12   26.36
  -4   1   9   -0.96    2.18
  -4  -1   9   -5.98    8.13
   4  -1  -9    3.61    2.77
  -4   1   8   27.13    9.16
  -4  -1   8   35.67   12.74
   4  -1  -8   25.17    4.57
  -4  -1   7   60.91   15.37
  -4   1   7   65.31   14.64
  -4   1   6  925.17   51.27
  -4  -1   6  909.08   54.88
  -4  -1   5  253.48   29.56
   4  -1  -5  274.00   33.19
  -4   1   5  289.42   32.01
  -4  -1   4  894.05   57.34
  -4   1   4  877.73   58.80
   4  -1  -4  856.52   60.42
  -4  -1   3   30.56   12.22
   4  -1  -3   25.10    9.84
  -4   1   3   29.83   10.17
  -4  -1   2 1554.89   78.59
  -4   1   2 1664.04   85.87
   4  -1  -2 1643.56   83.51
  -4   1   1  567.58   34.00
  -4  -1   1  603.49   47.38
  -4   1   0  864.85   50.58
  -4  -1   0  869.19   59.17
  -4   1   0  896.55   61.68
  -4   1  -1   49.13   11.30
  -4  -1  -1   66.06   17.28
  -4   1  -1   48.44   13.80
  -4  -1  -2  523.93   47.26
  -4   1  -2  448.96   37.27
   4   1   2  513.46   47.23
  -4  -1  -3   -1.41    5.16
   4   1   3  -10.64    9.47
   4  -1   3   -5.69    8.33
  -4   1  -4  294.06   28.35
   4  -1   4  258.37   22.29
  -4  -1  -4  267.35   32.03
  -4   1  -5   -2.06    5.41
  -4  -1  -5    5.94    7.26
   4  -1   5    8.74    5.10
  -4   1  -6    0.60    4.62
   4   1   6    9.95    3.33
  -4   1  -7   24.41    3.42
  -4   1  -7   27.50    8.57
  -4  -1  -7   41.96   13.02
  -4   1  -8  156.81   21.51
  -4   1  -8  132.43   28.53
  -4  -1  -8  160.63   24.20
  -4  -1  -9   13.87    9.88
  -4   1  -9   -0.27    4.18
  -4   1 -10  -12.65   18.30
  -4   1 -10   -5.19    5.78
  -4  -1 -10    8.16    7.17
  -4   1 -11   -5.84    6.38
  -4   1 -11   -6.29   14.51
  -4  -1 -11   15.45    9.35
  -4   1 -12   86.19   17.62
  -4   1 -12   65.25   20.76
  -4   1 -13  -13.37   14.42
  -4   1 -14    2.30    8.72
  -4  -1 -14    0.37   12.23
  -4  -2  16   13.00    3.15
  -4  -2  15  -13.51    7.25
  -4   2  14   46.08   17.49
  -4  -2  14   61.03   23.32
  -4   2  13   -8.59   12.16
  -4  -2  13    9.79   12.20
  -4   2  12  357.58   43.87
  -4  -2  12  349.89   49.30
  -4  -2  11   -2.51    8.16
  -4   2  11    1.27    3.62
  -4   2  10  140.45   24.82
  -4  -2  10  149.71   29.03
   4  -2 -10  134.81   14.79
  -4   2   9   31.55    9.74
  -4  -2   9   27.39    9.02
   4  -2  -9   24.32    5.02
  -4   2   8 1566.76   72.96
  -4  -2   8 1590.31   85.35
  -4   2   7   -3.66    4.70
  -4  -2   7   -2.80    5.41
  -4   2   6   20.77    8.55
  -4  -2   6   21.32    9.47
  -4   2   6   28.00   10.11
   4  -2  -6   23.04    7.11
  -4  -2   5  143.02   22.63
  -4  -2   5  120.72   12.15
  -4   2   5  169.00   24.55
   4  -2  -5  142.17   23.92
   4  -2  -4 2439.45   39.95
   4  -2  -4 2567.35   99.40
  -4  -2   3   41.12   13.43
   4  -2  -3   23.09    4.21
   4  -2  -3   21.33   10.35
  -4   2   3   36.29   11.82
  -4   2   2   11.56    3.12
  -4  -2   2   16.76    8.81
   4  -2  -2    5.11    4.00
  -4   2   1   37.46   11.06
  -4  -2   1   50.56   14.56
  -4   2   0  138.78   18.87
  -4  -2   0  142.94   22.82
  -4   2   0  156.15   22.47
   4   2   1   20.32    7.32
  -4   2  -1   22.45    9.43
  -4  -2  -1   25.29    9.57
  -4   2  -2 1483.11   63.24
   4  -2   2 1416.89   62.06
  -4   2  -2 1518.56   78.03
  -4  -2  -2 1592.69   79.15
  -4   2  -3    4.49    5.38
  -4   2  -3   12.42    6.81
  -4  -2  -3   15.05    6.59
   4   2   3   17.36    8.34
   4  -2   3   11.49    5.20
  -4   2  -4  307.69   28.27
   4  -2   4  316.91   25.89
  -4  -2  -4  364.43   39.84
  -4   2  -5   91.40   16.20
  -4  -2  -5  114.93   22.30
  -4   2  -6  324.31   30.81
  -4   2  -6  300.29   40.22
  -4  -2  -6  371.68   38.43
  -4   2  -7  212.31   26.63
  -4   2  -7  198.20   34.81
  -4  -2  -7  238.01   30.51
  -4  -2  -8   -2.33    5.95
  -4   2  -8    8.73    6.50
  -4   2  -9   -7.08    9.76
  -4  -2  -9   -4.18    7.11
  -4   2  -9    2.23    4.69
  -4   2 -10   59.16   15.08
  -4  -2 -10   32.66   10.68
  -4   2 -10   40.95   17.35
  -4   2 -11    3.76    3.53
  -4   2 -11   20.26   10.68
  -4   2 -12   14.19    9.41
  -4   2 -12    5.62    4.50
  -4   2 -13   19.78   10.97
  -4   2 -13   24.45   10.29
  -4   2 -14   12.47   13.26
  -4  -3  15   13.49   15.18
  -4  -3  14  127.83   33.49
  -4  -3  13   15.40   14.71
  -4   3  12   -6.46   10.02
  -4  -3  12    1.67    6.76
  -4  -3  11   89.43   23.26
  -4   3  11  101.86   22.18
  -4   3  10  496.71   44.93
  -4  -3  10  437.84   51.35
  -4   3   9  166.43   23.82
  -4  -3   9  147.09   26.95
  -4   3   8    2.80    3.54
  -4  -3   8    1.64    3.21
   4  -3  -8    3.65    5.97
  -4   3   7   21.65    6.71
  -4  -3   7   17.69    8.43
  -4   3   7   27.33   11.53
  -4  -3   7   19.04    5.55
   4  -3  -7   26.14   10.23
  -4  -3   6  999.69   46.63
  -4  -3   6 1050.72   66.52
  -4   3   6 1167.11   65.15
  -4   3   6 1092.83   51.03
   4  -3  -6 1179.74   67.08
  -4  -3   5  123.26   21.89
  -4   3   5  139.10   17.94
  -4   3   5  141.71   22.29
   4  -3  -5  138.66   23.70
   4  -3  -4  100.27   17.08
  -4   3   4  121.60   22.48
  -4   3   3   -1.29    7.56
   4  -3  -3    5.04    3.46
   4  -3  -3   -5.10    6.54
   4  -3  -2 2801.36   94.76
   4  -3  -2 2889.01   66.63
  -4   3   2 2931.94  110.51
   4  -3  -1  265.37   22.28
  -4  -3   1  297.13   32.88
  -4   3   1  289.11   30.96
   4  -3   0  732.69   41.66
  -4  -3   0  782.43   54.01
  -4   3   0  774.84   47.61
  -4   3  -1   62.61   12.12
   4  -3   1   81.46   14.54
  -4  -3  -1   73.76   17.04
  -4   3  -2 1578.30   63.14
  -4   3  -2 1566.49   76.80
  -4  -3  -2 1631.05   77.84
  -4   3  -3  105.39   16.54
   4  -3   3  105.33   16.85
  -4  -3  -3  114.37   19.72
  -4   3  -3  101.57   22.71
   4   3   3  133.28   25.08
  -4   3  -4  333.89   30.25
  -4   3  -4  316.97   39.80
   4  -3   4  338.54   29.22
  -4  -3  -4  314.00   34.40
   4   3   4  363.90   40.10
  -4   3  -5   10.97    7.20
  -4   3  -5   17.24   10.99
  -4  -3  -5   11.83    6.76
  -4   3  -6   28.88   10.38
  -4   3  -6   32.65   12.82
  -4  -3  -6   27.80   11.45
  -4   3  -7   16.47    8.84
  -4   3  -7   20.67   11.87
  -4  -3  -7   28.76    9.75
  -4   3  -8  175.62   26.13
  -4   3  -8  156.52   32.60
  -4  -3  -8  198.98   29.18
  -4   3  -9   84.73   19.79
  -4   3  -9   86.28   24.68
  -4  -3  -9  130.24   23.38
  -4   3 -10    6.94    8.65
  -4   3 -10    9.66   11.55
  -4   3 -11   26.24   11.48
  -4   3 -11   33.15   17.88
  -4   3 -12   33.38   19.67
  -4   3 -12   49.76   15.55
  -4   3 -13   10.97   14.27
  -4   3 -13   19.03   10.74
  -4   3 -14   30.92   22.15
  -4  -4  15   16.93   17.40
  -4  -4  14   26.16   18.35
  -4  -4  13    8.79   11.85
  -4  -4  12  156.34   32.86
  -4  -4  11   59.14   19.62
  -4   4  11   66.33   14.96
  -4  -4  10   37.71   15.86
  -4   4  10   44.18   13.28
  -4  -4   9   -8.19   10.62
  -4   4   9    1.01    1.82
   4  -4  -8 1183.28   59.44
  -4  -4   8 1257.83   78.93
  -4   4   8 1281.33   59.60
  -4  -4   8 1234.30   80.58
  -4   4   7    2.01    1.71
  -4  -4   7    3.55    3.60
  -4  -4   7   -2.44    6.46
  -4   4   7    9.41    6.99
   4  -4  -7   -3.36    5.72
  -4   4   6    3.40    3.16
  -4  -4   6    0.11    4.05
   4  -4  -6   -3.77    4.80
  -4   4   6    8.76    6.83
  -4  -4   5   24.25   11.05
  -4   4   5   22.11    6.71
   4  -4  -5   14.67    6.36
  -4   4   5   17.44    6.01
   4  -4  -4  645.99   43.42
  -4   4   4  797.07   60.37
  -4   4   3   19.47    8.67
   4  -4  -2  705.17   35.64
  -4   4   2  730.99   48.17
   4  -4  -1   20.66    7.08
  -4   4   1   61.97   16.55
  -4   4   0  879.78   48.71
   4  -4   0  972.25   49.52
  -4   4   0  855.96   48.30
  -4  -4  -1    2.45    3.95
  -4   4  -1    0.30    1.99
  -4   4  -1    3.53    2.78
  -4   4  -2  176.25   21.47
  -4  -4  -2  192.40   25.34
  -4   4  -3   12.81    7.07
  -4  -4  -3    9.64    8.26
  -4   4  -4   81.34   15.67
  -4   4  -4   96.56   23.73
  -4  -4  -4   85.16   16.75
   4   4   5   49.26   10.06
  -4   4  -5   58.63   15.09
  -4   4  -5   83.83   22.82
  -4  -4  -5   86.90   17.04
   4   4   6  289.65   30.57
  -4   4  -6  312.87   33.58
  -4   4  -6  317.31   43.52
  -4  -4  -6  301.03   34.23
   4   4   7   32.02    5.29
  -4   4  -7   44.49   19.55
  -4  -4  -7   27.67   10.25
  -4   4  -7   30.77   11.70
  -4  -4  -8   -1.13    3.11
  -4   4  -8    4.34    4.37
  -4   4  -9   11.59    8.68
  -4  -4  -9    5.57    2.29
  -4   4 -10   47.23   22.49
  -4   4 -10   29.09   11.97
  -4   4 -11    7.16    7.40
  -4   4 -11   19.05   18.34
  -4   4 -12   14.59   10.62
  -4   4 -12   16.38   16.56
  -4   4 -13   23.16   12.75
  -4   4 -13   29.45   21.20
  -4   4 -14   17.40   11.79
  -4  -5  14   79.91   27.15
  -4  -5  13    9.53   11.69
  -4  -5  12   15.86   10.36
  -4  -5  11    2.59    2.34
  -4  -5  10  635.26   64.05
  -4  -5   9   51.28   15.53
  -4   5   9   56.20   11.50
  -4  -5   8   57.68   18.24
  -4   5   8   59.59   11.62
  -4   5   8   75.56   15.17
  -4  -5   7   -2.56    4.89
   4  -5  -7    2.27    3.39
  -4   5   7    0.11    1.73
   4  -5  -6  724.89   41.10
  -4   5   6  722.15   33.58
  -4  -5   6  691.76   57.70
  -4   5   6  675.16   51.31
  -4   5   5   45.12    7.59
   4  -5  -5   46.15   10.75
  -4  -5   5   45.08   12.37
  -4   5   5   54.20   15.17
  -4  -5   4   10.34    7.77
  -4   5   4   -4.51    7.58
  -4   5   3   82.54   18.48
  -4   5   2 1526.81   56.55
  -4   5   2 1607.19   69.91
  -4   5   1   43.26    9.11
  -4   5   1   51.78   10.98
  -4   5   0  495.70   35.99
  -4   5   0  484.25   35.88
  -4   5  -1  144.31   19.54
  -4   5  -1  137.83   20.07
  -4   5  -2  598.74   41.03
  -4  -5  -3   36.50   11.00
  -4   5  -3   25.43   10.42
  -4   5  -4   -3.24    6.59
  -4  -5  -4   11.64    6.78
  -4   5  -4   12.00    7.31
  -4   5  -5   63.25   15.20
  -4   5  -5   75.82   13.48
  -4  -5  -5   88.60   17.11
   4   5   6    2.39    8.98
  -4   5  -6   24.88   10.46
  -4  -5  -6   23.06    9.16
  -4   5  -6   11.07    1.76
   4   5   7    6.99    6.19
  -4   5  -7    6.24    6.12
  -4  -5  -7    2.14    3.72
  -4   5  -7   -3.17    5.84
  -4   5  -8  110.44   22.08
  -4  -5  -8  112.73   19.64
  -4   5  -8  107.38   17.31
  -4   5  -9   21.13   11.01
  -4   5  -9   11.97    1.51
  -4   5 -10    1.31    4.99
  -4   5 -11    6.26    9.02
  -4   5 -12   34.80   16.25
  -4   5 -13   10.76   10.44
  -4   5 -14   14.19   11.26
  -4  -6  13    2.56    9.42
  -4  -6  12   61.75   22.98
  -4  -6  11   -0.58    4.61
  -4  -6  10    7.21    7.37
  -4  -6   9   -3.46    6.29
  -4   6   8  350.22   31.53
  -4  -6   8  293.23   41.72
  -4  -6   7   32.86   13.31
  -4   6   7   35.86   11.67
  -4   6   7   20.73    4.43
  -4  -6   6    8.44    7.39
  -4   6   6    2.59    3.34
  -4   6   6    5.96    2.33
  -4   6   5  129.54   10.80
  -4  -6   5  133.58   25.28
  -4   6   5  152.57   25.89
  -4   6   4  269.66   17.54
  -4  -6   4  290.83   36.34
  -4   6   4  296.01   34.73
  -4   6   3   47.93    8.04
  -4   6   3   70.32   18.73
  -4   6   2   79.18   13.96
  -4   6   2   94.61   12.45
  -4   6   1   -1.47    0.88
  -4   6   1    2.22    2.26
  -4   6   0  326.16   30.20
  -4   6   0  292.20   26.80
  -4   6  -1  163.53   22.22
  -4   6  -2  105.24   18.79
  -4   6  -2  109.25   18.22
  -4   6  -3  118.04   20.22
  -4   6  -3   99.69   17.04
  -4   6  -4    1.02    2.44
  -4   6  -4   -1.02    6.46
  -4   6  -5   -1.88    5.40
  -4   6  -5    1.89    1.02
  -4   6  -6  425.27   41.04
  -4   6  -6  418.56   36.78
  -4   6  -7   -1.99    4.05
  -4   6  -7   -0.87    5.28
  -4   6  -8   40.21   11.23
  -4   6  -8   31.05   10.44
  -4   6  -9    0.06    5.60
  -4   6  -9   10.24    7.69
  -4   6 -10   40.27   15.18
  -4   6 -11    2.77    3.81
  -4   6 -12   23.41   12.39
  -4   6 -13   10.58    8.30
  -4   6 -14   17.70   12.74
  -4  -7  13    1.22    4.80
  -4  -7  12   58.98   21.50
  -4  -7  11    4.84    4.51
  -4  -7  10   99.95   26.36
  -4  -7   9   -4.63    8.24
  -4  -7   8   34.76   14.97
  -4  -7   7    9.63    6.72
  -4   7   7   14.53    4.89
  -4  -7   6  617.08   59.56
  -4   7   6  781.01   62.65
  -4  -7   5   11.75    7.88
  -4   7   5   -0.59    7.83
  -4  -7   4   29.06   11.09
  -4   7   4   45.19   15.70
  -4  -7   3   -0.87    2.64
  -4   7   3    1.78    1.66
  -4   7   2  746.75   46.10
  -4   7   2  691.50   34.02
  -4   7   1    4.61    3.50
  -4   7   1    2.74    2.40
  -4   7   0  584.91   41.50
  -4   7   0  523.24   37.50
  -4   7  -1    2.87    4.74
  -4   7  -1   -9.86    9.34
  -4   7  -2  120.25   20.65
  -4   7  -2  114.76   18.75
  -4   7  -3    2.21    3.60
  -4   7  -3   -3.07    6.51
  -4   7  -4  605.41   47.68
  -4   7  -4  563.45   45.15
  -4   7  -5   58.72   16.60
  -4   7  -5   58.30   13.99
  -4   7  -6  610.47   53.12
  -4   7  -6  654.52   49.38
  -4   7  -7   21.01    8.81
  -4   7  -7    8.17    6.01
   4   7   7   18.42    8.42
  -4   7  -8   21.19   10.06
  -4   7  -8   25.40    9.87
   4  -7   8   45.51   18.84
  -4   7  -9   -6.30    6.98
  -4   7  -9  -10.43   10.26
   4  -7   9   18.58   15.54
   4  -7  10   38.42   19.28
  -4   7 -10    3.47    2.03
  -4   7 -11   -0.37    1.55
  -4   7 -12   -2.41    7.26
  -4   7 -13    8.40    7.28
  -4  -8  12   28.06   16.80
  -4  -8  11    5.88    8.39
  -4  -8  10   42.06   16.73
  -4  -8   9   28.27   13.75
  -4  -8   8   30.03   14.75
  -4  -8   7   22.19   12.48
  -4   8   6   91.54   21.67
  -4  -8   6   76.62   21.90
  -4  -8   5   53.40   17.52
  -4   8   5   63.45   18.45
  -4  -8   4  228.22   34.85
  -4   8   4  277.02   32.62
  -4   8   3    4.98    2.04
  -4  -8   3    4.81    2.18
  -4   8   2  123.49   19.20
  -4   8   2  129.00   14.39
  -4  -8   2  165.64   28.67
  -4   8   1  221.21   26.69
  -4   8   1  210.12   21.99
  -4   8   0  128.29   21.26
  -4   8   0  126.45   22.54
  -4   8   0  114.48   17.88
  -4   8  -1   -8.35    8.66
  -4   8  -1   -1.06    1.71
  -4   8  -2  114.96   20.79
  -4   8  -2  106.15   19.48
  -4   8  -3    4.16    3.09
  -4   8  -3    1.43    2.98
  -4   8  -4   58.08   15.45
  -4   8  -4   47.25   12.53
  -4   8  -5   11.12    5.42
  -4   8  -5   -2.25    3.31
  -4   8  -6   18.35    7.24
  -4   8  -6   26.06    9.99
  -4   8  -7   -1.84    8.23
  -4   8  -7    4.01    4.77
   4  -8   7   14.74   12.56
  -4   8  -8    8.81    5.30
  -4   8  -8   -2.03    8.94
  -4   8  -9    8.32    5.48
  -4   8  -9    4.42    4.32
  -4   8 -10   10.72    8.53
   4  -8  10   42.38   20.76
   4  -8  11   37.61   19.84
  -4   8 -11    7.44    4.29
  -4   8 -12  -10.12   10.11
  -4  -9  11   15.14   12.42
  -4  -9  10   90.43   27.28
  -4  -9   9    6.39    9.71
  -4  -9   8   15.44    8.52
  -4  -9   7    1.30    8.53
  -4  -9   6  374.68   49.73
  -4   9   6  434.70   49.70
  -4  -9   5    3.24    4.38
  -4   9   5   23.70   12.71
  -4  -9   4   64.37   18.96
  -4   9   4  106.11   23.66
  -4  -9   3   14.60    9.50
  -4   9   3    9.83    4.23
  -4   9   2  148.04   22.39
  -4  -9   2  160.56   28.48
  -4   9   1    5.28    5.64
  -4  -9   1    6.51    8.27
  -4   9   0   -0.29    6.88
  -4   9   0    3.89    4.53
  -4   9  -1    3.29    4.29
  -4   9  -1   -4.30    7.72
  -4   9  -2    5.29    5.97
  -4   9  -2    2.81    2.88
  -4   9  -3    4.72    3.37
  -4   9  -3    4.71    1.46
  -4   9  -4  114.37   32.70
  -4   9  -4  230.03   32.18
  -4   9  -5    1.00    2.88
  -4   9  -5   -3.44    7.93
  -4   9  -6    8.66    6.17
  -4   9  -6   -2.10    4.62
   4  -9   7   39.50   16.96
  -4   9  -7   50.82   16.21
  -4   9  -7    7.04   10.11
   4  -9   8   69.79   23.39
  -4   9  -8   27.77   12.41
  -4   9  -8   65.91   17.91
  -4   9  -9    1.41    1.86
  -4   9  -9   -2.53    8.98
  -4   9 -10  -16.14   11.58
   4  -9  10   21.12   15.33
   4  -9  11   36.85   19.86
  -4 -10  10   10.24    5.56
  -4 -10   9   34.53   16.64
  -4 -10   8   46.83   17.64
  -4 -10   7    3.79    4.25
  -4 -10   6    5.09    6.10
  -4 -10   5   -1.15    5.40
  -4  10   5   29.19   16.59
  -4  10   4   67.75   18.56
  -4 -10   4   71.88   21.78
  -4 -10   3   65.46   19.16
  -4  10   3   61.99   14.47
  -4  10   2  277.92   30.68
  -4 -10   2  252.59   37.46
  -4  10   1  103.47   19.56
  -4 -10   1  105.25   23.65
  -4  10   0  298.77   34.18
  -4  10   0  302.98   37.52
  -4 -10   0  345.92   42.59
  -4  10  -1    9.31    3.78
  -4  10  -1   11.39    8.34
  -4  10  -2    6.44    3.09
  -4  10  -2    3.75    2.84
  -4  10  -3    2.10    1.43
  -4  10  -3   -2.24    4.66
  -4  10  -4   45.09   14.15
  -4  10  -4   33.64   12.38
  -4  10  -5    8.99    7.78
  -4  10  -5    4.79    2.35
  -4  10  -6  -13.39   11.44
  -4  10  -6   -0.44    3.23
  -4  10  -7   -1.37    4.06
  -4  10  -7  -12.37   10.98
   4 -10   8   24.50   14.52
  -4  10  -8   -5.01   10.66
  -4  10  -8   12.34    9.53
  -4  10  -9  -12.10   12.66
  -4  10  -9   -1.90    5.55
   4 -10   9   18.87   15.10
   4 -10  10   37.17   20.03
  -4 -11   9    2.70    7.59
  -4 -11   8   -0.28    6.43
  -4 -11   7   30.69   16.44
  -4 -11   6   34.35   14.90
  -4 -11   5   -3.98    7.92
  -4  11   4   -5.95   10.15
  -4 -11   4    9.41    5.52
  -4 -11   3    3.98    7.33
  -4  11   3   -1.87    4.97
  -4 -11   2   11.98    8.82
  -4  11   2    9.04    6.88
  -4 -11   1    2.91    5.70
  -4  11   1   10.36    7.41
  -4  11   1  -11.36   12.72
  -4 -11   0   29.99   13.39
  -4  11   0    5.43    5.09
  -4  11   0   20.27   10.75
  -4  11  -1    1.83    2.99
  -4 -11  -1    3.01    5.37
  -4  11  -1   -1.09    7.63
  -4  11  -2   19.09    7.76
  -4  11  -2   17.92    8.83
  -4  11  -3   -4.78    6.81
  -4  11  -3   -7.17    6.30
  -4  11  -4   17.36   11.37
  -4  11  -4   29.61   12.32
  -4  11  -5    9.56    6.23
  -4  11  -5   -3.76    6.38
  -4  11  -6   -2.83    5.49
  -4  11  -6    1.66    3.77
  -4  11  -7    7.30    8.93
  -4  11  -7   -5.35   10.66
   4 -11   7   24.38   15.01
  -4  11  -8   16.65    8.91
   4 -11   8   35.92   18.29
  -4  11  -8   -8.87    9.45
  -4  11  -9   -6.06    6.03
   4 -11   9   41.46   20.38
  -4 -12   8   51.59   20.03
  -4 -12   7    2.60    3.50
  -4 -12   6    4.33    5.00
  -4 -12   5   -1.41    6.39
  -4 -12   4   85.23   24.71
  -4 -12   3   -1.50    4.61
  -4  12   3    1.61    2.54
  -4 -12   2    1.04    7.03
  -4  12   2    1.14    4.57
  -4 -12   1   19.25    8.54
  -4  12   1   24.59   10.58
  -4  12   1   14.04    4.06
  -4 -12   0   76.98   20.43
  -4  12   0   49.31   15.35
  -4  12   0   59.98   16.67
  -4  12  -1   -4.93    8.68
  -4  12  -1    5.58    3.83
  -4 -12  -1    5.94    6.96
  -4  12  -2   -4.07    8.03
  -4  12  -2   -0.47    5.39
  -4  12  -3   -2.02    6.61
  -4  12  -3   -3.95    4.82
  -4  12  -4   -9.61    7.33
  -4  12  -4   -3.20    9.45
  -4  12  -5   -6.70   10.37
  -4  12  -5   -5.72    7.98
  -4  12  -6   -9.76   10.81
  -4  12  -6   11.38   12.10
  -4  12  -7   -1.81    6.47
  -4  12  -8  -12.44    9.63
  -4  12  -9   -4.25    8.47
  -4 -13   7   12.98   10.97
  -4 -13   6    1.67    8.18
  -4 -13   5   -7.10   12.38
  -4 -13   4   12.42    7.47
  -4 -13   3   -7.81    9.77
  -4 -13   2    2.39    1.80
  -4  13   2    5.42    6.22
  -4 -13   1    1.78    7.60
  -4  13   1   15.90    9.03
  -4  13   0   -4.02    8.98
  -4  13   0    9.89    8.20
  -4  13  -1    5.22    6.24
  -4  13  -1  -11.61   12.42
  -4  13  -2    0.34    2.63
  -4  13  -2   -1.24    3.78
  -4  13  -3   -5.16    6.14
  -4  13  -3   -7.35    6.39
  -4  13  -4   -3.99    8.25
  -4  13  -4   -1.28    5.52
  -4  13  -5   -5.28    6.94
  -4  13  -5   23.21   15.18
  -4 -14   6   -5.52    6.28
  -4 -14   5    4.68    4.65
  -4 -14   4   21.69   12.58
  -4  14   1   19.18   11.05
  -4  14   0   17.56   10.31
  -4  14  -1    6.18    6.75
  -4  14  -2   11.33    9.10
  -4  14  -3    2.46    4.05
   4  14   4    8.50    5.07
  -4  15  -1    5.97    9.44
  -5   0  15   20.47   17.26
  -5   0  14   33.03   18.06
  -5   0  13   -1.17    2.16
  -5   0  12  157.87   33.12
  -5   0  11   -7.98   10.26
  -5   0  10  728.85   63.88
  -5   0   9   -2.43    6.41
  -5   0   8  653.49   55.73
  -5   0   7   -0.65    5.38
  -5   0   6 2431.55  102.34
  -5   0   5    9.50    9.26
  -5   0   4  201.48   30.16
  -5   0   3    1.11    0.96
  -5   0   3   -7.41    8.74
  -5   0   2 1587.16   62.57
  -5   0   2 1279.65   81.70
  -5   0   1    4.74    9.11
  -5   0   0  486.87   50.42
  -5   0  -1    4.83    5.74
  -5   0  -2  360.94   43.00
  -5   0  -3   -5.68    9.17
  -5   0  -4  145.09   24.24
  -5   0  -5   12.76    9.98
   5   0   5   -4.93    7.27
   5   0   6  574.46   32.23
  -5   0  -6  580.25   46.98
  -5   0  -7   16.73   10.32
  -5   0  -8   22.22   11.57
  -5   0  -9   20.41   12.54
  -5   0 -10   32.30   14.13
  -5   0 -11    6.56    8.74
  -5   0 -11   18.07   11.77
  -5   0 -12    0.25    7.74
  -5   0 -13  -16.19   15.89
  -5  -1  16  -16.14   19.60
  -5  -1  15   16.58   17.93
  -5   1  14  154.13   35.59
  -5  -1  14  154.13   35.68
  -5   1  13    3.29    6.26
  -5  -1  13   -5.68    8.34
  -5   1  12  139.58   29.15
  -5  -1  12  116.74   28.66
  -5   1  11   13.66    9.09
  -5  -1  11    4.61    4.51
  -5   1  10  301.97   38.98
  -5  -1  10  280.29   40.37
  -5   1   9    1.84    1.78
  -5  -1   9   -0.22    1.34
  -5   1   8  116.29   23.12
  -5  -1   8  115.78   24.02
  -5   1   7   62.32   15.69
  -5  -1   7   61.58   16.90
  -5   1   6  424.46   48.36
  -5  -1   6  466.64   45.82
  -5   1   6  449.25   42.08
  -5   1   5    1.05    4.30
  -5  -1   4 1439.69   85.62
  -5   1   4 1356.04   81.80
  -5  -1   3    8.07    7.84
  -5   1   3    9.37    6.89
  -5   1   2    8.55    4.29
  -5  -1   2    6.67    4.76
  -5   1   2   14.44   11.24
  -5   1   1   27.94    8.35
  -5  -1   1   28.90    8.27
  -5   1   1   50.21   16.29
  -5   1   0 3648.68  116.70
  -5  -1   0 3688.16  138.16
  -5   1   0 3846.51  143.51
  -5   1  -1   -3.98    8.02
  -5   1  -1   -0.84    4.86
  -5  -1  -1   12.86    9.55
  -5   1  -2   46.39   13.11
  -5   1  -2   48.64   13.51
  -5  -1  -2   60.05   17.28
  -5  -1  -3   13.34    7.95
  -5   1  -3   11.07    5.42
  -5   1  -3   20.86   10.93
   5  -1   4  187.36   22.42
  -5  -1  -4  237.76   34.08
  -5   1  -4  243.59   30.55
  -5  -1  -5   -4.86    8.35
   5  -1   5    5.88    4.43
  -5  -1  -6   43.89   13.27
   5   1   6   37.98    6.54
   5  -1   6   51.35   11.09
  -5   1  -6   53.62   17.29
  -5   1  -6   75.93   20.13
  -5  -1  -7   18.13    6.66
  -5   1  -7   15.84    5.67
  -5   1  -8   -5.77   10.57
  -5  -1  -8    2.41    3.36
  -5  -1  -9   -3.52    3.69
  -5   1  -9  -11.35   10.93
  -5  -1 -10   56.08   15.93
  -5   1 -10   45.90   16.05
  -5   1 -10  100.94   23.89
  -5   1 -11    3.83    2.71
  -5  -1 -11   -6.80    6.87
  -5   1 -12    7.46    3.00
  -5   1 -12   63.81   19.71
  -5  -1 -13   -5.25   10.96
  -5   1 -13   -0.97    3.77
  -5  -2  15    3.21   11.02
  -5  -2  14   19.26   15.63
  -5   2  13   16.97   13.79
  -5  -2  13   -2.51    4.77
  -5   2  12  256.58   39.64
  -5  -2  12  232.46   41.39
  -5  -2  11   -0.39    4.05
  -5   2  11    7.25    4.92
  -5   2  10  136.33   25.71
  -5  -2  10  134.86   29.06
  -5   2   9  194.29   28.36
  -5  -2   9  204.48   34.40
  -5   2   8  449.37   43.25
  -5  -2   8  420.00   48.43
  -5   2   7    3.08    2.09
  -5  -2   7    3.50    4.76
  -5   2   7   15.32   10.70
  -5   2   6 1336.61   71.16
  -5  -2   6 1397.09   81.47
  -5   2   6 1396.97   80.18
  -5   2   5   54.13   14.82
  -5   2   4  308.12   39.08
  -5  -2   3  149.37   26.85
  -5   2   3  172.52   29.73
  -5  -2   2  539.15   52.59
  -5   2   2  512.00   53.34
  -5   2   1   31.67   11.18
  -5  -2   1   27.28    7.55
  -5   2   0    3.05    2.90
  -5   2   0    4.72    5.85
  -5  -2   0   -6.72    8.36
  -5   2  -1   89.75   19.25
  -5  -2  -1  103.24   22.22
  -5   2  -1   97.57   19.92
  -5   2  -2  532.94   51.03
  -5  -2  -2  607.56   55.40
  -5   2  -2  540.29   44.06
  -5   2  -3    5.87    4.14
  -5  -2  -3   15.80    9.57
  -5   2  -4  229.16   30.07
  -5   2  -4  220.54   33.96
  -5  -2  -4  274.26   36.51
  -5   2  -5   39.66   14.74
   5  -2   5   54.52   13.09
  -5   2  -5   52.27   17.71
  -5  -2  -5   63.22   18.37
  -5   2  -6  193.10   25.78
  -5   2  -6  185.76   34.06
  -5  -2  -6  241.64   34.83
  -5  -2  -7   -1.03    8.27
  -5   2  -7   -0.40    5.77
  -5   2  -7    2.87    7.72
   5   2   7    7.44    2.92
  -5  -2  -8   91.71   20.46
  -5   2  -8   67.61   14.34
  -5   2  -8   71.10   21.67
  -5  -2  -9   18.49    7.95
  -5   2  -9    9.84    2.74
  -5   2  -9   14.93    4.23
  -5   2 -10   10.36    5.74
  -5  -2 -10   24.21    7.66
  -5   2 -11   -8.92   11.14
  -5   2 -11  -10.28   11.35
  -5   2 -12  -12.30   12.36
  -5   2 -12   -2.60    7.96
  -5   2 -13    8.68   11.22
  -5  -3  15    7.32    8.75
  -5  -3  14  112.94   32.11
  -5  -3  13    5.41    5.12
  -5  -3  12   53.66   19.89
  -5   3  12   48.80   16.44
  -5  -3  11   22.07   11.55
  -5   3  11    8.65    5.48
  -5   3  10  164.24   27.27
  -5  -3  10  155.50   30.84
  -5   3   9   -4.27    6.31
  -5  -3   9    7.76    5.35
  -5   3   8  423.53   39.43
  -5  -3   8  425.90   49.49
  -5   3   7    0.50    3.33
  -5  -3   7   -1.16    3.41
  -5   3   7    2.25    6.49
  -5  -3   7    2.24    3.77
   5  -3  -6  200.40   12.04
  -5  -3   6  171.19   18.21
  -5  -3   6  216.30   32.41
  -5   3   6  219.47   27.12
  -5   3   6  216.46   31.82
   5  -3  -5  214.02   14.13
  -5   3   5  216.45   31.29
   5  -3  -4  780.12   30.90
  -5   3   4  938.89   70.19
  -5   3   3    1.90    5.87
   5  -3  -3   -2.78    3.24
  -5  -3   2   35.58   14.58
  -5   3   2   22.10   10.95
  -5  -3   1   55.89   16.48
  -5   3   1   55.19   15.64
  -5  -3   0 1172.90   76.21
  -5   3   0 1156.43   66.96
  -5   3  -1   55.55   15.36
  -5  -3  -1   54.86   15.47
  -5   3  -1   97.88   21.41
  -5   3  -2  167.92   27.92
  -5  -3  -2  161.62   27.46
  -5   3  -2  189.10   27.82
  -5   3  -3    7.94    5.23
  -5   3  -3   24.32   12.35
  -5  -3  -3   28.05   11.18
  -5   3  -4  561.27   42.34
  -5   3  -4  550.95   53.78
  -5  -3  -4  626.07   54.93
  -5   3  -5    3.92    4.24
  -5   3  -5    7.90    6.83
  -5  -3  -5   11.22    7.66
  -5   3  -6   43.78   12.77
  -5   3  -6   25.13    9.87
  -5  -3  -6   65.56   17.18
  -5   3  -7   21.57   12.88
  -5   3  -7   21.17    9.11
  -5  -3  -7   34.45   14.18
  -5   3  -8   72.47   18.44
  -5   3  -8   64.98   20.72
  -5  -3  -8  110.30   24.41
  -5   3  -9    0.37    6.26
  -5   3  -9    2.71    5.21
  -5  -3  -9    1.19    4.44
  -5   3 -10   19.12   12.14
  -5   3 -10   16.54    8.37
  -5   3 -11    7.35    5.52
  -5   3 -11    4.84    4.73
  -5   3 -12   -0.04    2.94
  -5   3 -12    3.16   10.89
  -5   3 -13    1.81    2.93
  -5   3 -13    1.59    6.82
  -5  -4  14    4.35    8.97
  -5  -4  13   19.69   12.55
  -5  -4  12  118.88   30.90
  -5  -4  11   14.29    7.50
  -5  -4  10   43.79   15.49
  -5   4  10   45.39   13.79
  -5   4   9   -0.58    3.16
  -5  -4   9   -0.05    1.80
  -5   4   8   51.06   12.46
  -5  -4   8   58.35   19.54
  -5   4   8   72.34   17.94
  -5   4   7    1.18    1.40
  -5  -4   7   -5.17    7.34
  -5   4   7    3.95    5.01
  -5  -4   7   -0.68    1.27
  -5  -4   6  830.89   65.74
  -5   4   6  798.39   47.74
  -5   4   6  782.01   62.81
  -5  -4   5   41.17   14.60
  -5   4   5   42.14   14.17
   5  -4  -4   39.76    8.26
  -5   4   4   61.75   18.99
  -5   4   3   -7.16    9.90
   5  -4  -3    2.19    2.13
   5  -4  -2 1294.23   53.61
  -5   4   2 1259.70   75.89
  -5  -4   1   11.17   10.39
   5  -4  -1   -1.38    4.25
  -5   4   1   17.03   11.55
  -5  -4   0   23.41   11.48
  -5   4   0   61.06   18.18
  -5   4  -1  193.18   26.57
  -5  -4  -1  174.35   28.38
  -5   4  -2  404.98   36.50
  -5  -4  -2  452.42   44.95
  -5   4  -3   28.95   10.27
  -5  -4  -3   25.04    8.32
  -5   4  -4   71.34   16.24
  -5  -4  -4   71.69   18.56
  -5   4  -4   68.41   19.25
  -5   4  -5   50.49   19.68
  -5  -4  -5   56.20   14.19
  -5   4  -5   61.56   15.35
  -5   4  -6  242.14   29.87
  -5   4  -6  192.32   35.72
  -5  -4  -6  241.48   32.43
  -5   4  -7   87.73   20.17
  -5   4  -7   74.00   23.49
  -5  -4  -7   83.66   19.87
  -5   4  -8   23.43   14.01
  -5  -4  -8   25.31   10.71
  -5   4  -8   38.50   14.35
  -5   4  -9   21.79   14.27
  -5  -4  -9   22.67   11.68
  -5   4  -9   16.05    9.69
  -5   4 -10   -1.43    5.91
  -5   4 -10   12.47    8.61
  -5   4 -11    1.68    8.68
  -5   4 -11    2.15    5.28
  -5   4 -12   -3.61    6.68
  -5   4 -12   19.14   11.61
  -5   4 -13    2.60    5.87
  -5   4 -13    0.09    7.37
  -5  -5  14  101.93   32.86
  -5  -5  13    9.93   13.27
  -5  -5  12   22.12   11.84
  -5  -5  11   15.33   10.07
  -5  -5  10  250.78   41.53
  -5  -5   9    3.10    3.10
  -5   5   8  137.87   19.58
  -5  -5   8  146.45   30.30
  -5   5   8  166.62   26.52
  -5   5   7  172.31   20.84
  -5  -5   7  177.96   31.37
  -5   5   7  166.18   28.37
  -5   5   6   87.56   13.98
  -5  -5   6   93.59   23.59
  -5   5   6   97.12   22.05
  -5  -5   5    6.27    5.94
  -5   5   5   15.34   12.09
  -5   5   4  742.52   64.14
  -5   5   3    8.05    2.37
   5  -5  -3    9.63    5.83
  -5   5   2   96.23   21.07
  -5   5   1   20.62    7.18
  -5   5   1   65.28   18.70
  -5   5   0  585.83   43.82
  -5   5  -1  117.78   18.99
  -5   5  -2  460.38   39.73
  -5  -5  -2  483.06   46.91
  -5  -5  -3    2.00    2.75
  -5   5  -3    5.15    5.26
  -5   5  -4  349.45   36.43
  -5  -5  -4  368.57   40.60
  -5  -5  -5    5.72    1.94
  -5   5  -5    4.55    6.45
  -5   5  -6   61.68   18.89
  -5  -5  -6   69.76   17.31
  -5   5  -7   28.52   12.26
  -5  -5  -7   16.82    7.83
  -5   5  -8  104.98   22.03
  -5  -5  -8   88.32   21.09
  -5   5  -9   19.84   12.62
  -5   5 -10   10.26   10.48
  -5   5 -11   16.69   10.86
  -5   5 -12    8.73    8.90
  -5   5 -13   21.53   12.19
  -5   5 -14    5.60    6.67
  -5  -6  13    2.75    8.14
  -5  -6  12   93.35   29.54
  -5  -6  11   12.85   11.55
  -5  -6  10   97.84   26.72
  -5  -6   9    0.17    5.81
  -5  -6   8  177.04   34.57
  -5   6   8  170.37   27.02
  -5  -6   7   57.10   18.43
  -5   6   7   40.12   12.59
  -5   6   7   48.44    9.40
  -5   6   6  253.62   21.56
  -5  -6   6  256.80   39.50
  -5   6   6  343.71   43.24
  -5   6   5   76.50   20.12
  -5  -6   5   60.81   19.17
  -5  -6   4   22.50   12.47
  -5   6   4   17.42    7.08
  -5   6   3    7.81    9.76
  -5   6   3   -1.09    0.82
  -5   6   2  271.55   27.29
  -5   6   2  343.38   36.53
  -5   6   1   29.66   16.44
  -5   6   1    2.31    1.22
  -5   6   0   -9.63    7.94
  -5   6  -1   33.74   11.51
  -5   6  -2  122.13   21.55
  -5   6  -3   36.45   11.68
  -5   6  -4   10.43    6.80
  -5   6  -5   28.17   12.23
  -5  -6  -6   56.05   16.41
  -5   6  -6   53.83   15.96
  -5  -6  -7    5.71    5.28
  -5   6  -7    3.50    6.42
  -5   6  -8  100.42   22.99
  -5   6  -9    3.95    5.10
  -5   6 -10    6.26    7.59
  -5   6 -11   17.08   11.01
  -5   6 -12   37.56   15.97
  -5   6 -13    8.44    8.58
  -5  -7  12   16.92   12.73
  -5  -7  11    6.35    7.51
  -5  -7  10   21.86    8.78
  -5  -7   9   15.65   12.48
  -5  -7   8  376.32   52.82
  -5  -7   7  142.07   31.61
  -5   7   7  165.00   29.03
  -5  -7   6  125.67   28.05
  -5   7   6  199.86   34.92
  -5   7   5    1.53    9.79
  -5   7   5   11.94    3.74
  -5  -7   5   13.61    7.59
  -5  -7   4  404.83   49.11
  -5   7   4  409.92   46.08
  -5   7   3   50.98   16.29
  -5   7   3   17.15    5.87
  -5   7   2   96.52   15.22
  -5   7   2  173.47   27.70
  -5   7   1  -15.97   10.14
  -5   7   1    1.50    1.82
  -5   7   0  684.09   49.26
  -5   7  -1    3.82    3.77
  -5   7  -2   14.08    8.99
  -5   7  -3    5.18    6.46
  -5   7  -4  108.69   23.00
  -5   7  -5   10.64    9.38
  -5   7  -6    9.73    8.93
  -5   7  -7   26.85   14.05
  -5   7  -8   16.21   11.81
  -5   7  -9   -2.22    6.38
  -5   7 -10   14.43   10.68
  -5   7 -11    9.85   11.32
  -5   7 -12   11.44   11.06
  -5  -8  11    2.39    5.31
  -5  -8  10   38.62   15.99
  -5  -8   9   -2.09    9.54
  -5  -8   8  134.01   32.50
  -5  -8   7   -1.33    2.28
  -5   8   6   63.47   18.29
  -5  -8   6   46.78   18.44
  -5  -8   5    5.78    8.43
  -5   8   5   -6.95   10.87
  -5  -8   4    8.27    7.84
  -5   8   4   18.55   11.30
  -5  -8   3   10.70    9.90
  -5   8   3   36.73   16.82
  -5   8   2  308.31   36.19
  -5   8   1  139.52   22.65
  -5   8   0   12.80    7.20
  -5   8  -1   14.59    8.55
  -5   8  -2  390.35   39.31
  -5   8  -3    9.49    8.95
  -5   8  -4   69.65   19.90
  -5   8  -5   24.68   11.54
  -5   8  -6   11.03    9.87
  -5   8  -7    8.65    8.54
  -5   8  -8   45.10   19.19
  -5   8  -9   15.37   11.48
  -5   8 -10    5.47    6.72
  -5   8 -11    4.87    7.32
  -5  -9  11    4.59    6.61
  -5  -9  10   53.81   21.21
  -5  -9   9   -6.84    9.87
  -5  -9   8  115.58   31.53
  -5  -9   7    9.99    7.80
  -5   9   6   51.83   16.82
  -5  -9   6   35.33   16.90
  -5   9   5   33.43   13.58
  -5  -9   5   35.16   13.64
  -5  -9   4   81.66   23.57
  -5   9   4   96.49   23.27
  -5  -9   3    5.28    9.38
  -5   9   3   36.99   16.23
  -5   9   2   51.88   12.60
  -5  -9   2   66.41   20.30
  -5   9   1   -6.57    5.13
  -5   9   0    3.31    4.82
  -5   9  -1   29.23   10.95
  -5   9  -2   29.05   12.29
  -5   9  -3   11.51    8.54
  -5   9  -4   24.42   12.56
  -5   9  -5  -15.17   11.72
  -5   9  -5    1.24    4.31
  -5   9  -6   36.99   11.64
  -5   9  -6   45.74   17.82
  -5   9  -7    3.50    4.71
  -5   9  -7   20.54   11.87
  -5   9  -8   51.23   15.67
  -5   9  -8   39.12   16.46
  -5   9  -9   11.43   10.28
  -5 -10  10    6.90    8.78
  -5 -10   9    2.33    8.13
  -5 -10   8   30.58   14.07
  -5 -10   7   11.67   12.12
  -5 -10   6    8.62    6.78
  -5 -10   5    1.91    2.50
  -5  10   5   16.14   10.03
  -5 -10   4   -4.22    2.42
  -5  10   4   28.41   15.17
  -5  10   3   34.26   18.22
  -5 -10   3   -3.08    2.86
  -5  10   2  229.34   30.26
  -5 -10   2  278.88   42.13
  -5 -10   1    6.86    4.60
  -5  10   1   14.02    8.10
  -5  10   0    5.89    6.20
  -5  10  -1   32.69   12.48
  -5  10  -2   99.21   21.78
  -5  10  -3    8.60    9.46
  -5  10  -4  -18.37   12.74
  -5  10  -4    0.96    2.53
  -5  10  -5    0.76    6.93
  -5  10  -5    7.57    8.71
  -5  10  -6   -8.14   10.24
  -5  10  -6    5.20    8.68
  -5  10  -7   13.09    9.79
  -5  10  -7   -1.82    4.62
  -5  10  -8   -7.52   10.95
  -5  10  -8   13.44   11.46
  -5  10  -9   -8.06   10.87
  -5 -11   9   -0.75    5.43
  -5 -11   8   -6.40   10.34
  -5 -11   7    4.15    5.26
  -5 -11   6   -4.83    5.86
  -5 -11   5    7.70    8.11
  -5 -11   4  100.19   28.64
  -5  11   4  153.41   29.82
  -5  11   3   21.24   14.17
  -5 -11   3   13.36   10.35
  -5 -11   2   -0.91    2.43
  -5  11   2    3.60    2.96
  -5 -11   1    3.71    8.63
  -5  11   1    1.20    4.22
  -5 -11   0   16.82   11.54
  -5  11   0   18.41    9.17
  -5  11  -1    6.22    6.85
  -5  11  -2   10.03    9.51
  -5  11  -3   -7.64   11.22
  -5  11  -3    0.64    4.51
  -5  11  -4   26.76    9.62
  -5  11  -4   34.82   15.67
  -5  11  -5  -14.56   11.36
  -5  11  -5    0.44    4.15
  -5  11  -6   -1.49    7.80
  -5  11  -6   13.85   11.49
  -5  11  -7   -1.80    4.36
  -5  11  -7   -4.22   10.20
  -5  11  -8   15.30    9.50
  -5  11  -9  -15.75   14.70
  -5 -12   7   -7.14    8.96
  -5 -12   6   22.98   15.62
  -5 -12   5    4.67    8.64
  -5 -12   4    1.34    4.64
  -5  12   3  -15.98   12.38
  -5 -12   3   -1.19    4.60
  -5 -12   2    0.61    4.40
  -5  12   2    0.19    5.11
  -5 -12   1    2.85    6.64
  -5  12   1   10.57    8.88
  -5 -12   0    4.83    5.59
  -5  12   0   14.09    8.84
  -5  12  -1   15.42    9.36
  -5 -12  -1    9.38    8.97
  -5  12  -2   33.91   14.40
  -5  12  -3  -11.97   12.46
  -5  12  -3    9.15    8.03
  -5  12  -4    3.30    7.93
  -5  12  -4   14.22   10.38
  -5  12  -5   -2.53    9.15
  -5  12  -5   13.76   11.74
  -5  12  -6   -4.33   10.91
  -5  12  -7  -11.23   12.20
  -5  12  -8  -14.48   13.45
  -5 -13   6   -0.29    7.45
  -5 -13   5    4.88    6.78
  -5 -13   4   11.25    6.79
  -5 -13   3   -3.97    4.41
  -5 -13   2    2.49    6.24
  -5  13   2   -4.61    5.71
  -5 -13   1    1.66    3.83
  -5  13   1    3.72    3.70
  -5  13   0   17.76   11.21
  -5  13  -1    5.17    7.71
  -5  13  -2    9.25    8.95
  -5  13  -3    8.24    8.27
  -5  13  -4   19.86   13.02
  -5 -14   5  -10.86   12.98
  -5 -14   4   -1.12    8.48
  -5 -14   3    8.21    7.58
  -5  14   1    7.69    7.68
  -5  14   0   18.51   11.70
  -5  14  -1   10.59    9.29
  -5  14  -2   25.10   13.88
  -6   0  15    6.65   11.92
  -6   0  14   97.06   28.60
  -6   0  13   -8.62   10.48
  -6   0  12   16.12   11.99
  -6   0  11   -6.79   11.48
  -6   0  10  294.60   44.01
  -6   0   9   -5.60    1.53
  -6   0   8   -2.12    5.16
  -6   0   7    2.24    6.14
  -6   0   6 1247.02   91.42
  -6   0   5   -5.33    8.20
  -6   0   4  347.76   45.88
  -6   0   3    1.13    1.15
  -6   0   3   -7.77   11.27
  -6   0   2  481.45   37.55
  -6   0   2  471.09   53.89
  -6   0   1    8.04   11.63
  -6   0   0   77.49   21.87
  -6   0  -1    9.50   10.88
  -6   0  -2  110.49   23.44
  -6   0  -3   -2.10    5.46
  -6   0  -4  353.50   44.04
  -6   0  -5  -14.85   12.83
   6   0   5  -14.29   12.43
  -6   0  -6    8.75    7.51
   6   0   6   10.46    5.72
  -6   0  -7   -4.46    6.88
  -6   0  -8   89.41   21.28
  -6   0  -9    0.70    3.82
  -6   0 -10    3.38    8.16
  -6   0 -10   13.16    8.00
  -6   0 -11    0.19    9.04
  -6   0 -11    4.79    1.62
  -6   0 -12    1.93    7.98
  -6  -1  15    8.40   13.42
  -6  -1  14   30.86   15.71
  -6  -1  13    4.84    5.05
  -6   1  13   -1.33    1.77
  -6   1  12  328.75   47.25
  -6  -1  12  326.47   50.94
  -6   1  11   -3.00    6.67
  -6  -1  11    1.95    6.60
  -6   1  10   24.42   12.36
  -6  -1  10   29.16   14.75
  -6   1   9   65.85   19.74
  -6  -1   9   61.63   19.77
  -6   1   8  369.26   43.98
  -6  -1   8  333.29   44.80
  -6   1   7  178.97   32.86
  -6  -1   7  182.67   32.63
  -6   1   7  168.31   30.33
  -6   1   6   46.31   15.71
  -6  -1   5   11.24   12.09
  -6   1   5  -21.55   17.34
  -6  -1   4  294.92   20.07
  -6  -1   4  268.06   38.59
  -6   1   4  219.69   35.29
  -6  -1   3  -10.11   14.48
  -6   1   3   15.24    8.54
  -6   1   2  875.59   46.71
  -6  -1   2 1123.02   83.32
  -6   1   1    6.63    5.57
  -6  -1   1    3.76    6.43
  -6   1   1   10.01    9.24
  -6   1   0  163.20   26.44
  -6  -1   0  175.71   32.66
  -6   1   0  160.85   29.73
  -6   1  -1   -3.13    7.94
  -6   1  -1    3.12    6.27
  -6  -1  -1    2.85    8.53
  -6   1  -2 1433.88   87.14
  -6  -1  -2 1562.48   96.27
  -6   1  -2 1305.71   85.00
  -6   1  -3   -1.59    4.17
  -6   1  -3   -2.17    7.89
  -6  -1  -3    0.12    6.74
  -6  -1  -4   68.35   20.53
  -6   1  -4   64.83   18.77
  -6   1  -4   55.06   16.11
  -6  -1  -5   31.33   12.92
  -6   1  -5   38.11   16.47
  -6   1  -5   33.15   13.37
  -6  -1  -6   67.42   18.33
   6  -1   6   60.01   14.00
  -6   1  -6   75.30   22.43
  -6   1  -6   81.00   20.18
  -6  -1  -7   -7.20    9.78
  -6   1  -7   -1.33    3.44
  -6   1  -7   15.77   10.87
  -6  -1  -8   -0.11   10.17
  -6   1  -8   14.69   12.45
  -6   1  -8   26.13   14.61
  -6  -1  -9   -4.07   10.24
  -6   1  -9   17.71   11.54
  -6  -1 -10   -2.17    9.00
  -6   1 -10   16.91    9.48
  -6   1 -11    5.11    9.65
  -6   1 -11   23.30   13.91
  -6   1 -12    9.43   12.69
  -6   1 -12   27.01   15.07
  -6  -2  15   16.60   15.68
  -6  -2  14   69.92   25.92
  -6  -2  13   -1.89    8.50
  -6  -2  12    2.10    3.61
  -6   2  12    0.18    3.91
  -6   2  11    4.15    5.25
  -6  -2  11    1.61    7.55
  -6   2  10  227.68   34.55
  -6  -2  10  253.68   43.30
  -6   2   9   70.36   19.12
  -6  -2   9   62.10   21.02
  -6   2   8   47.95   15.48
  -6  -2   8   53.62   17.52
  -6  -2   7   36.88   13.85
  -6   2   7   35.58   13.21
  -6   2   7   42.56   16.57
  -6   2   6  608.68   62.13
  -6   2   5   -4.74   12.12
  -6  -2   4  685.14   70.95
  -6   2   4  879.02   71.75
  -6  -2   3   23.48    8.66
  -6   2   3   43.63   18.21
  -6  -2   2  597.26   60.33
  -6   2   2  789.64   70.62
  -6   2   1   44.07   15.65
  -6  -2   1   29.03    8.63
  -6   2   0  203.17   28.26
  -6  -2   0  225.18   35.11
  -6   2   0  218.60   34.48
  -6   2  -1   39.53   13.49
  -6   2  -1   51.81   15.10
  -6  -2  -1   50.67   16.33
  -6   2  -2  292.23   39.08
  -6  -2  -2  349.30   44.99
  -6   2  -2  261.29   35.31
  -6   2  -3    3.44    4.72
  -6   2  -3   16.51   10.91
  -6  -2  -3   17.47   12.07
  -6   2  -4  320.35   44.07
  -6  -2  -4  366.18   46.08
  -6   2  -4  283.63   35.96
  -6   2  -5   -0.96    4.91
  -6  -2  -5    2.00    1.14
  -6   2  -6   10.41   10.82
  -6   2  -6   23.31   13.81
  -6  -2  -6    1.10    4.29
  -6   2  -7   22.87   13.86
  -6   2  -7   44.74   19.01
  -6  -2  -7   33.68   14.01
  -6   2  -8  175.48   38.30
  -6  -2  -8  192.55   32.93
  -6   2  -8  215.53   33.72
  -6  -2  -9    2.21    3.67
  -6   2  -9    1.75    4.81
  -6  -2 -10   10.10   10.12
  -6   2 -10    5.17    8.66
  -6   2 -11   -6.43    9.48
  -6   2 -11   35.73   19.02
  -6   2 -12   14.76   11.95
  -6   2 -12   42.58   17.56
  -6  -3  14   -0.95    5.28
  -6  -3  13   -4.44   12.61
  -6  -3  12  201.10   41.44
  -6   3  11   13.34    8.21
  -6  -3  11   -3.78   13.39
  -6   3  10   16.38    5.65
  -6  -3  10   29.11   15.90
  -6   3   9   34.56   13.03
  -6  -3   9   27.04   16.52
  -6   3   8  851.07   62.09
  -6   3   8  835.80   71.92
  -6  -3   8  826.86   74.55
  -6  -3   7   32.97   12.16
  -6   3   7   37.10   11.95
  -6   3   7   37.01   13.61
  -6  -3   6   11.83    8.90
  -6   3   6    5.38   10.21
  -6  -3   6    8.18    3.56
  -6   3   5   30.49    9.97
  -6   3   4  737.59   65.75
  -6  -3   3    5.62    3.68
  -6   3   3   10.68   11.57
  -6  -3   2  377.64   47.82
  -6   3   2  470.33   55.02
  -6   3   1   36.38    8.83
  -6  -3   1   23.19    8.95
  -6  -3   0   81.00   16.46
  -6   3   0  122.94   24.10
  -6  -3  -1  -15.86   16.30
  -6   3  -1   -5.06    7.74
  -6   3  -1    4.80    9.44
  -6   3  -2  223.08   32.95
  -6  -3  -2  270.80   39.17
  -6   3  -2  255.31   34.65
  -6   3  -3   69.34   19.89
  -6  -3  -3   89.97   21.68
  -6   3  -3   92.09   22.88
  -6   3  -4   -1.87    4.83
  -6  -3  -4    9.29    9.56
  -6   3  -5  106.46   25.95
  -6  -3  -5  156.34   30.05
  -6   3  -5  159.11   29.48
  -6   3  -6    0.86    7.86
  -6  -3  -6   20.79   12.26
  -6   3  -7   53.59   18.04
  -6   3  -7   62.29   22.42
  -6  -3  -7   67.58   19.86
  -6   3  -8  -11.38   10.84
  -6   3  -8    9.57    7.01
  -6  -3  -8   13.24   12.37
  -6   3  -9  -16.79   13.09
  -6   3  -9    1.47    4.71
  -6  -3  -9   12.03   11.44
  -6   3 -10   -7.42    4.22
  -6   3 -10    8.18    8.17
  -6   3 -11   -3.80    6.38
  -6   3 -11   24.17   13.66
  -6   3 -12    0.13    3.46
  -6   3 -12   54.86   24.29
  -6   3 -13   62.30   24.40
  -6  -4  14   76.61   29.70
  -6  -4  13   13.08    9.29
  -6  -4  12   -8.29   14.56
  -6  -4  11   -6.93   12.86
  -6  -4  10  270.65   47.84
  -6   4   9    3.64    3.08
  -6  -4   9   -5.02    7.99
  -6   4   8   48.18   14.70
  -6  -4   8   55.40   20.57
  -6   4   8   40.17   14.94
  -6   4   7    1.75    2.26
  -6  -4   7    0.39    3.45
  -6  -4   6  511.51   56.65
  -6   4   6  466.15   52.79
   6  -4  -5   -3.59    4.01
  -6   4   5    9.72   10.16
   6  -4  -4  269.51   21.93
  -6   4   4  376.17   48.76
  -6   4   3   73.23   19.84
  -6   4   2  481.73   51.25
  -6  -4   1    8.29    2.90
  -6   4   1    1.91    4.65
  -6  -4   0  301.19   42.36
  -6   4   0  301.49   37.54
  -6  -4  -1   -4.92    8.77
  -6   4  -1   24.14   14.93
  -6  -4  -2  228.66   34.68
  -6   4  -2  266.94   35.87
  -6  -4  -3  105.44   22.74
  -6   4  -3  139.62   27.43
  -6   4  -4  113.36   24.46
  -6   4  -4  105.29   25.72
  -6  -4  -4  140.42   26.03
  -6   4  -5   10.53    3.78
  -6   4  -5   16.70    8.93
  -6  -4  -5   17.24    5.84
  -6   4  -6  -12.67    9.62
  -6   4  -6   -5.97    9.89
  -6  -4  -6    7.44    6.51
  -6   4  -7   -0.80    6.94
  -6   4  -7   -7.90   11.81
  -6  -4  -7    4.28    6.20
  -6   4  -8   14.97    7.72
  -6   4  -8   17.79   10.84
  -6  -4  -8   25.67   12.62
  -6   4  -9   -3.03    5.69
  -6   4  -9   11.17    8.95
  -6   4 -10   43.99   14.13
  -6   4 -10   53.54   20.54
  -6   4 -11  -15.97   10.34
  -6   4 -11  -10.76   10.83
  -6   4 -12  -12.15   11.10
  -6   4 -12  -16.93   15.50
  -6   4 -13  -20.43   14.84
  -6  -5  13    5.48    4.95
  -6  -5  12  137.35   35.31
  -6  -5  11   -1.47    9.92
  -6  -5  10    1.78    6.89
  -6  -5   9   -1.71    7.55
  -6   5   9   27.74   15.23
  -6   5   8  251.43   29.81
  -6  -5   8  268.89   44.55
  -6   5   8  240.57   37.68
  -6   5   7    3.12    4.52
  -6  -5   7   -1.39    2.63
  -6   5   7  -11.50   15.36
  -6  -5   6  212.24   38.88
  -6   5   6  254.38   39.11
  -6   5   5    8.80   11.91
   6  -5  -4  615.48   37.17
  -6   5   4  766.74   69.59
  -6   5   3    3.91    1.69
  -6   5   2   73.13   18.37
  -6   5   1   12.75    9.96
  -6   5   0  178.62   30.51
  -6  -5  -1   45.70   16.10
  -6   5  -1  102.17   23.95
  -6   5  -2  294.27   37.32
  -6  -5  -2  286.20   39.26
  -6   5  -3  -17.55   11.00
  -6  -5  -3    1.84    5.40
  -6   5  -4    1.73    8.11
  -6  -5  -4    9.17    2.82
  -6   5  -5   -3.51    8.32
  -6  -5  -5    0.28    5.79
  -6   5  -6   40.31   11.94
  -6  -5  -6   32.26   10.95
  -6  -5  -7   -6.41   10.26
  -6   5  -7   -1.26    1.41
  -6  -5  -8  -15.73   11.93
  -6   5  -8    3.38    3.86
  -6   5  -9    4.89    4.95
  -6   5 -10    9.94    9.99
  -6   5 -11   -0.35    1.58
  -6   5 -12   -1.22    6.82
  -6  -6  12    0.03    9.11
  -6  -6  11   -3.62   10.63
  -6  -6  10  221.77   45.33
  -6  -6   9   -2.40    4.00
  -6  -6   8    4.82    4.48
  -6   6   8  -11.21   13.41
  -6  -6   7   56.16   19.44
  -6   6   7   51.19   15.32
  -6  -6   6  193.25   36.51
  -6   6   6  200.61   24.55
  -6   6   6  288.95   42.56
  -6  -6   5   83.34   22.89
  -6   6   5  118.10   29.13
  -6   6   4  105.73   24.55
  -6   6   3   76.62   20.45
  -6   6   2   45.25   16.03
  -6   6   1   14.63   13.42
  -6   6   0  572.22   51.20
  -6   6  -1   54.78   16.05
  -6   6  -2   -6.42    9.11
  -6   6  -3    4.82    4.03
  -6   6  -4  155.79   26.42
  -6  -6  -4  181.04   31.90
  -6  -6  -5    2.82    5.57
  -6   6  -5    6.54    3.77
  -6  -6  -6   41.58   15.30
  -6   6  -6   37.17   14.04
  -6  -6  -7    0.85    2.16
  -6   6  -7   14.25   10.34
  -6   6  -8   45.29   16.32
  -6   6  -9    5.99    2.30
  -6   6 -10   14.89   10.62
  -6   6 -11   10.07    9.34
  -6  -7  11  -18.38   12.30
  -6  -7  10    5.98   11.71
  -6  -7   9   20.61   14.65
  -6  -7   8  165.68   38.07
  -6  -7   7    7.46    8.45
  -6   7   7   12.27    8.74
  -6  -7   6   58.81   20.97
  -6   7   6   86.19   25.25
  -6   7   5   39.62   14.83
  -6  -7   5   24.12   14.99
  -6   7   4  170.15   31.49
  -6   7   3    9.35    7.29
  -6   7   2   29.70   14.16
  -6   7   1   55.58   19.99
  -6   7   0  216.93   33.57
  -6   7  -1  -14.46   11.26
  -6   7  -2   -6.19    7.87
  -6   7  -3    7.79    5.85
  -6   7  -4   53.14   16.38
  -6   7  -5   22.21   11.22
  -6   7  -6   50.21   17.08
  -6   7  -7   31.20   13.55
  -6   7  -8   10.65   10.87
  -6   7  -9    5.96    6.85
  -6   7 -10    6.27    9.05
  -6  -8  11    2.37   11.02
  -6  -8  10   75.60   26.84
  -6  -8   9   -5.71    7.65
  -6  -8   8   18.09   17.06
  -6  -8   7    4.73    9.90
  -6  -8   6   40.97   18.40
  -6   8   6   72.79   23.67
  -6   8   5   -8.30   12.79
  -6  -8   5    4.75    8.94
  -6  -8   4   50.52   19.26
  -6   8   4   38.94   13.86
  -6   8   3   12.87   11.38
  -6   8   2   40.20   17.19
  -6   8   1   90.18   24.21
  -6   8   0  315.28   36.41
  -6   8  -1   26.51    8.54
  -6   8  -2   22.44   10.74
  -6   8  -3    7.12    7.02
  -6   8  -4   57.51   18.22
  -6   8  -5    0.17    4.05
  -6   8  -6    7.11    8.51
  -6   8  -7   17.42   12.11
  -6   8  -8   41.75   17.76
  -6   8  -9   28.36   15.31
  -6  -9  10    5.05    6.15
  -6  -9   9   11.61   10.13
  -6  -9   8   56.44   21.38
  -6  -9   7    3.14    4.29
  -6  -9   6   35.29   17.00
  -6  -9   5   75.20   24.49
  -6   9   5   89.29   23.07
  -6  -9   4   94.76   26.71
  -6   9   4  105.94   24.53
  -6  -9   3    4.74    9.59
  -6   9   3   23.13   14.76
  -6   9   2   76.25   23.73
  -6   9   1   32.98   11.61
  -6   9   0    2.54    6.27
  -6   9  -1    1.72    6.77
  -6   9  -2   39.60   13.98
  -6   9  -3    5.50    5.61
  -6   9  -4   -2.47    5.87
  -6   9  -5   20.75   12.77
  -6   9  -6   58.62   20.55
  -6   9  -7   15.44   12.97
  -6   9  -8   23.49   16.17
  -6 -10   9   -0.22    5.95
  -6 -10   8   14.79   11.50
  -6 -10   7   40.57   18.09
  -6 -10   6   64.10   23.94
  -6 -10   5   35.56   17.80
  -6  10   5   15.98    4.20
  -6 -10   4   11.83    8.93
  -6  10   4   15.26   10.80
  -6 -10   3    6.20    7.63
  -6  10   3   32.90   16.97
  -6 -10   2   23.01   13.83
  -6  10   2   49.35   20.83
  -6  10   1  -21.19   12.35
  -6  10   0   17.13    8.18
  -6  10  -1    1.71    3.35
  -6  10  -2    9.85    7.86
  -6  10  -3    5.41    7.82
  -6  10  -4   12.37    9.25
  -6  10  -5    1.15    6.62
  -6  10  -6   26.66   13.39
  -6  10  -7   13.34   10.61
  -6 -11   7    1.44    9.03
  -6 -11   6    9.21   11.34
  -6 -11   5   -4.00    5.28
  -6 -11   4   58.40   23.93
  -6  11   4   61.55   21.40
  -6 -11   3    7.53    8.38
  -6  11   3   40.00   18.35
  -6 -11   2   12.92   12.70
  -6  11   2   54.51   21.66
  -6  11   1   -8.12   10.73
  -6 -11   1   15.71   11.92
  -6  11   0    9.51    5.04
  -6  11  -1    1.86    3.05
  -6  11  -2   12.78    9.87
  -6  11  -3    6.95    6.60
  -6  11  -4   22.02   13.11
  -6  11  -5   -0.19    5.53
  -6 -12   6   33.52   18.93
  -6 -12   5   12.73   11.19
  -6 -12   4    0.87    2.92
  -6 -12   3   -1.17    2.16
  -6  12   3   29.13   16.84
  -6 -12   2   -6.93   10.43
  -6  12   2   64.69   21.59
  -6  12   1  -24.38   13.90
  -6 -12   1    8.10    8.97
  -6 -12   0   33.88   16.43
  -6  12   0   28.16   11.80
  -6  12  -1   18.42   11.12
  -6  12  -2   13.78    8.64
  -6  12  -3   10.93   10.07
  -6  12  -4   32.13   15.43
  -6 -13   5    3.50    2.36
  -6 -13   4   14.16   11.78
  -6 -13   3    4.81    5.61
  -6 -13   2    6.44    6.22
  -6  13   1  -16.29   12.38
  -6 -13   1    7.22    8.31
  -6 -13   0   -1.79    2.04
  -6  13   0    0.01    2.63
  -6  13  -1    7.64    7.19
  -6  13  -2   12.71    9.00
  -6 -14   3    3.18    6.83
  -6  14   0   -6.14    9.10
  -7   0  14  108.98   32.94
  -7   0  13   -8.74    9.39
  -7   0  12   84.13   25.56
  -7   0  11    3.13   11.07
  -7   0  10  128.55   31.92
  -7   0   9    9.58   11.59
  -7   0   8  262.67   42.32
  -7   0   7  -13.57   12.81
  -7   0   6  128.03   29.72
  -7   0   5  -10.26   12.64
  -7   0   4 1412.41  101.20
  -7   0   3   -1.61    2.49
  -7   0   3  -18.39   16.58
  -7   0   2   15.60    7.54
  -7   0   2   23.82   13.30
  -7   0   1    2.20    3.91
  -7   0   1   15.09   12.61
  -7   0   0  351.61   48.63
  -7   0  -1    3.72    6.60
  -7   0  -2    7.10    5.46
  -7   0  -3    7.94    8.82
  -7   0  -4   21.14   11.84
  -7   0  -5  -11.77   13.23
  -7   0  -6   44.94   15.49
  -7   0  -7  -12.78   10.74
  -7   0  -8  -18.93   14.31
  -7   0  -9  -14.47   13.86
  -7   0  -9   -6.88   10.89
  -7   0 -10  -11.53   12.95
  -7   0 -10    7.53    8.42
  -7   0 -11  -23.02   15.79
  -7   0 -11    2.74    6.63
  -7  -1  15   -3.51    6.60
  -7  -1  14   22.36   15.26
  -7   1  13   -6.12   12.61
  -7  -1  13  -19.04   16.40
  -7   1  12   57.32   19.81
  -7  -1  12   53.73   18.75
  -7   1  11    4.98    6.61
  -7  -1  11    6.39    9.89
  -7   1  10  344.44   51.25
  -7  -1  10  348.93   55.20
  -7   1   9   -3.71    5.34
  -7  -1   9    6.41   12.45
  -7   1   8   -0.20    5.24
  -7  -1   8    4.06    2.73
  -7   1   7   75.67   21.16
  -7  -1   7   62.58   20.21
  -7   1   7   63.19   18.42
  -7   1   6  590.25   66.29
  -7  -1   5    9.29    7.99
  -7   1   5  -10.44   19.72
  -7  -1   4   -0.23   11.96
  -7  -1   4    9.99    4.14
  -7   1   4    0.41   10.50
  -7  -1   3  -24.84   22.99
  -7   1   3    0.65    6.66
  -7   1   2  197.74   24.36
  -7  -1   2  238.71   37.41
  -7   1   1   13.06    6.83
  -7  -1   1    8.56    8.44
  -7   1   1   28.51   16.31
  -7   1   0  360.54   42.11
  -7  -1   0  385.24   50.35
  -7   1   0  381.07   49.67
  -7   1  -1    7.25    8.28
  -7   1  -1    3.38    8.81
  -7  -1  -1    2.95    6.98
  -7   1  -2  521.66   52.61
  -7  -1  -2  573.01   61.07
  -7   1  -2  474.22   55.43
  -7   1  -3    0.54   10.30
  -7   1  -3   15.26    8.73
  -7  -1  -3   25.50   13.70
  -7   1  -4   74.45   18.40
  -7   1  -4   83.00   22.71
  -7  -1  -4  100.59   23.83
  -7  -1  -5   59.25   19.45
  -7   1  -5   44.98   15.26
  -7   1  -5   58.33   20.44
  -7  -1  -6   56.52   18.36
  -7   1  -6   37.29   14.48
  -7   1  -6   32.34   13.58
  -7  -1  -7    9.31    7.58
  -7   1  -7   17.71   14.12
  -7   1  -7    6.94    6.49
  -7  -1  -8    1.65    2.25
  -7   1  -8   -5.00    9.89
  -7   1  -8   -6.44    9.10
  -7  -1  -9   -3.21    3.71
  -7   1  -9    3.54    7.58
  -7   1  -9  -10.63    8.08
  -7   1 -10    5.89    7.70
  -7   1 -10    0.07    1.94
  -7   1 -11    3.91    8.41
  -7   1 -11    0.62    7.13
  -7  -2  14   40.96   21.38
  -7  -2  13  -11.25   15.71
  -7  -2  12   61.84   22.21
  -7   2  11    4.97    8.30
  -7  -2  11   27.15   16.68
  -7   2  10   92.43   26.33
  -7  -2  10  109.53   32.17
  -7   2   9    5.67    9.06
  -7  -2   9    0.44    5.26
  -7   2   8  231.40   40.45
  -7   2   8  252.10   38.51
  -7  -2   8  248.38   42.70
  -7  -2   7   56.77   20.55
  -7   2   7   64.01   19.52
  -7   2   7   71.70   20.40
  -7   2   6  -26.45   19.93
  -7  -2   5  141.33   14.17
  -7   2   5  107.71   23.80
  -7  -2   4 1381.13  102.86
  -7   2   4 1616.55  103.62
  -7  -2   3  -10.96   13.54
  -7   2   3    6.72   11.34
  -7  -2   2  -15.97   17.50
  -7   2   2   31.78   15.97
  -7  -2   1    5.25   10.18
  -7   2   1   19.18   12.18
  -7   2   0  323.47   38.03
  -7  -2   0  375.45   50.98
  -7   2   0  386.73   51.99
  -7   2  -1   -2.54    9.67
  -7   2  -1    4.23    4.84
  -7  -2  -1   -2.44    7.90
  -7   2  -2   14.91    9.90
  -7  -2  -2   20.77   11.34
  -7   2  -3   32.31   13.10
  -7   2  -3   36.28   15.04
  -7  -2  -3   56.88   18.88
  -7   2  -4   37.20   16.34
  -7   2  -4   28.73   12.20
  -7  -2  -4   50.87   18.64
  -7   2  -5  107.86   27.66
  -7   2  -5   94.07   22.19
  -7  -2  -5  152.12   29.34
  -7   2  -6   49.18   19.04
  -7   2  -6   50.13   16.97
  -7  -2  -6   49.87   19.99
  -7   2  -7   15.47   10.90
  -7   2  -7   29.52   15.37
  -7  -2  -7   12.70    8.54
  -7   2  -8   20.59   14.20
  -7   2  -8   24.76   14.47
  -7  -2  -8   20.98   10.21
  -7   2  -9   14.86   12.84
  -7   2  -9   18.83   13.44
  -7  -2  -9    5.73    2.47
  -7   2 -10   16.59   12.06
  -7   2 -10   25.04   15.02
  -7  -2 -10   -2.32    3.59
  -7   2 -11   -0.62    3.45
  -7   2 -11   13.65   12.30
  -7   2 -12   11.13   10.19
  -7  -3  13  -16.10   18.71
  -7  -3  12   53.85   15.49
  -7  -3  11    9.57   12.44
  -7   3  10  229.57   38.72
  -7  -3  10  246.33   48.95
  -7   3   9    5.21    8.00
  -7  -3   9   -5.44    1.83
  -7   3   8   89.38   21.75
  -7  -3   8   80.76   24.56
  -7   3   8   73.87   22.72
  -7  -3   7    0.25    7.34
  -7   3   7    6.40    4.23
  -7   3   7    1.29    5.39
  -7   3   6   88.35   20.79
  -7   3   5  125.39   29.13
  -7   3   4   15.69   12.16
  -7  -3   3   34.79   15.34
  -7   3   3   62.93   22.41
  -7  -3   2  258.80   41.92
  -7   3   2  362.64   49.55
  -7   3   1   18.19    8.44
  -7  -3   1    8.24    3.29
  -7   3   0   65.27   18.52
  -7  -3   0   64.14   14.15
  -7   3  -1   23.67    7.63
  -7  -3  -1   11.63    8.96
  -7   3  -1   21.17    7.09
  -7   3  -2  197.56   33.19
  -7  -3  -2  202.75   36.09
  -7   3  -2  174.61   31.19
  -7   3  -3   48.62   17.98
  -7  -3  -3   86.93   23.12
  -7   3  -3   61.27   19.15
  -7   3  -4  196.22   35.82
  -7  -3  -4  259.88   38.84
  -7   3  -4  186.57   31.70
  -7   3  -5   -2.75    3.89
  -7  -3  -5    8.50   10.64
  -7   3  -5   13.60   11.37
  -7   3  -6   24.18   14.31
  -7  -3  -6   59.82   19.66
  -7   3  -6   51.55   18.37
  -7   3  -7   14.26   13.58
  -7  -3  -7   14.88   11.58
  -7   3  -7   30.76   15.43
  -7   3  -8    4.09    5.79
  -7  -3  -8   15.22   13.67
  -7   3  -9    3.56    4.62
  -7  -3  -9   22.87   14.33
  -7   3 -10    1.57    5.77
  -7   3 -10   55.01   20.42
  -7   3 -11   17.70   14.94
  -7   3 -11   34.46   18.36
  -7   3 -12   31.91   17.22
  -7  -4  13  -11.06   19.07
  -7  -4  12   16.80    5.89
  -7  -4  11   -1.91    7.37
  -7  -4  10  105.20   30.68
  -7  -4   9    5.00    2.88
  -7   4   9    4.38    5.58
  -7   4   8  227.48   34.49
  -7  -4   8  214.58   41.54
  -7   4   8  207.83   38.19
  -7  -4   7   20.81   12.27
  -7   4   7   31.45   11.77
  -7   4   7    3.21   16.91
  -7   4   6   32.24    9.96
  -7   4   5   14.06   14.76
  -7   4   4  237.69   39.89
  -7   4   3   22.37   13.01
  -7  -4   2  128.70   29.99
  -7   4   2  164.85   33.60
  -7  -4   1  106.16   26.16
  -7   4   1  106.22   23.96
  -7  -4   0   83.99   23.09
  -7   4   0   65.23   17.16
  -7  -4  -1   -4.69    7.67
  -7   4  -1    5.06    6.89
  -7  -4  -2   61.79   18.60
  -7   4  -2   89.14   23.47
  -7  -4  -3   49.18   15.44
  -7   4  -3   81.25   23.79
  -7  -4  -4   -8.37   10.16
  -7   4  -4   -9.32    9.84
  -7   4  -4   21.59   14.83
  -7   4  -5   35.06   13.03
  -7  -4  -5   34.29   13.87
  -7   4  -6   99.44   27.04
  -7  -4  -6  117.27   27.41
  -7   4  -6  151.27   31.11
  -7   4  -7   -6.00   11.41
  -7  -4  -7   -1.09    1.97
  -7   4  -8    6.45    6.21
  -7  -4  -8   13.67    9.40
  -7   4  -9  -18.73   14.10
  -7   4  -9   86.18   25.90
  -7   4 -10   18.85   10.97
  -7   4 -10  104.83   30.04
  -7   4 -11   44.41   22.03
  -7   4 -12   59.55   24.28
  -7  -5  12   29.89   13.55
  -7  -5  11   15.72   16.28
  -7  -5  10   94.76   30.96
  -7  -5   9   -3.07    6.03
  -7   5   9   -0.12    6.59
  -7  -5   8   -0.11    3.11
  -7   5   8    4.88    6.43
  -7  -5   7   47.86   18.00
  -7   5   7   61.62   16.00
  -7   5   7   48.41    9.30
  -7  -5   6  301.18   47.95
  -7   5   6  340.76   48.48
  -7   5   5  189.55   36.91
  -7   5   4   14.52   14.25
  -7   5   3    0.28    5.05
  -7   5   2  396.85   50.77
  -7   5   1  -12.90   13.12
  -7  -5   0    3.00    8.49
  -7   5   0    6.13    7.78
  -7  -5  -1    7.37    5.78
  -7   5  -1   40.09   17.32
  -7  -5  -2  197.71   35.87
  -7   5  -2  209.69   34.35
  -7  -5  -3   69.46   20.56
  -7   5  -3  104.28   26.20
  -7  -5  -4   -4.47    8.30
  -7   5  -4   48.48   21.09
  -7  -5  -5   -0.89    7.62
  -7   5  -5   34.61   17.31
  -7  -5  -6  -14.18   13.59
  -7   5  -6   46.79   20.72
  -7   5  -7   25.28   14.71
  -7  -5  -7   -5.14   12.24
  -7   5  -8  -12.06    6.31
  -7   5  -9  -20.36    7.26
  -7   5 -10    4.55   17.06
  -7   5 -11   46.26   14.75
  -7  -6  11   65.17   27.43
  -7  -6  10   36.75   20.50
  -7  -6   9    6.39   10.91
  -7   6   8  130.74   28.84
  -7  -6   8  194.64   41.71
  -7  -6   7   -3.68    8.36
  -7   6   7   -2.03    7.74
  -7  -6   6    4.20    8.47
  -7   6   6   36.42   19.26
  -7   6   5   11.57   14.41
  -7   6   4  140.45   31.16
  -7   6   3   10.67    1.61
  -7   6   2   40.63   12.47
  -7   6   1    4.69    4.38
  -7   6   0  179.86   31.60
  -7   6  -1   41.05   18.37
  -7   6  -2  324.22   44.09
  -7  -6  -3   -0.06    8.09
  -7   6  -3   73.66   24.47
  -7   6  -4  112.10   24.79
  -7  -6  -4   78.13   21.63
  -7   6  -5  -22.45   15.81
  -7  -6  -5  -19.48   14.73
  -7   6  -6    0.69    8.23
  -7  -6  -6   13.86    3.64
  -7   6  -7   -0.71   10.24
  -7  -6  -7   -6.91    9.92
  -7   6  -8   -0.82    7.75
  -7   6  -9   10.47    4.41
  -7   6 -10   -7.63   14.32
  -7  -7  10   28.59   16.26
  -7  -7   9    6.12    9.28
  -7  -7   8   25.36   16.39
  -7  -7   7    5.16    5.34
  -7   7   7    7.76    7.11
  -7  -7   6  189.95   38.67
  -7   7   6  293.57   46.28
  -7  -7   5    2.79    2.10
  -7   7   5   15.31   11.72
  -7   7   4    3.16    7.15
  -7   7   3  -18.10   14.55
  -7   7   2  217.26   36.56
  -7   7   1   12.92   11.34
  -7   7   0   69.45   22.16
  -7   7  -1   36.38   21.80
  -7   7  -2   44.05   21.98
  -7   7  -3    2.96   11.93
  -7   7  -4  -15.12   11.79
  -7   7  -5  -12.56   10.75
  -7   7  -6    5.61    3.10
  -7   7  -7  -17.74   11.19
  -7   7  -8    5.59    4.03
  -7   7  -9   -7.35    9.32
  -7  -8  10   19.75   19.41
  -7  -8   9  -10.88    8.29
  -7  -8   8  114.10   33.57
  -7  -8   7   -2.57    6.98
  -7  -8   6    3.66    9.89
  -7   8   6   16.78   16.24
  -7   8   5   -3.75    4.73
  -7  -8   5   -0.95    2.22
  -7   8   4   91.95   23.73
  -7  -8   4   78.66   26.72
  -7   8   3   -4.18    9.67
  -7   8   2   11.36   11.91
  -7   8   1   24.11   15.35
  -7   8   0   64.24   21.37
  -7   8  -1   61.69   22.35
  -7   8  -2   70.92   22.31
  -7   8  -3  -13.92   13.15
  -7   8  -4   20.38    8.49
  -7   8  -5   -6.24    7.78
  -7   8  -6   -4.49    5.19
  -7   8  -7   -6.68    8.67
  -7   8  -8    5.05    4.95
  -7  -9   8    8.58    8.75
  -7  -9   7   17.82   13.39
  -7  -9   6   77.91   27.11
  -7   9   5    3.79    3.60
  -7  -9   5    7.39    5.41
  -7  -9   4    6.17    8.10
  -7   9   4  -30.33   19.27
  -7   9   3   13.29    7.05
  -7   9   2  136.31   28.78
  -7   9   1   25.71   16.71
  -7   9   0   49.49   20.01
  -7   9  -1   47.43   20.71
  -7   9  -2   31.11   10.94
  -7   9  -3  -16.54   11.17
  -7   9  -4   -2.64    9.14
  -7   9  -5    3.99    7.85
  -7   9  -6    6.11    9.33
  -7   9  -7    3.77    4.76
  -7 -10   7    6.85    7.13
  -7 -10   6   17.51   13.29
  -7 -10   5   -3.04    4.10
  -7 -10   4    4.09    3.70
  -7  10   4   -4.40   12.81
  -7 -10   3   13.26   11.14
  -7  10   3   15.13   10.82
  -7  10   2   19.26   13.68
  -7  10   1   28.19   17.15
  -7  10   0   67.58   23.76
  -7  10  -1  -11.36    7.27
  -7  10  -2   -8.01   12.39
  -7  10  -3   -5.59    8.49
  -7  10  -4    4.52    3.88
  -7  10  -5   -5.58    6.78
  -7 -11   6   18.15   14.82
  -7 -11   5   11.80    9.46
  -7 -11   4    5.21    6.89
  -7 -11   3   10.52    7.66
  -7  11   3   25.98   15.19
  -7 -11   2   21.02   12.84
  -7  11   2   55.63   20.74
  -7  11   1   42.07   19.49
  -7  11   0   76.95   24.32
  -7  11  -1  -23.85   14.66
  -7  11  -2  -20.92   12.73
  -7  11  -3   -0.95    4.79
  -7  11  -4   -0.50    4.14
  -7 -12   4    3.80    6.25
  -7 -12   3    5.18    7.53
  -7 -12   2    0.88    2.03
  -7  12   2   31.93   16.94
  -7 -12   1   15.50   12.99
  -7  12   1   45.73   20.76
  -7  12   0   78.97   26.72
  -7 -12   0   37.88   19.66
  -7  12  -1  -12.45   11.54
  -7  12  -2   -2.93    6.91
  -7 -13   2   13.80   11.86
  -7 -13   1    2.61    4.70
  -7  13   1   69.83   24.03
  -7 -13   0    0.70    6.02
  -7  13   0   51.07   22.74
  -8   0  13  -28.18   21.36
  -8   0  12  212.80   47.41
  -8   0  11   10.55   14.37
  -8   0  10   32.52   17.80
  -8   0   9    3.97   12.26
  -8   0   8  206.00   43.81
  -8   0   7  -28.74   20.85
  -8   0   6  -11.33   19.19
  -8   0   5   -5.50   14.76
  -8   0   4  -20.45   20.36
  -8   0   3   -1.31    3.79
  -8   0   3  -24.30   20.73
  -8   0   2 1108.04   64.93
  -8   0   2 1168.56   93.29
  -8   0   1    3.48    5.30
  -8   0   1    7.32   14.56
  -8   0   0  104.12   22.31
  -8   0   0  157.29   34.76
  -8   0  -1    3.54    5.27
  -8   0  -1   15.61   12.94
  -8   0  -2   45.98   14.89
  -8   0  -2   67.70   23.14
  -8   0  -3   -3.15    5.06
  -8   0  -3   -3.65    2.90
  -8   0  -4   68.45   21.35
  -8   0  -5    1.58    2.83
  -8   0  -5    2.25    7.51
  -8   0  -6   27.98   14.37
  -8   0  -6   32.93   16.44
  -8   0  -7    6.12    7.12
  -8   0  -7   -4.75   10.27
  -8   0  -8   -0.90    7.00
  -8   0  -8    3.86    2.52
  -8   0  -9    0.00    8.68
  -8   0  -9   -0.53    7.95
  -8   0 -10    4.19    7.00
  -8   0 -10    5.61    7.81
  -8  -1  14   20.87   12.73
  -8  -1  13  -10.93   14.80
  -8   1  12   -7.73   11.39
  -8  -1  12   39.44   24.25
  -8   1  11   17.72   15.65
  -8  -1  11   19.75   21.66
  -8   1  10  185.05   42.42
  -8  -1  10  170.11   41.90
  -8   1   9   13.32    6.47
  -8  -1   9   -0.36    9.26
  -8  -1   8   83.96   26.18
  -8   1   8   80.90   24.04
  -8   1   7  -18.51   21.90
  -8  -1   6  180.56   37.49
  -8   1   6  190.03   39.98
  -8  -1   5  -14.84   15.96
  -8   1   5  -24.48   22.26
  -8  -1   4   48.05   17.53
  -8   1   4   51.32   15.53
  -8  -1   3   18.76    8.78
  -8   1   3    7.84    3.15
  -8  -1   2    5.54    1.73
  -8  -1   2    6.66    4.46
  -8   1   2    1.89    6.77
  -8   1   2   19.54   16.39
  -8   1   1    5.18    5.76
  -8  -1   1   -2.28    4.46
  -8   1   1   14.46   11.13
  -8   1   0  126.67   25.57
  -8  -1   0  149.43   33.43
  -8   1   0  140.84   31.78
  -8   1  -1    2.94    5.98
  -8  -1  -1   12.78   13.16
  -8   1  -1   -0.10    6.96
  -8   1  -2   42.24   15.18
  -8   1  -2   51.49   17.37
  -8  -1  -2   61.41   22.09
  -8   1  -3   -0.51    5.14
  -8   1  -3    1.83    3.85
  -8   1  -4  134.81   29.00
  -8   1  -4  145.36   30.79
  -8  -1  -4  177.83   34.44
  -8   1  -5   48.30   17.12
  -8   1  -5   63.68   21.26
  -8  -1  -5   64.57   23.17
  -8   1  -6   29.84   11.46
  -8   1  -6   59.66   21.92
  -8  -1  -6   58.11   20.02
  -8   1  -7  -15.44   14.25
  -8   1  -7    1.49    4.84
  -8  -1  -7   -8.34   11.48
  -8   1  -8   11.28    8.63
  -8  -1  -8    2.50    2.28
  -8   1  -9    4.67    6.07
  -8  -1  -9   -6.44    9.62
  -8   1 -10  -27.90   17.25
  -8  -1 -10  -15.45   14.50
  -8   1 -10    4.05    6.40
  -8  -1 -10   -9.21   10.85
  -8   1 -11  -30.05   18.49
  -8  -2  13  -13.41   17.42
  -8  -2  12  166.09   45.03
  -8   2  11   11.17   16.43
  -8  -2  11   12.11   18.55
  -8   2  10   21.89   18.35
  -8  -2  10    1.98    4.39
  -8   2   9    6.62    7.05
  -8  -2   9    0.14    5.97
  -8   2   8   94.89   24.73
  -8  -2   8  117.47   31.98
  -8   2   8  127.34   32.33
  -8   2   7    3.94    9.31
  -8   2   6  146.00   32.06
  -8  -2   5  -19.33   19.40
  -8   2   5  -23.72   20.29
  -8  -2   4  214.55   40.18
  -8   2   4  252.22   42.75
  -8  -2   3   17.79    6.87
  -8   2   3   36.53   17.66
  -8  -2   2  399.17   55.68
  -8   2   2  465.47   58.45
  -8  -2   1  -23.82   18.94
  -8   2   1   -5.42    8.22
  -8   2   0   33.35   11.99
  -8  -2   0   36.25   12.14
  -8   2   0   34.25   14.84
  -8   2  -1    9.03    8.06
  -8   2  -1    7.34    7.82
  -8  -2  -1   15.40    9.67
  -8   2  -2   -6.74   10.75
  -8   2  -2   10.64    7.85
  -8  -2  -2   14.62   13.00
  -8   2  -3    0.64    5.40
  -8  -2  -3    9.06    9.14
  -8   2  -4  -12.10   13.81
  -8   2  -4    1.65    6.45
  -8  -2  -4   14.06   11.25
  -8   2  -5  -13.53   11.59
  -8   2  -5    6.12    8.11
  -8  -2  -5   17.71   12.77
  -8   2  -6   -9.48   12.12
  -8   2  -6   14.17   11.60
  -8  -2  -6   11.99   13.07
  -8   2  -7    6.72   10.07
  -8   2  -7  -12.64   12.95
  -8  -2  -7    9.37   12.74
  -8   2  -8   12.36   13.46
  -8   2  -8    3.97    6.16
  -8  -2  -8   26.08   12.96
  -8   2  -9    9.21   10.70
  -8   2  -9    0.66    6.02
  -8  -2  -9   13.91   12.51
  -8   2 -10   10.78    9.63
  -8   2 -10   -3.99    5.88
  -8   2 -11  -10.67   13.90
  -8  -3  12   14.96   18.78
  -8  -3  11    8.68   16.35
  -8  -3  10  111.10   36.25
  -8   3   9    4.71    6.16
  -8  -3   9   -0.11    3.48
  -8  -3   8   97.00   29.70
  -8   3   8  111.46   29.12
  -8   3   8   97.81   25.58
  -8  -3   7   28.83   14.94
  -8   3   7   29.20   13.75
  -8   3   6   25.39    7.82
  -8   3   5   45.25   17.91
  -8  -3   4  108.19   28.92
  -8   3   4  211.06   39.26
  -8  -3   3   63.32   14.48
  -8   3   3  126.86   30.79
  -8  -3   2   29.27    2.80
  -8   3   2   61.87   22.27
  -8   3   1   22.08   12.47
  -8  -3   1    9.55    5.51
  -8  -3   0  182.55   35.60
  -8   3   0  187.51   38.20
  -8   3  -1  -10.35   12.47
  -8  -3  -1  -10.62   16.66
  -8   3  -2  -20.92   16.17
  -8   3  -2    1.92    2.74
  -8  -3  -2   -7.79   10.76
  -8   3  -3    0.13    7.67
  -8   3  -3    7.53    5.09
  -8  -3  -3    6.75    2.72
  -8   3  -4  349.07   49.99
  -8  -3  -4  409.49   54.54
  -8   3  -4  307.80   43.85
  -8   3  -5   19.25   11.39
  -8   3  -5   12.89    8.70
  -8  -3  -5   26.40   14.42
  -8   3  -6    0.68    4.55
  -8   3  -6    2.06    3.50
  -8  -3  -6    9.62    8.68
  -8   3  -7    4.31    3.69
  -8   3  -7   -0.78    3.21
  -8  -3  -7    8.96   12.09
  -8   3  -8    6.04    5.29
  -8   3  -8    6.30    9.49
  -8  -3  -8   12.12   11.35
  -8   3  -9   11.67   13.82
  -8   3  -9   17.09   11.63
  -8   3 -10    6.50   14.44
  -8   3 -10    7.37    8.66
  -8   3 -11    7.33    6.88
  -8  -4  12   40.32   25.00
  -8  -4  11   14.79   18.81
  -8  -4  10   26.30   17.64
  -8  -4   9    7.26    8.71
  -8   4   9   -6.43   13.91
  -8   4   8   61.61   19.59
  -8  -4   8   60.77   23.44
  -8   4   8   72.43   22.44
  -8  -4   7   -9.33    5.62
  -8   4   7  -39.19   23.80
  -8   4   6  318.64   48.00
  -8   4   5  134.16   31.74
  -8   4   4  246.75   42.89
  -8   4   3  115.87   28.95
  -8  -4   2  151.84   33.86
  -8   4   2  184.46   36.62
  -8   4   1    3.14    2.02
  -8  -4   1  -21.23   19.10
  -8   4   0  -18.32   14.44
  -8  -4   0   -8.54   13.89
  -8   4  -1  -11.63   14.20
  -8  -4  -1  -11.15   12.90
  -8  -4  -2   13.13    6.60
  -8   4  -2   17.62    8.25
  -8  -4  -3  -17.97   15.53
  -8   4  -3    2.25    7.33
  -8  -4  -4    1.23    6.93
  -8   4  -4    2.73    4.94
  -8   4  -4   18.34   11.71
  -8   4  -5   -4.80   11.01
  -8  -4  -5   -1.88   10.24
  -8   4  -5   10.16    9.66
  -8   4  -6   17.45    9.62
  -8  -4  -6   14.05   10.17
  -8   4  -6   27.87   13.71
  -8   4  -7   -7.49   10.72
  -8  -4  -7   -2.97    6.94
  -8   4  -7   12.87   14.60
  -8   4  -8  -14.64   13.85
  -8  -4  -8    1.56    1.49
  -8   4  -9   -0.71    5.93
  -8   4  -9   30.29   19.74
  -8   4 -10   39.01   20.55
  -8  -5  11   19.81   17.29
  -8  -5  10  118.44   38.81
  -8  -5   9    3.28    5.04
  -8  -5   8   32.63   18.38
  -8   5   8   35.86   15.67
  -8  -5   7    3.70    6.27
  -8   5   7   -8.93   14.74
  -8   5   6  161.36   35.11
  -8   5   5   20.74   13.73
  -8   5   4  146.27   33.28
  -8   5   3   75.22   23.09
  -8   5   2  110.97   28.31
  -8   5   1   -8.84   14.65
  -8  -5   0  103.13   27.51
  -8   5   0   89.13   22.70
  -8  -5  -1   -6.19   12.94
  -8   5  -1   -8.19   12.46
  -8  -5  -2    8.39    8.23
  -8   5  -2   18.04   11.31
  -8  -5  -3   -6.09   12.09
  -8   5  -3   13.05   10.61
  -8  -5  -4   15.96    7.82
  -8   5  -4   34.21   16.95
  -8  -5  -5  -10.64    9.52
  -8   5  -5   25.17   16.41
  -8  -5  -6   -5.20    7.93
  -8   5  -6   52.60   20.80
  -8  -5  -7  -16.66   13.46
  -8   5  -7   16.33   15.10
  -8   5  -8   58.72   23.61
  -8   5  -9   61.88   25.58
  -8  -6  10   17.61   16.75
  -8  -6   9   29.49   19.25
  -8  -6   8   74.55   26.39
  -8   6   8   34.83    4.76
  -8  -6   7   -7.30   10.55
  -8   6   7   -8.16    8.28
  -8  -6   6   63.15   24.96
  -8   6   6  112.57   30.65
  -8   6   5   19.76   14.42
  -8   6   4   12.80   11.33
  -8   6   3   -2.20    5.44
  -8   6   2   10.92    7.10
  -8   6   1   -0.46    8.81
  -8   6   0   -8.06   11.05
  -8   6  -1   10.54   11.34
  -8  -6  -2   59.07   16.74
  -8   6  -2  110.07   27.52
  -8  -6  -3  -12.26   14.22
  -8   6  -3   27.90   16.00
  -8  -6  -4  -28.89   19.14
  -8   6  -4   29.83   19.41
  -8  -6  -5  -16.69   14.24
  -8   6  -5   40.13   22.46
  -8  -6  -6   -1.64   10.03
  -8   6  -6   71.57   26.08
  -8   6  -7   57.89   23.00
  -8   6  -8   77.13   26.27
  -8  -7   9    3.86   13.75
  -8  -7   8    4.43    3.82
  -8  -7   7   -4.04    6.72
  -8   7   7    6.45   11.76
  -8  -7   6   38.64   18.98
  -8   7   6   80.02   27.15
  -8   7   5   24.44   17.72
  -8   7   4   52.00   20.19
  -8   7   3  -11.54   13.19
  -8   7   2    6.18    8.67
  -8   7   1   -1.82    4.82
  -8   7   0  104.88   26.00
  -8   7  -1   29.07   15.80
  -8   7  -2   55.59   20.86
  -8   7  -3   32.14   17.46
  -8   7  -4   71.34   26.05
  -8   7  -5   66.53   26.72
  -8   7  -6   82.15   27.25
  -8   7  -7   51.21   21.75
  -8  -8   8   62.07   25.45
  -8  -8   7   -6.98   10.70
  -8  -8   6   25.13   15.88
  -8   8   6   55.00   24.25
  -8  -8   5    3.76    3.05
  -8   8   5    9.56   11.37
  -8   8   4    7.25    5.20
  -8   8   3  -21.87   17.21
  -8   8   2   -8.47   10.86
  -8   8   1   11.62   11.23
  -8   8   0    7.10    8.41
  -8   8  -1   23.34   14.89
  -8   8  -2   53.82   21.21
  -8   8  -3   44.33   20.52
  -8   8  -4   47.39   22.06
  -8   8  -5   58.60   24.17
  -8   8  -6   56.04   24.26
  -8  -9   7    8.49    6.07
  -8  -9   6    0.17    2.02
  -8  -9   5    7.23    6.78
  -8   9   5    2.81    6.76
  -8   9   4   14.44    5.19
  -8  -9   4   20.56   10.06
  -8   9   3  -22.77   16.75
  -8   9   2   -2.51    8.69
  -8   9   1    1.39    3.62
  -8   9   0   51.21   19.86
  -8   9  -1   42.80   18.68
  -8   9  -2   81.67   26.16
  -8   9  -3   47.49   20.42
  -8   9  -4   65.09   27.03
  -8   9  -5   53.54   18.77
  -8 -10   5   -6.49   10.76
  -8  10   4   -1.45    9.90
  -8 -10   4   21.05   17.38
  -8 -10   3   11.54   11.33
  -8  10   3  -15.41   15.30
  -8  10   2   20.41   11.65
  -8  10   1   11.49   11.52
  -8  10   0   45.54   18.56
  -8  10  -1   50.57   20.68
  -8  10  -2  121.54   30.37
  -8  10  -3   67.33   23.82
  -8 -11   3    8.24    9.52
  -8  11   3  -14.44   14.09
  -8 -11   2    2.07    7.57
  -8  11   2   -2.52    4.19
  -8  11   1   17.26   13.02
  -8  11   0   30.65   17.28
  -8  11  -1   62.43   24.01
  -8  12   2   -1.04    4.28
  -8  12   1   12.30   12.00
  -9   0  12   37.28   27.16
  -9   0  11   18.94   22.14
  -9   0  10  110.22   35.82
  -9   0   9  -19.25   20.22
  -9   0   8   -9.07   17.35
  -9   0   7  -30.69   28.14
  -9   0   6   90.42   25.44
  -9   0   5  -18.60   19.60
  -9   0   4   98.17   24.47
  -9   0   3  -15.51   19.77
  -9   0   2  301.02   51.74
  -9   0   1    1.41    4.72
  -9   0   1    8.32   12.34
  -9   0   0  133.43   26.24
  -9   0   0  171.95   36.05
  -9   0  -1    7.23    6.66
  -9   0  -1   17.28   14.89
  -9   0  -2   54.28   16.86
  -9   0  -2   67.67   23.04
  -9   0  -3   -3.65    8.58
  -9   0  -3    4.48   11.47
  -9   0  -4   -7.71    7.90
  -9   0  -4  -10.86   10.78
  -9   0  -5   -3.47    9.06
  -9   0  -5   -1.18    4.30
  -9   0  -6   33.25   16.75
  -9   0  -6   46.26   20.25
  -9   0  -7   -4.65    8.52
  -9   0  -7   -8.24   11.13
  -9   0  -8  -20.50   12.41
  -9   0  -8    8.31    9.40
  -9   0  -9  -20.21   13.82
  -9   0  -9    1.98    8.25
  -9   0 -10   -5.91    2.06
  -9  -1  13  -11.88   19.03
  -9  -1  12   86.52   35.22
  -9   1  11    7.18   14.41
  -9  -1  11    9.56   16.32
  -9   1  10    5.09    8.06
  -9  -1  10   -5.36    2.95
  -9   1   9   -3.82    5.22
  -9  -1   9   11.68    9.36
  -9  -1   8  151.60   40.00
  -9   1   8  153.56   40.00
  -9   1   7  -23.23   21.86
  -9  -1   6  -21.63   24.66
  -9   1   6   16.02    8.42
  -9  -1   5  -22.90   22.05
  -9   1   5  -23.56   21.39
  -9  -1   4  302.10   51.80
  -9   1   4  333.06   53.53
  -9  -1   3  -17.55   18.31
  -9   1   3   -4.40    6.56
  -9  -1   2  -21.19   21.34
  -9   1   2    6.48   11.75
  -9  -1   1    1.58    2.84
  -9   1   1    0.68    4.89
  -9  -1   1   -5.56    9.08
  -9   1   1    9.74   12.64
  -9   1   0   11.10    8.18
  -9  -1   0   18.67   10.15
  -9   1   0   12.01   10.49
  -9   1  -1    0.54    5.28
  -9  -1  -1    4.59    9.33
  -9   1  -1   12.98   10.42
  -9   1  -2   37.66   14.64
  -9  -1  -2   41.75   19.89
  -9   1  -2   43.68   18.98
  -9   1  -3   16.98   13.18
  -9  -1  -3   33.12   17.61
  -9   1  -3   19.27    8.76
  -9   1  -4   -4.88    8.06
  -9   1  -4   11.05   11.11
  -9  -1  -4   16.86   14.13
  -9   1  -5   10.55   12.43
  -9   1  -5   11.72    8.33
  -9  -1  -5   20.11   14.79
  -9   1  -6   82.01   26.74
  -9   1  -6   60.77   21.93
  -9  -1  -6   80.58   26.66
  -9   1  -7    1.19    7.21
  -9   1  -7   10.65   10.90
  -9  -1  -7   10.04    8.41
  -9   1  -8   -2.80    7.06
  -9  -1  -8   -9.59   14.02
  -9   1  -8   -7.28    3.90
  -9  -1  -8    6.65    9.10
  -9   1  -9   -2.03    7.46
  -9  -1  -9    2.31    7.00
  -9   1  -9    9.18   13.41
  -9  -1  -9    4.54    5.72
  -9   1 -10  -10.30   11.11
  -9  -2  12   30.26   24.24
  -9  -2  11   22.01   19.82
  -9  -2  10  100.49   35.50
  -9   2   9   -2.57    7.28
  -9  -2   9   -6.36   11.31
  -9  -2   8    2.07    5.36
  -9   2   8    4.71    9.71
  -9   2   7  -17.14   17.76
  -9   2   6   81.93   21.94
  -9  -2   5  -47.06   29.41
  -9   2   5   -6.48   14.12
  -9  -2   4  -69.04   26.51
  -9   2   4   -3.73    2.14
  -9  -2   3   40.53   13.25
  -9   2   3   80.75   27.41
  -9  -2   2  103.89   29.03
  -9   2   2  123.15   31.88
  -9  -2   1   18.11    3.03
  -9   2   1   52.04   21.13
  -9  -2   0   87.33   25.96
  -9   2   0   79.77   20.91
  -9   2   0   94.45   27.71
  -9   2  -1    5.94    5.56
  -9  -2  -1    6.50    4.37
  -9   2  -1    9.92    8.20
  -9   2  -2    6.97    7.09
  -9   2  -2   31.69   13.87
  -9  -2  -2   37.81   18.59
  -9   2  -3   -1.65    7.17
  -9   2  -3    2.83    5.80
  -9  -2  -3    1.35    5.76
  -9   2  -4  -20.12   14.22
  -9   2  -4   12.15   10.32
  -9  -2  -4    7.56    9.14
  -9   2  -5  -14.46   16.16
  -9   2  -5    7.40    8.35
  -9  -2  -5   10.34   12.22
  -9   2  -6    1.71    7.84
  -9   2  -6    6.07    7.73
  -9  -2  -6   22.61   15.31
  -9   2  -7   -2.97   10.97
  -9   2  -7   15.67   12.27
  -9  -2  -7   24.27   15.94
  -9   2  -8  -13.14   16.35
  -9   2  -8   24.94   15.87
  -9  -2  -8   33.06   15.78
  -9   2  -9    2.85    4.07
  -9  -2  -9   24.80   14.89
  -9   2 -10  -40.14   22.19
  -9  -3  11    3.87    5.98
  -9  -3  10    5.41    9.04
  -9  -3   9   -4.80    9.89
  -9  -3   8  155.15   40.78
  -9   3   8  148.32   39.69
  -9   3   8  140.61   35.18
  -9   3   7    9.34   10.15
  -9   3   6  -33.85   22.79
  -9   3   5  -10.71   10.86
  -9  -3   4    9.73   24.39
  -9   3   4   80.43   25.25
  -9  -3   3  -39.62   28.98
  -9   3   3   15.06   14.64
  -9  -3   2   43.49   18.60
  -9   3   2   90.91   28.97
  -9  -3   1   -0.39    1.81
  -9   3   1   12.70   13.54
  -9  -3   0   -7.26   13.98
  -9   3   0    9.42    4.48
  -9   3  -1   14.82   15.69
  -9  -3  -1  -18.22   19.91
  -9   3  -2   23.05   11.11
  -9  -3  -2    9.67    2.00
  -9   3  -2   30.07   13.64
  -9   3  -3  -14.67   15.12
  -9   3  -3    9.58    7.19
  -9  -3  -3   -2.46    7.82
  -9   3  -4   -1.67   11.38
  -9   3  -4    9.22    6.31
  -9  -3  -4   13.96    8.60
  -9   3  -5    5.83    6.82
  -9  -3  -5    3.81    4.76
  -9   3  -6    5.16   10.85
  -9  -3  -6   -1.24    7.73
  -9   3  -7  -19.13   15.03
  -9   3  -7    0.83    4.52
  -9  -3  -7    6.29   10.29
  -9   3  -8    0.14    2.77
  -9  -3  -8    9.33    8.63
  -9   3  -9  -22.73   19.42
  -9  -4  10   56.77   27.36
  -9  -4   9   17.18   10.42
  -9  -4   8    7.40    3.75
  -9   4   8  -21.18   20.36
  -9  -4   7  -15.34   15.61
  -9   4   7  -18.81   19.76
  -9   4   6   57.25   18.65
  -9   4   5   25.89   16.69
  -9   4   4   38.35   18.44
  -9   4   3   17.01   14.42
  -9  -4   2   74.77   22.32
  -9   4   2  104.12   31.81
  -9  -4   1  -41.89   25.39
  -9   4   1   -3.40    9.24
  -9   4   0   44.80   18.20
  -9  -4   0   24.44    7.15
  -9   4  -1   -7.50   14.30
  -9  -4  -1    1.30    2.43
  -9   4  -2   27.09    9.83
  -9  -4  -2   57.50   22.44
  -9   4  -3  -14.52   15.10
  -9  -4  -3  -17.63   16.12
  -9   4  -4  -15.43   11.64
  -9  -4  -4  -14.98   18.90
  -9   4  -5   -8.01   10.93
  -9  -4  -5   -6.68   13.94
  -9   4  -5    8.63    7.85
  -9   4  -6   -1.06    1.68
  -9   4  -6    7.67    7.65
  -9   4  -7   -0.09    5.79
  -9  -4  -7   -5.70    5.93
  -9   4  -7   -9.52   11.64
  -9   4  -8    5.20    9.66
  -9   4  -8   -8.54    8.72
  -9  -5   9  -14.44   17.21
  -9  -5   8   58.72   25.26
  -9   5   8   85.40   28.68
  -9  -5   7  -12.09   14.80
  -9   5   7   -9.32   14.29
  -9   5   6    5.54    8.26
  -9   5   5   29.43   17.67
  -9   5   4   74.20   23.98
  -9   5   3   26.37   13.98
  -9   5   2    1.06    5.26
  -9   5   1    4.37    5.30
  -9  -5   1  -20.30   21.77
  -9   5   0    1.63    6.67
  -9  -5   0  -11.54   16.91
  -9  -5  -1  -18.82   20.16
  -9   5  -1  -32.57   19.47
  -9  -5  -2    3.09   10.31
  -9   5  -2    1.65    9.06
  -9  -5  -3   -3.73    5.44
  -9   5  -3   -8.28    9.92
  -9  -5  -4  -12.91   14.14
  -9   5  -4    3.09    3.04
  -9  -5  -5  -10.47   10.78
  -9   5  -5    1.13    3.66
  -9  -5  -6    8.00    7.53
  -9   5  -6   19.03   12.40
  -9  -5  -7    0.23    3.13
  -9   5  -7    6.27   10.07
  -9  -6   8   -1.53    7.62
  -9  -6   7    4.43    9.66
  -9   6   7  -11.01   13.73
  -9  -6   6   59.10   23.98
  -9   6   6   77.39   26.00
  -9   6   5   12.84   12.54
  -9   6   4   42.20   20.66
  -9   6   3    0.90    2.80
  -9   6   2   27.07   16.76
  -9   6   1  -11.61   16.70
  -9   6   0  -24.85   18.42
  -9   6  -1  -22.35   18.85
  -9  -6  -2  -27.30   20.95
  -9   6  -2   -5.76   10.89
  -9  -6  -3  -23.13   17.41
  -9   6  -3    2.79    4.74
  -9  -6  -4  -25.22   19.65
  -9   6  -4   15.67   10.82
  -9  -6  -5  -25.27   17.94
  -9   6  -5    9.87   11.49
  -9  -6  -6   -9.46   16.58
  -9   6  -6   26.79   17.46
  -9  -7   7   -9.55   10.90
  -9   7   7   -6.63    8.81
  -9  -7   6    2.71    9.16
  -9   7   6   33.12   18.91
  -9   7   5   33.76   18.68
  -9   7   4   48.76   19.92
  -9   7   3    7.35    7.95
  -9   7   2    4.02    6.41
  -9   7   1    6.27    2.41
  -9   7   0   37.17   15.56
  -9   7  -1  -13.11   16.29
  -9   7  -2   12.46    9.97
  -9   7  -3    6.71   13.39
  -9   7  -4   26.32   15.62
  -9   7  -5   40.53   19.96
  -9  -8   6   61.17   26.09
  -9   8   6   99.16   29.05
  -9  -8   5    6.32    9.37
  -9   8   5    5.22   10.87
  -9   8   4  -10.80   10.72
  -9   8   3    7.04   10.25
  -9   8   2   -9.09   12.69
  -9   8   1   -5.08   14.20
  -9   8   0  -11.22   13.00
  -9   8  -1   20.33   13.34
  -9   8  -2    2.00   10.38
  -9   8  -3   25.91   16.46
  -9   9   5    9.15   10.89
  -9   9   4    6.09    8.22
  -9  -9   4    8.64   10.44
  -9   9   3    3.25    2.44
  -9   9   2  -19.79   16.19
  -9   9   1  -20.77   17.03
  -9   9   0    1.36    8.05
  -9   9  -1   10.26    8.76
  -9   9  -2   32.17   16.49
  -9  10   4   -4.84    7.25
  -9  10   3  -20.58   16.91
  -9  10   2  -32.73   20.56
  -9  10   1  -16.86   14.13
  -9  10   0   -8.49   11.48
  -9  11   3  -17.83   16.87
  -9  11   2  -31.21   21.01
 -10   0  11   -1.66   11.91
 -10   0  10   41.94   23.69
 -10   0   9  -18.95   20.33
 -10   0   8    8.95    8.79
 -10   0   6    0.78   16.09
 -10   0   5   -3.07   12.13
 -10   0   4   34.58   14.57
 -10   0   3  -34.81   22.54
 -10   0   2   -5.12   10.63
 -10   0   1    0.75    6.18
 -10   0   0   63.80   23.61
 -10   0  -1    5.92    8.45
 -10   0  -1   14.30   14.49
 -10   0  -2    1.51    1.84
 -10   0  -2   15.04   12.85
 -10   0  -3   -6.22    7.41
 -10   0  -3   10.19   13.03
 -10   0  -4    2.77    5.90
 -10   0  -4   14.91   12.63
 -10   0  -5    2.44    5.01
 -10   0  -5   24.74   14.59
 -10   0  -6    9.49   13.04
 -10   0  -6   13.59   12.27
 -10   0  -7    9.10    7.85
 -10   0  -7    7.05    7.87
 -10   0  -8   29.70   13.80
 -10  -1  11  -10.83   15.17
 -10   1  10   22.03   17.13
 -10  -1  10   23.69   16.59
 -10  -1   9  -11.52   19.45
 -10   1   9  -17.15   22.61
 -10  -1   8   -2.02   11.27
 -10   1   8  -20.95   22.54
 -10  -1   6   48.35   13.53
 -10   1   6  104.74   31.08
 -10  -1   5  -38.61   26.60
 -10   1   5   -0.03    1.77
 -10  -1   4  -20.84   21.66
 -10   1   4  -18.92   20.10
 -10  -1   3   30.97   19.25
 -10   1   3   -6.66   10.83
 -10  -1   2   11.43   11.71
 -10   1   2   53.42   21.88
 -10  -1   1   13.24    3.39
 -10   1   1   43.85   20.82
 -10  -1   0   -4.26    7.09
 -10   1   0   16.77   14.03
 -10  -1  -1   -4.20    6.50
 -10   1  -1    2.73    3.96
 -10  -1  -1   18.12   11.41
 -10   1  -1   11.72   14.67
 -10  -1  -2    7.49    4.38
 -10   1  -2   14.46   10.82
 -10  -1  -2   31.50   17.56
 -10   1  -2   10.35    5.96
 -10  -1  -3    3.02    2.78
 -10   1  -3    8.65    8.74
 -10  -1  -3    6.68    9.34
 -10   1  -3    6.60    9.53
 -10  -1  -4  -14.88   13.64
 -10   1  -4    8.05    8.05
 -10  -1  -4   10.01    9.50
 -10   1  -4    4.83    6.40
 -10  -1  -5  -11.79   11.84
 -10   1  -5   10.07    8.72
 -10  -1  -5   15.56   12.06
 -10   1  -5    6.40    6.22
 -10  -1  -6   29.99   13.41
 -10   1  -6   45.65   19.94
 -10  -1  -6   73.38   25.24
 -10   1  -6   35.86   17.79
 -10  -1  -7   -2.46    9.42
 -10   1  -7   11.00    9.43
 -10  -1  -7    1.50    6.02
 -10   1  -7  -17.47   13.23
 -10  -1  -8   23.98   15.60
 -10  -2  10   18.84   11.05
 -10  -2   9  -16.46   16.04
 -10   2   8  -34.37   24.97
 -10  -2   8   18.57   14.29
 -10   2   8    3.56   15.96
 -10   2   7  -21.94   19.54
 -10   2   6   14.56   12.28
 -10  -2   5  -19.53   24.42
 -10   2   5  -12.88   15.12
 -10  -2   4  -11.16   19.37
 -10   2   4   28.53   13.28
 -10  -2   3   -2.43   10.51
 -10   2   3    6.08   10.34
 -10  -2   2    0.53    3.39
 -10   2   2   17.14   16.29
 -10  -2   1  -20.53   17.47
 -10   2   1   20.84   14.66
 -10  -2   0   68.69   23.38
 -10   2   0   77.55   28.20
 -10   2  -1    4.86    8.82
 -10   2  -1    4.00    7.18
 -10   2  -2   -4.26    3.91
 -10  -2  -2   -5.53    9.53
 -10   2  -2    2.03    2.47
 -10   2  -3    1.58    8.00
 -10  -2  -3   -1.97    4.97
 -10   2  -3   -5.54    7.42
 -10   2  -4   -7.64    9.26
 -10   2  -4    8.20   10.60
 -10  -2  -4   11.46   10.89
 -10   2  -5    2.74    8.58
 -10   2  -5    8.15   10.97
 -10  -2  -5   13.92    9.15
 -10   2  -6    4.43    3.92
 -10   2  -6   -1.35    3.93
 -10  -2  -6    8.33   10.30
 -10   2  -7   15.17   14.78
 -10   2  -7   37.21   18.48
 -10  -2  -7   46.49   19.74
 -10  -2  -8   18.25   13.62
 -10  -3   9  -10.56   16.07
 -10  -3   8   10.27   13.18
 -10   3   8  -20.49   23.28
 -10   3   7   -7.09   13.13
 -10   3   6   58.26   20.32
 -10   3   5   -9.83   12.11
 -10  -3   4  -67.85   34.88
 -10   3   4   15.76   13.43
 -10  -3   3  -32.68   25.19
 -10   3   3    4.29    9.71
 -10  -3   2   66.54   17.57
 -10   3   2   99.79   29.95
 -10  -3   1  -14.47   16.00
 -10   3   1   17.86   13.69
 -10  -3   0   11.43   12.36
 -10   3   0    5.02    6.39
 -10  -3  -1  -27.88   21.17
 -10   3  -1   -1.11    6.45
 -10   3  -2  -10.83   11.58
 -10  -3  -2   -5.00    9.98
 -10   3  -3   -0.64    6.54
 -10   3  -3    7.42    6.99
 -10   3  -4    3.07    7.67
 -10   3  -4   21.11   13.24
 -10  -3  -4   -0.70    7.20
 -10   3  -5   -4.85    7.14
 -10   3  -5    6.61    9.04
 -10  -3  -5   -5.88   10.88
 -10   3  -6   -1.87    7.60
 -10   3  -6    0.25    5.15
 -10  -3  -6   10.05   12.95
 -10   3  -7   21.71   15.22
 -10  -3  -7    8.66    8.82
 -10  -3  -8   -6.88    5.18
 -10  -4   8   21.00   12.57
 -10   4   8   13.03    9.44
 -10  -4   7   -8.05   14.76
 -10   4   7   -7.97   15.27
 -10   4   6   -6.34   14.17
 -10   4   5   16.31   13.89
 -10   4   4   97.40   28.23
 -10   4   3   35.41   18.79
 -10  -4   2  -33.73   26.94
 -10   4   2   15.97   13.14
 -10  -4   1  -15.76   17.22
 -10   4   1   12.25   10.74
 -10  -4   0   32.85   15.46
 -10   4   0   40.61   17.96
 -10   4  -1    1.25    8.73
 -10  -4  -1    1.72    9.39
 -10   4  -2   -5.26    5.90
 -10  -4  -2   -2.53    2.96
 -10   4  -3   -0.81    9.44
 -10  -4  -3   -8.82   13.73
 -10   4  -4  -14.94   15.00
 -10  -4  -4   -3.51   13.46
 -10   4  -5  -18.09   18.66
 -10  -4  -5  -21.11   16.57
 -10  -4  -6  -14.28   14.83
 -10  -4  -7   -8.25   11.71
 -10   5   8   12.29   13.22
 -10  -5   7   -4.05   12.39
 -10   5   7  -19.44   17.57
 -10   5   6   70.58   25.11
 -10   5   5   21.61   15.54
 -10   5   4   29.05   19.21
 -10   5   3   21.82   17.73
 -10   5   2    8.89   12.88
 -10   5   1  -12.41   10.38
 -10   5   0    9.44    8.43
 -10  -5   0  -29.03   23.75
 -10   5  -1   -3.53   10.26
 -10  -5  -1   -9.87   12.79
 -10   5  -2    1.33    4.33
 -10  -5  -2   -6.90   12.04
 -10   5  -3  -25.15   20.18
 -10  -5  -3  -15.34   14.83
 -10   5  -4  -14.11   13.98
 -10  -5  -4  -12.42   13.35
 -10  -5  -5    7.67    5.83
 -10  -5  -6   11.50    7.44
 -10   6   7  -20.03   20.69
 -10   6   6   15.81   12.02
 -10   6   5   12.41   14.02
 -10   6   4   78.94   28.05
 -10   6   3   18.41   13.75
 -10   6   2  -10.90   10.13
 -10   6   1   18.85   10.09
 -10   6   0   12.80    9.56
 -10   6  -1  -15.94   15.30
 -10  -6  -2  -47.67   26.14
 -10   6  -2   -9.94   16.84
 -10  -6  -3  -26.77   21.58
 -10   6  -3  -24.67   21.38
 -10  -6  -4  -23.21   21.39
 -10  -6  -5  -33.53   20.86
 -10   7   6   14.51   11.73
 -10   7   5    0.70    6.45
 -10   7   4    8.61   14.62
 -10   7   3   -1.55    5.86
 -10   7   2  -12.18   10.41
 -10   7   1   -0.84    5.73
 -10   7   0  -16.51   15.77
 -10   7  -1  -28.60   19.85
 -10   8   5   17.30   15.90
 -10   8   4   32.02   18.75
 -10   8   3   -2.63    9.57
 -10   8   2   11.97   11.50
 -10   8   1   -9.02   11.91
 -10   9   4   11.14   11.16
 -10   9   3  -16.58   12.41
 -11   0   9    1.91   13.24
 -11   0   8    1.78   14.26
 -11   0   6  -50.34   31.99
 -11   0   5  -12.55   14.20
 -11   0   4   -3.15   13.40
 -11   0   3  -50.22   25.57
 -11   0   2   -4.88   12.09
 -11   0   1   -1.49    8.05
 -11   0   0   35.62   17.66
 -11   0  -1   10.04   10.07
 -11   0  -2    2.79    7.80
 -11   0  -3    9.83    9.69
 -11   0  -3   23.04   17.38
 -11   0  -4    9.15    8.59
 -11   0  -4    7.48   10.51
 -11   0  -5   -1.17    4.25
 -11   0  -6   11.78   12.17
 -11   1   9  -12.55   18.83
 -11  -1   8   -5.08    2.52
 -11   1   8   -3.58   13.00
 -11   1   7  -47.08   24.00
 -11  -1   6  -43.44   33.35
 -11   1   6   -6.64   14.12
 -11  -1   5  -29.82   25.82
 -11   1   5  -20.35   16.39
 -11  -1   4    4.35   13.29
 -11   1   4   12.32   10.21
 -11  -1   3   -7.39   12.65
 -11   1   3  -27.52   19.23
 -11  -1   2    4.40    4.80
 -11   1   2    8.55   10.71
 -11  -1   1   -9.45   13.63
 -11   1   1    7.06   11.49
 -11  -1   0   16.30   13.64
 -11   1   0   17.04   15.34
 -11  -1  -1    1.83    3.80
 -11   1  -1    3.46    7.98
 -11  -1  -2   -6.01    8.05
 -11   1  -2   13.94   14.29
 -11  -1  -3   -0.89    5.20
 -11   1  -3    3.02    7.10
 -11  -1  -3    2.65    9.48
 -11   1  -3    3.67    7.44
 -11  -1  -4    4.66    2.81
 -11   1  -4   22.31   12.26
 -11  -1  -4   38.53   18.19
 -11  -1  -5   -4.67    9.31
 -11   1  -5    7.40    9.35
 -11  -1  -6   -3.44    7.46
 -11   1  -6    4.56    7.31
 -11   2   8  -13.34   23.45
 -11   2   7  -31.30   21.48
 -11   2   6   -5.16   10.99
 -11  -2   5  -50.85   31.45
 -11   2   5  -20.02   18.41
 -11  -2   4  -25.43   25.78
 -11   2   4   22.81   13.71
 -11  -2   3  -12.73   16.56
 -11   2   3  -12.68   13.12
 -11  -2   2    3.42    9.36
 -11   2   2   27.67   18.99
 -11  -2   1    4.64    8.45
 -11   2   1    6.93    9.98
 -11  -2   0  -40.98   26.07
 -11   2   0   17.37   14.62
 -11  -2  -1    9.08    5.58
 -11   2  -1   16.81   15.97
 -11  -2  -2   24.03   14.46
 -11   2  -2   22.37   15.95
 -11  -2  -3   -2.72    9.33
 -11   2  -3   15.90   14.53
 -11  -2  -3  -16.65   13.26
 -11  -2  -4  -10.85   12.64
 -11   2  -4   12.87   11.95
 -11  -2  -4   -0.69    2.74
 -11  -2  -5  -19.18   15.26
 -11   2  -5   18.47   13.62
 -11  -2  -6  -13.77   14.27
 -11   2  -6   14.78   14.24
 -11   3   8  -28.56   21.67
 -11   3   7    1.44   14.74
 -11   3   6    6.90    3.10
 -11   3   5  -10.18   13.86
 -11  -3   4  -26.90   22.40
 -11   3   4    0.38    7.58
 -11  -3   3  -63.10   33.18
 -11   3   3    0.95    8.63
 -11  -3   2    7.30   13.87
 -11   3   2   46.44   22.62
 -11  -3   1   -5.16   11.79
 -11   3   1   14.22   10.78
 -11  -3   0   -7.67    8.74
 -11   3   0   19.56   15.44
 -11  -3  -1    4.21    5.20
 -11   3  -1   12.29   13.74
 -11  -3  -2  -29.70   21.17
 -11   3  -2    1.35    3.95
 -11  -3  -3  -12.82   13.63
 -11  -3  -4  -11.47   15.27
 -11   3  -5    3.60    9.87
 -11   3  -6   12.67   12.96
 -11   4   8    1.05   10.51
 -11   4   7   -9.89   14.65
 -11   4   6  -15.82   17.86
 -11   4   5  -18.05   15.78
 -11   4   4   34.51   17.92
 -11   4   3   21.83   16.67
 -11  -4   2  -30.68   24.94
 -11   4   2   23.41   16.18
 -11  -4   1  -18.71   19.45
 -11   4   1    5.44   11.53
 -11  -4   0  -14.70   15.32
 -11   4   0   11.30   10.55
 -11  -4  -1   -8.32   17.77
 -11  -4  -2   10.23    8.40
 -11  -4  -3  -21.38   14.40
 -11   5   7  -23.86   21.48
 -11   5   6   16.92   14.91
 -11   5   5    4.89    7.81
 -11   5   4   19.27   15.76
 -11   5   3   25.56   16.40
 -11   5   2   24.06   17.21
 -11   5   1    1.03    4.45
 -11  -5  -1  -44.02   27.38
 -11   6   7  -31.69   20.75
 -11   6   6   26.63   15.90
 -11   6   5   10.08   10.77
 -11   6   4   17.63   13.99
   0   0   0    0.00    0.00


TITL exp_1410 in P2(1)/c
REM P2(1)/c (#14 in standard setting)
CELL 0.71073   9.216234  11.903121  12.665456  90.0000  95.0018  90.0000
ZERR    6.00   0.001779   0.001837   0.001985   0.0000   0.0153   0.0000
LATT  1
SYMM -x, y+1/2,-z+1/2
SFAC C H N O
UNIT 66.00 60.00 6.00 6.00
TREF
HKLF 4
END
_computing_structure_solution     'SHELXT 2014/5 (Sheldrick, 2014)'
_computing_structure_solution     'SHELXT 2014/5 (Sheldrick, 2014)'
_computing_structure_solution     'SHELXT 2014/5 (Sheldrick, 2014)'
_computing_structure_solution     'SHELXT 2014/5 (Sheldrick, 2014)'
_computing_structure_solution     'SHELXT 2014/5 (Sheldrick, 2014)'
;
_shelx_hkl_checksum               90786
_olex2_submission_special_instructions 'No special instructions were received'
_oxdiff_exptl_absorpt_empirical_details
;
Empirical correction (ABSPACK) includes:
- Absorption correction using spherical harmonics
- Frame scaling
;
_oxdiff_exptl_absorpt_empirical_full_max 2.261
_oxdiff_exptl_absorpt_empirical_full_min 0.606
